# Supplementary material for: Nutritional component changes in Xiangfen 1 banana at different developmental stages
Source: Royal Society of Chemistry journal article supplement (doi:10.1039/d0fo00999g), 2020-01-01
Supplement: d0fo00999g1.xlsx [file d0fo00999g1.xlsx]

## Sheet: Sheet1
Table 2 Differential metabolites between mature green fruit and mature fruit
Index	Compounds	Class	maturegreenfruit1	maturegreenfruit2	maturegreenfruit3	maturefruit1	maturefruit2	maturefruit3	VIP	Fold_Change	Log2FC	Type
pma0294	Chrysoeriol 5-O-hexoside	Flavone	9	9	9	245000	174000	188000	1.36819	22481.5	14.4564	up
pma0461	14,15-Dehydrocrepenynic acid	Lipids	62100000	61800000	38900000	7390000	7180000	4770000	1.34305	0.118796	-3.07344	down
pma2088	Quercetin-3,4'-O-di-beta-glucopyranoside	Flavonol	9	9	9	149000	98400	192000	1.36731	16274.1	13.9903	up
pma3606	9-Hydroxy-(10E,12Z,15Z)-octadecatrienoic acid	Lipids	41500000	51300000	21600000	4740000	4400000	3270000	1.32519	0.108479	-3.20451	down
pma6270	sn-Glycero-3-phosphocholine	Alkaloids	4580000	5240000	1710000	1110000	854000	1020000	1.18737	0.258803	-1.95007	down
pma6281	Methylglutaric acid	Organic acids and derivatives	82000	63600	88600	12600	24800	24000	1.29048	0.262169	-1.93143	down
pma6639	Isorhamnetin O-hexoside	Flavonol	72500	93300	130000	347000	373000	227000	1.27525	3.20149	1.67874	up
pmb0069	Benzamide	Others	1470000	1400000	1500000	420000	432000	457000	1.36634	0.299542	-1.73917	down
pmb0130	N-Acetyl tryptamine	Phenolamides	9	9	9	80200	63100	86800	1.36812	8522.22	13.057	up
pmb0197	N2-methylguanosine	Nucleotide and derivates	706000	485000	575000	5550000	4170000	3540000	1.35003	7.50849	2.90852	up
pmb0247	p-Aminobenzoate	Organic acids and derivatives	194000	68400	131000	3610000	4770000	6750000	1.34471	38.4596	5.26527	up
pmb0382	O-Feruloyl 4-hydroxylcoumarin	Phenylpropanoids	1970000	1290000	1940000	3970000	4290000	4900000	1.30426	2.53077	1.33958	up
pmb0423	Hydroxy-methoxycinnamate	Phenylpropanoids	8970000	7800000	8940000	2680000	2160000	5230000	1.20658	0.391676	-1.35227	down
pmb0449	2-Aminoadipic acid (L-Homoglutamic acid)	Amino acid and derivatives	359000	205000	217000	189000	118000	78500	1.04475	0.493598	-1.01859	down
pmb0464	Aspartic acid di-O-glucoside	Amino acid and derivatives	912000	1160000	937000	2800000	3700000	2850000	1.33858	3.10734	1.63568	up
pmb0484	Choline	Alkaloids	181000000	180000000	147000000	72800000	43600000	56700000	1.31145	0.340748	-1.55322	down
pmb0490	N-p-Coumaroyl putrescine	Phenolamides	521000	406000	417000	1620000	1780000	863000	1.257	3.17188	1.66534	up
pmb0505	N'-p-Coumaroyl putrescine	Phenolamides	623000	566000	793000	2440000	2210000	1150000	1.22782	2.92634	1.5491	up
pmb0588	Luteolin 3',7-di-O-glucoside	Flavone	43700	68000	90000	22600	9	9	1.04812	0.112137	-3.15667	down
pmb0607	Chrysoeriol 7-O-hexoside	Flavone	9	9	9	286000	201000	127000	1.36704	22740.7	14.473	up
pmb0620	Chrysoeriol 6-C-hexoside 8-C-hexoside-O-hexoside	Flavone	227000	137000	307000	41600	9	9	1.07777	0.0620238	-4.01103	down
pmb0785	Isoquinoline	Alkaloids	104000	102000	97500	9	9	9	1.36843	8.89621e-05	-13.4564	down
pmb0800	Niacinamide	Vitamins and derivatives	9880000	7320000	8760000	2220000	2250000	2590000	1.35187	0.271957	-1.87855	down
pmb0819	3-Indoleacetonitrile	Indole derivatives	118000	373000	81500	547000	478000	696000	1.10641	3.00611	1.5879	up
pmb0824	Syringic acid O-feruloyl-O-hexoside	Organic acids and derivatives	9	9	9	77900	30200	56600	1.36572	6100	12.5746	up
pmb0829	Phosphoric acid	Organic acids and derivatives	2880000	2110000	3250000	1720000	1340000	980000	1.18341	0.490291	-1.02829	down
pmb0848	LysoPC 16:1 (2n isomer)	Lipids	7440000	7210000	5480000	882000	612000	798000	1.35655	0.11386	-3.13467	down
pmb0854	LysoPC 18:3	Lipids	18100000	11600000	3920000	2500000	1490000	1420000	1.18439	0.160916	-2.63562	down
pmb0855	LysoPC 16:0	Lipids	76500000	57800000	19800000	11300000	5470000	6150000	1.21654	0.148735	-2.74919	down
pmb0863	LysoPC 16:2 (2n isomer)	Lipids	4860000	3910000	2380000	889000	657000	772000	1.31238	0.207892	-2.26609	down
pmb0882	LysoPC 18:1	Lipids	4460000	5410000	6870000	2800000	1690000	2660000	1.23567	0.427121	-1.22728	down
pmb0889	Punicic acid	Lipids	18200000	19300000	10200000	1270000	1440000	1340000	1.35009	0.0849057	-3.558	down
pmb0964	iP7G	Nucleotide and derivates	374000	228000	367000	9	9	9	1.36756	2.78638e-05	-15.1312	down
pmb0998	Guanosine 5'-monophosphate	Nucleotide and derivates	829000	433000	310000	187000	126000	143000	1.20712	0.290076	-1.7855	down
pmb1178	O-Feruloyl 2-hydroxylcoumarin	Phenylpropanoids	233000	271000	160000	1440000	1160000	1570000	1.34201	6.28012	2.65079	up
pmb1240	Phellodensin F	Others	9	9	9	1490000	1510000	1220000	1.36836	156296	17.2539	up
pmb1530	Phytocassane D	Terpene	18900	24300	16200	9	9	9	1.36801	0.000454545	-11.1033	down
pmb1574	Octadecadien-6-ynoic acid	Lipids	1200000	1880000	364000	160000	197000	150000	1.18814	0.147213	-2.76403	down
pmb2222	Phytocassane C	Terpene	5170000	3890000	2210000	12600000	15300000	14000000	1.28019	3.71783	1.89446	up
pmb2228	LysoPC 19:0	Lipids	311000	283000	193000	54900	50500	31300	1.325	0.173698	-2.52535	down
pmb2260	LysoPC 15:1	Lipids	2810000	2260000	1290000	208000	161000	148000	1.34101	0.0812893	-3.62079	down
pmb2319	LysoPC 15:0	Lipids	32000000	22900000	7850000	1700000	1150000	1110000	1.29709	0.0631076	-3.98604	down
pmb2388	LysoPC 18:0 (2n isomer)	Lipids	1690000	1750000	1340000	890000	358000	546000	1.2089	0.375314	-1.41383	down
pmb2406	LysoPC 17:0	Lipids	54600000	40200000	19600000	15500000	18100000	8470000	1.0746	0.367745	-1.44322	down
pmb2556	Syringaldehyde O-glucoside	Organic acids and derivatives	9	20200	9	190000	280000	270000	1.13042	36.601	5.19381	up
pmb2620	3,4-Dimethoxycinnamic acid	Phenylpropanoids	58600	62900	24000	9	9	9	1.36524	0.000185567	-12.3958	down
pmb2653	D(+)-Melezitose O-rhamnoside	Carbohydrates	17200	16000	11400	46800	50000	49100	1.33709	3.2713	1.70986	up
pmb2778	9,10-EODE	Lipids	526000	695000	431000	52100	39800	22400	1.3394	0.0691889	-3.85332	down
pmb2786	9-HOTrE	Lipids	60400	51100	35300	6530	8970	6430	1.3417	0.149387	-2.74287	down
pmb2787	9-KODE	Lipids	1430000	1560000	955000	414000	531000	320000	1.28485	0.320659	-1.64089	down
pmb2789	13-HpOTrE(r)	Lipids	280000	288000	147000	16100	7380	10000	1.34079	0.0468252	-4.41657	down
pmb2791	9-HpOTrE	Lipids	195000	315000	185000	66700	98900	58800	1.26832	0.322878	-1.63094	down
pmb2804	13-HPODE	Lipids	501000	599000	197000	54200	40300	46400	1.29945	0.108635	-3.20243	down
pmb2835	Syringaldehyde	Phenylpropanoids	9590	14500	16500	150000	124000	131000	1.35367	9.97783	3.31873	up
pmb2848	3(2'-Chlorophenyl)-7-hydroxy-4-phenylcoumarin	Phenylpropanoids	267000	244000	214000	9	9	9	1.36836	3.72414e-05	-14.7127	down
pmb2871	2,5-dihydroxy benzoic acid O-hexside	Organic acids and derivatives	160000	184000	138000	539000	652000	492000	1.34398	3.4917	1.80393	up
pmb2922	Uridine 5'-diphospho-D-glucose	Nucleotide and derivates	15000000	11700000	12400000	6280000	6220000	6000000	1.33979	0.473146	-1.07964	down
pmb2938	4-O-Caffeoyl quinic acid (criptochlorogenic acid)	Organic acids and derivatives	70800	46200	50300	191000	160000	129000	1.30199	2.8691	1.5206	up
pmb3041	Tricin O-saccharic acid	Flavone	9	9	9	489000	680000	544000	1.36818	63444.4	15.9532	up
pmb3056	Homovanilloyl quinic acid	Organic acids and derivatives	9	9	9	21600	11300	13600	1.36672	1722.22	10.7501	up
pmb3088	Trehalose 6-phosphate	Carbohydrates	211000	177000	167000	944000	980000	933000	1.36317	5.14775	2.36394	up
pmb3107	Syringic acid O-glucoside	Organic acids and derivatives	335000	271000	319000	3920000	5170000	5690000	1.36256	15.9784	3.99805	up
pmb3117	LysoPE 16:0	Lipids	16100000	9100000	4710000	2110000	1540000	1160000	1.24618	0.160816	-2.63652	down
pmb3121	LysoPE 18:1	Lipids	6600000	6310000	4210000	2600000	1450000	1960000	1.26283	0.351051	-1.51025	down
pmb3132	LysoPE 18:1 (2n isomer)	Lipids	7840000	7300000	5680000	2730000	1690000	2080000	1.31473	0.3122	-1.67946	down
pmb3894	Di-O-methylquercetin	Flavonol	11200000	12500000	4600000	960000	617000	806000	1.31758	0.0842049	-3.56995	down
pmc0274	6-Methylmercaptopurine	Nucleotide and derivates	87000000	80200000	92500000	21900000	28900000	29900000	1.34637	0.310743	-1.68621	down
pmc0960	LysoPC 20:4	Lipids	9190000	13800000	8760000	5030000	2140000	3640000	1.21675	0.340472	-1.55439	down
pmd0132	LysoPC 16:0 (2n isomer)	Lipids	89400000	51600000	19100000	12500000	5990000	5260000	1.18286	0.148345	-2.75297	down
pmd0160	LysoPE 16:0 (2n isomer)	Lipids	16800000	9510000	4860000	2250000	1650000	1460000	1.24378	0.17196	-2.53985	down
pme0006	L-Proline	Amino acid and derivatives	91900000	79400000	92800000	39900000	35200000	31900000	1.34527	0.40515	-1.30347	down
pme0011	L-Aspartic acid	Amino acid and derivatives	18400000	14900000	16800000	2160000	2980000	2330000	1.35848	0.149102	-2.74563	down
pme0013	L-Glutamic acid	Amino acid and derivatives	7620000	6270000	7880000	1390000	1770000	1750000	1.35437	0.22554	-2.14855	down
pme0016	L-(-)-Cystine	Amino acid and derivatives	194000	172000	118000	26500	69000	39600	1.23855	0.279132	-1.84098	down
pme0021	L-Phenylalanine	Amino acid and derivatives	83300000	78100000	85700000	19700000	23000000	21300000	1.36418	0.259004	-1.94895	down
pme0026	L-(+)-Lysine	Amino acid and derivatives	11700000	8380000	9500000	34300000	28400000	21100000	1.29977	2.833	1.50233	up
pme0033	Hypoxanthine	Nucleotide and derivates	10700000	12300000	21000000	4950000	6440000	9900000	1.06934	0.483864	-1.04733	down
pme0040	Adenine	Nucleotide and derivates	21700000	19200000	24600000	6250000	4620000	4100000	1.34212	0.22855	-2.12942	down
pme0164	N-γ-Acetyl-N-2-Formyl-5-methoxykynurenamine	Amino acid and derivatives	105000	120000	93300	50000	42600	59000	1.30524	0.47628	-1.07012	down
pme0183	2-Hydroxy-6-aminopurine	Nucleotide and derivates	16700000	11200000	12300000	4880000	3560000	2740000	1.30264	0.278109	-1.84628	down
pme0191	N-Glycyl-L-leucine	Amino acid and derivatives	1110000	1230000	1060000	21600000	20000000	17800000	1.36661	17.4706	4.12686	up
pme0205	Catechin	Polyphenol	95600	9	9	357000	317000	357000	1.05442	10.7825	3.43062	up
pme0207	3-Hydroxybutyrate	Organic acids and derivatives	9	9	9	364000	246000	196000	1.36769	29851.9	14.8655	up
pme0230	Adenosine	Nucleotide and derivates	7140000	4580000	4300000	15300000	11300000	12100000	1.2672	2.41573	1.27246	up
pme0249	Azelaic acid	Organic acids and derivatives	299000	259000	171000	79000	57000	50900	1.30557	0.256379	-1.96365	down
pme0275	4-Oxopentanoate	Organic acids and derivatives	9	9	9	37800	24000	15000	1.3655	2844.44	11.4739	up
pme0286	2-Hydroxyisocaproic acid	Organic acids and derivatives	40200	63800	54200	14700000	13500000	16000000	1.36647	279.393	8.12615	up
pme0300	trans-Cinnamate	Phenylpropanoids	9	9	9	1080000	912000	590000	1.36783	95629.6	16.5452	up
pme0303	Caffeate	Phenylpropanoids	5090000	5260000	3880000	1160000	1270000	1940000	1.30869	0.307098	-1.70323	down
pme0305	Ferulic acid	Phenylpropanoids	12100000	11100000	9410000	1580000	1230000	1810000	1.35592	0.141674	-2.81935	down
pme0377	Naringenin	Flavanone	259000	266000	427000	82500	59300	71200	1.32462	0.223739	-2.16011	down
pme0408	Syringic acid	Phenylpropanoids	9	9	9	64000	54700	44200	1.36808	6033.33	12.5587	up
pme0414	Vanillin	Organic acids and derivatives	474000	683000	502000	1190000	1140000	1030000	1.29472	2.02532	1.01815	up
pme0422	3-Hydroxy-4-methoxycinnamic acid	Phenylpropanoids	12900000	10800000	9690000	1560000	1240000	1890000	1.35351	0.140461	-2.83176	down
pme0474	4-Hydroxybenzoic acid	Organic acids and derivatives	463000	301000	432000	4490000	4110000	3900000	1.35978	10.4515	3.38564	up
pme0500	D(+)-Melezitose	Carbohydrates	127000	75100	133000	8350000	5810000	6000000	1.36168	60.1611	5.91076	up
pme0519	D-(+)-Sucrose	Carbohydrates	1220000	1330000	1410000	3690000	4530000	2970000	1.32743	2.82576	1.49864	up
pme1018	Glutathione oxidized	Amino acid and derivatives	1170000	737000	1160000	74500	78000	114000	1.34915	0.0868927	-3.52462	down
pme1086	Glutathione reduced form	Amino acid and derivatives	940000	1390000	3280000	276000	385000	1010000	1.03048	0.297861	-1.74729	down
pme1194	Deoxycytidine	Nucleotide and derivates	2380000	1560000	1900000	806000	509000	426000	1.2832	0.298116	-1.74605	down
pme1242	S-(methyl)glutathione	Amino acid and derivatives	1140000	710000	701000	301000	398000	388000	1.2531	0.426107	-1.23071	down
pme1283	S-(5'-Adenosy)-L-homocysteine	Amino acid and derivatives	60700	53400	55700	132000	151000	125000	1.35264	2.40283	1.26473	up
pme1408	L-Glutamine	Amino acid and derivatives	8120000	7010000	7800000	1200000	2070000	1470000	1.34028	0.206716	-2.27428	down
pme1434	Syringin	Phenylpropanoids	9	9	9	120000	151000	123000	1.36825	14592.6	13.8329	up
pme1478	Myricetin	Flavonol	11500	14800	16100	9	9	7840	1.02503	0.18533	-2.43183	down
pme1588	Isorhamnetin	Flavonol	9900	13400	5910	9	9	9	1.36567	0.000924341	-10.0793	down
pme1637	Coniferyl alcohol	Phenylpropanoids	9	9	9	114000	39000	17400	1.35761	6311.11	12.6237	up
pme1643	(+)-piperitol	Terpene	9	9	9	6170	8550	10100	1.36706	919.259	9.84433	up
pme1692	Inosine 5'-monophosphate	Nucleotide and derivates	53200	33300	35400	94000	103000	94700	1.29797	2.39295	1.25879	up
pme1695	Sinapic acid	Phenylpropanoids	790000	922000	766000	3100000	3430000	3660000	1.36002	4.11219	2.03991	up
pme1712	L-Saccharopine	Amino acid and derivatives	234000	306000	163000	65700	51000	83400	1.28476	0.284637	-1.8128	down
pme1730	D-Erythronolactone	Organic acids and derivatives	162000	171000	215000	571000	641000	727000	1.34809	3.53832	1.82307	up
pme1944	D-Mannitol	Alcohols	1160000	616000	934000	194000	296000	426000	1.2072	0.338007	-1.56487	down
pme1987	L-Alanine	Amino acid and derivatives	10000	14000	11500	9	8110	9	1.00501	0.228958	-2.12685	down
pme2046	3-N-Methyl-L-histidine	Amino acid and derivatives	477000	306000	414000	255000	161000	180000	1.19914	0.497911	-1.00604	down
pme2129	(S)-(-)-2-Hydroxyisocaproic acid	Organic acids and derivatives	336000	364000	406000	107000000	99900000	114000000	1.3681	290.145	8.18063	up
pme2155	Theobromine	Alkaloids	9	9	9	285000	281000	372000	1.36818	34740.7	15.0843	up
pme2241	Citraconic acid	Organic acids and derivatives	5860000	6350000	5610000	16600000	18600000	19400000	1.36014	3.06397	1.6154	up
pme2253	L-Gulonic-γ-lactone	Others	239000	206000	302000	694000	569000	399000	1.22703	2.2249	1.15374	up
pme2277	3-Aminosalicylic acid	Organic acids and derivatives	245000	111000	155000	403000	384000	313000	1.1783	2.15264	1.10611	up
pme2292	Putrescine	Phenolamides	1000000	783000	814000	4930000	3270000	2650000	1.31815	4.1779	2.06278	up
pme2366	Phenethylamine	Others	1290000	1260000	1420000	362000	365000	396000	1.36446	0.282872	-1.82178	down
pme2527	L(+)-Ornithine	Amino acid and derivatives	49500	47400	33300	196000	146000	124000	1.31437	3.57911	1.8396	up
pme2550	Cis-Aconitic acid	Organic acids and derivatives	37800	28800	60800	17400	16200	11700	1.22045	0.355573	-1.49178	down
pme2661	Vitamin D3	Vitamins and derivatives	95300	106000	40400	9	9	9	1.36571	0.000111709	-13.128	down
pme2670	4-Hydroxybenzaldehyde	Organic acids and derivatives	471000	607000	605000	1840000	2260000	2130000	1.35117	3.70172	1.8882	up
pme2698	Phe-Phe	Amino acid and derivatives	31000	35500	11100	140000	187000	111000	1.25257	5.64433	2.4968	up
pme2743	N-Phenylacetylglycine	Amino acid and derivatives	9	9	9	1260000	891000	1110000	1.36826	120778	16.882	up
pme2773	L-Cystathionine	Amino acid and derivatives	27200	21000	19800	10300	10700	11400	1.31857	0.476471	-1.06954	down
pme2830	O-Phosphorylethanolamine	Others	239000	254000	144000	968000	911000	841000	1.32652	4.27002	2.09424	up
pme2890	L-Homocystine	Amino acid and derivatives	46800	53700	58900	575000	627000	401000	1.35682	10.0565	3.33005	up
pme2914	3-Hydroxy-3-methylpentane-1,5-dioic acid	Amino acid and derivatives	1300000	1340000	1220000	386000	538000	419000	1.3439	0.347927	-1.52314	down
pme2960	Naringenin chalcone	Flavanone	287000	263000	411000	91100	77200	86000	1.33476	0.26462	-1.918	down
pme2988	3,4-Dihydrocoumarin	Phenylpropanoids	112000	165000	136000	47800	9	9	1.04285	0.115782	-3.11052	down
pme2993	Scopoletin (7-Hydroxy-5-methoxycoumarin)	Phenylpropanoids	102000	62600	65200	866000	893000	621000	1.35039	10.3568	3.37251	up
pme3009	trans-Citridic acid	Organic acids and derivatives	1260000	1180000	1200000	363000	555000	460000	1.32731	0.378571	-1.40136	down
pme3013	3-Aminoisobutanoic acid	Amino acid and derivatives	2280	4630	4270	9	2610	9	1.00257	0.235063	-2.08888	down
pme3017	2-Aminoisobutyric acid	Amino acid and derivatives	34200000	33300000	23500000	12600000	8420000	8210000	1.3028	0.321209	-1.63842	down
pme3033	N,N-Dimethylglycine	Amino acid and derivatives	3980000	3760000	3050000	2010000	1690000	1450000	1.29783	0.477294	-1.06705	down
pme3081	4-(Aminomethyl)-5-(hydroxymethyl)-2-methylpyridin-3-ol	Alcohols	14200000	12300000	15300000	6530000	7110000	5240000	1.31684	0.451675	-1.14664	down
pme3123	Sinapyl alcohol	Phenylpropanoids	9	9	13000	168000	273000	246000	1.16017	52.7731	5.72173	up
pme3179	CYS-GLY	Amino acid and derivatives	110000	154000	320000	13300	22500	53600	1.20901	0.153082	-2.70762	down
pme3184	2'-Deoxyadenosine-5'-monophosphate	Nucleotide and derivates	1330000	1020000	1110000	499000	540000	679000	1.29367	0.496532	-1.01004	down
pme3188	Uridine 5'-monophosphate	Nucleotide and derivates	1050000	1200000	1150000	2370000	2320000	2180000	1.35636	2.02059	1.01478	up
pme3207	trans,trans-Muconic acid	Organic acids and derivatives	301000	300000	230000	96600	89400	86000	1.34935	0.327316	-1.61124	down
pme3208	Glycitin	Isoflavone	9	9	9920	147000	53100	36400	1.11258	23.7975	4.57274	up
pme3267	Kaempferol 3-O-galactoside (Trifolin)	Flavonol	91200	57500	75200	42300	34900	25100	1.21434	0.4569	-1.13005	down
pme3367	6-MethylCoumarin	Phenylpropanoids	9	9	9	1010000	833000	984000	1.36837	104704	16.676	up
pme3369	Rhamnetin (7-O-methxyl quercetin)	Flavonol	22600	24500	7860	9	9	9	1.36253	0.000491266	-10.9912	down
pme3434	Eudesmic acid (3,4,5-trimethoxybenzoic acid)	Organic acids and derivatives	9	9	9	119000	156000	159000	1.36811	16074.1	13.9724	up
pme3443	Sinapinaldehyde	Phenylpropanoids	84100	73100	88100	1870000	1790000	1730000	1.36769	21.9731	4.45767	up
pme3453	p-Coumaraldehyde	Phenylpropanoids	9	9	9	45500	14900	17900	1.3634	2900	11.5018	up
pme3475	Butin	Flavone	253000	262000	438000	69200	67500	70600	1.32989	0.217524	-2.20076	down
pme3705	D-glucoronic acid	Others	741000	535000	639000	2040000	1670000	1700000	1.33819	2.82507	1.49828	up
pme3732	Cytidine	Nucleotide and derivates	92000	52200	106000	821000	797000	732000	1.3453	9.39249	3.23151	up
pme3970	β-Pseudouridine	Nucleotide and derivates	107000	119000	102000	374000	270000	304000	1.34163	2.89024	1.53119	up
pmf0032	Galactinol	Carbohydrates	7360000	5320000	5840000	16500000	14500000	14700000	1.33448	2.4676	1.30311	up
pmf0057	4,2',4',6'-Tetrahydroxychalcone	Flavone	56800	55200	92100	16500	10700	11500	1.32334	0.189613	-2.39887	down
pmf0058	4',5,7-Trihydroxyflavanone	Flavanone	61500	59700	96800	19500	12600	17000	1.31837	0.225229	-2.15053	down
pmf0068	Mannitol	Alcohols	305000	305000	252000	77700	54800	73800	1.34814	0.239327	-2.06294	down
pmf0104	Caffeic acid	Phenylpropanoids	205000	92000	171000	37400	61500	90000	1.08412	0.403632	-1.30889	down
pmf0123	Methyl ferulate	Phenylpropanoids	9	9	9	12000000	8520000	10900000	1.36831	1.1637e+06	20.1503	up
pmf0139	D-(+)-Galactose	Carbohydrates	5440000	5800000	4840000	12800000	11300000	13700000	1.34566	2.35075	1.23312	up
pmf0178	Ethyl caffeate	Organic acids and derivatives	661000	527000	209000	9	9	9	1.36581	1.93271e-05	-15.659	down
pmf0218	Phosphoenolpyruvate trisodium salt	Organic acids and derivatives	205000	113000	185000	60800	76100	90700	1.1916	0.452485	-1.14406	down
pmf0253	6-Benzylaminopurine	Nucleotide and derivates	30200	41700	40300	150000	111000	99900	1.32025	3.21658	1.68553	up
pmf0282	Melibiose	Carbohydrates	840000	485000	629000	1940000	1580000	1610000	1.29409	2.62538	1.39253	up
pmf0284	4-Hydroxy-3-methoxycinnamaldehyde	Phenylpropanoids	9	9	9	244000	95300	92200	1.3656	15981.5	13.9641	up
pmf0286	Phytol	Terpene	44800000	45300000	21500000	3060000	3500000	3220000	1.34052	0.0876344	-3.51236	down
pmf0292	D-erythro-sphinganine	Amino acid and derivatives	217000	171000	142000	441000	827000	910000	1.28042	4.10943	2.03894	up
pmf0319	Acetosyringone	Phenylpropanoids	9	9	9	201000	181000	240000	1.36823	23037	14.4917	up
pmf0324	Nornicotine	Alkaloids	203000	186000	273000	79800	83300	104000	1.30372	0.403474	-1.30945	down
pmf0325	Glucocheirolin	Terpene	7240	10600	19800	9	9	7150	1.01245	0.190436	-2.39262	down
pmf0348	2,6-Dimethyl-7-octene-2,3,6-triol	Alcohols	897000	957000	555000	231000	187000	235000	1.31531	0.271067	-1.88328	down
pmf0398	Arachidic acid	Lipids	152000	165000	106000	75300	44100	56400	1.24159	0.415603	-1.26672	down
pmf0418	Curdione	Others	1040000	861000	1110000	490000	380000	331000	1.30975	0.398871	-1.32601	down
pmf0434	Loganin	Terpene	18400	14300	14100	70400	64100	72700	1.35775	4.42735	2.14644	up
pmf0446	Gentiopicroside	Terpene	38600	59800	50700	9	9	9	1.36794	0.000181087	-12.431	down
pmf0458	6-Gingerol	Polyphenol	1710000	1790000	753000	9	9	84000	1.12699	0.019755	-5.66164	down
pmf0467	Morroniside	Terpene	187000	212000	221000	52700	57000	79800	1.33461	0.305645	-1.71007	down
pmf0485	Panose	Carbohydrates	116000	103000	99600	5210000	7060000	9150000	1.36374	67.2316	6.07107	up
pmf0504	Nandrolone	Others	193000	258000	63500	9	9	9	1.36372	5.24781e-05	-14.2179	down
pmf0557	Acid orange 20	Alkaloids	3120000	3020000	1630000	546000	376000	338000	1.31682	0.162162	-2.62449	down
pmf0559	Abrine	Alkaloids	108000	96300	135000	1500000	1330000	1210000	1.36309	11.9069	3.57372	up
pmf0585	Proline	Amino acid and derivatives	99000000	81100000	84000000	37700000	35600000	24400000	1.31096	0.369936	-1.43465	down
pmf0587	Aspartic acid	Amino acid and derivatives	18100000	16100000	16500000	2070000	2920000	2410000	1.36044	0.145957	-2.77639	down
pmf0589	Glutamic acid	Amino acid and derivatives	8340000	6650000	8850000	1420000	2010000	1960000	1.34396	0.226091	-2.14503	down
pmf0591	Cinnamic acid	Phenylpropanoids	9	9	9	705000	720000	532000	1.36825	72481.5	16.1453	up
pmf0594	D-(+)-Phenylalanine	Amino acid and derivatives	4010000	3590000	4220000	919000	1090000	974000	1.3612	0.252369	-1.98639	down
pmf0611	Chalcone	Flavonoid	9	9	9	150000	118000	55900	1.36581	11996.3	13.5503	up
