# Supplementary material for: Nutritional component changes in Xiangfen 1 banana at different developmental stages
Source: Royal Society of Chemistry journal article supplement (doi:10.1039/d0fo00999g), 2020-01-01
Supplement: d0fo00999g2.xlsx [file d0fo00999g2.xlsx]

## Sheet: Sheet1
Table 3 Differential metabolites between young fruit and mature fruit
Index	Compounds	Class	youngfruit1	youngfruit2	youngfruit3	maturefruit1	maturefruit2	maturefruit3	VIP	Fold_Change	Log2FC	Type
pma0134	D(-)-Threose	Carbohydrates	18100000	19000000	16700000	4350000	3380000	3270000	1.21875	0.204461	-2.2901	down
pma0294	Chrysoeriol 5-O-hexoside	Flavone	9	9	9	245000	174000	188000	1.22743	22481.5	14.4564	up
pma0461	14,15-Dehydrocrepenynic acid	Lipids	13500000	23200000	49300000	7390000	7180000	4770000	1.06069	0.224884	-2.15275	down
pma0948	Hydroxyphenethylamine	Others	34800000	30500000	30000000	6500000	6080000	5660000	1.22457	0.191396	-2.38537	down
pma2088	Quercetin-3,4'-O-di-beta-glucopyranoside	Flavonol	9	9	9	149000	98400	192000	1.2268	16274.1	13.9903	up
pma3101	Nicotinate ribonucleoside	Vitamins and derivatives	487000	572000	625000	2010000	1360000	1540000	1.18862	2.91568	1.54383	up
pma3606	9-Hydroxy-(10E,12Z,15Z)-octadecatrienoic acid	Lipids	10200000	20400000	48300000	4740000	4400000	3270000	1.07344	0.157288	-2.66852	down
pma6270	sn-Glycero-3-phosphocholine	Alkaloids	2230000	3260000	6500000	1110000	854000	1020000	1.10014	0.248874	-2.00651	down
pma6281	Methylglutaric acid	Organic acids and derivatives	157000	162000	151000	12600	24800	24000	1.20013	0.130638	-2.93635	down
pma6460	5-O-p-Coumaroylquinic acid	Organic acids and derivatives	14300	18100	17200	9	9	9	1.22747	0.000544355	-10.8432	down
pma6499	Limocitrin O-hexoside	Flavone	4980000	5100000	4870000	569000	726000	187000	1.16331	0.0991304	-3.33453	down
pma6576	Spinacetin	Flavone	1550000	995000	1140000	445000	534000	545000	1.16426	0.413569	-1.2738	down
pma6639	Isorhamnetin O-hexoside	Flavonol	176000	141000	87900	347000	373000	227000	1.05634	2.33885	1.2258	up
pmb0130	N-Acetyl tryptamine	Phenolamides	9	9	9	80200	63100	86800	1.22749	8522.22	13.057	up
pmb0164	MAG (18:2) isomer1	Lipids	2150000	1780000	2360000	714000	699000	539000	1.20286	0.310334	-1.68811	down
pmb0197	N2-methylguanosine	Nucleotide and derivates	197000	251000	230000	5550000	4170000	3540000	1.22142	19.5575	4.28965	up
pmb0247	p-Aminobenzoate	Organic acids and derivatives	431000	567000	241000	3610000	4770000	6750000	1.19372	12.2115	3.61016	up
pmb0277	Tricin	Flavone	169000	174000	218000	86900	86100	69100	1.18877	0.431551	-1.2124	down
pmb0296	MAG (18:1) isomer2	Lipids	8450000	13400000	6680000	975000	422000	1020000	1.18077	0.0847178	-3.56119	down
pmb0312	5-methoxyindole-3-carbaldehyde	Indole derivatives	113000	120000	86500	21100	37200	26900	1.17895	0.266667	-1.90689	down
pmb0374	Aminopurine	Others	437000	556000	509000	3170000	2420000	2170000	1.21168	5.16644	2.36917	up
pmb0382	O-Feruloyl 4-hydroxylcoumarin	Phenylpropanoids	2150000	2000000	1920000	3970000	4290000	4900000	1.20866	2.16804	1.11639	up
pmb0449	2-Aminoadipic acid (L-Homoglutamic acid)	Amino acid and derivatives	301000	490000	451000	189000	118000	78500	1.1046	0.310386	-1.68786	down
pmb0464	Aspartic acid di-O-glucoside	Amino acid and derivatives	323000	1000000	929000	2800000	3700000	2850000	1.10268	4.15187	2.05376	up
pmb0484	Choline	Alkaloids	146000000	178000000	178000000	72800000	43600000	56700000	1.17634	0.344821	-1.53608	down
pmb0490	N-p-Coumaroyl putrescine	Phenolamides	54200	84900	124000	1620000	1780000	863000	1.19429	16.203	4.01819	up
pmb0505	N'-p-Coumaroyl putrescine	Phenolamides	65400	93200	199000	2440000	2210000	1150000	1.18005	16.2192	4.01963	up
pmb0550	Cyanidin 3-O-glucoside (Kuromanin)	Anthocyanins	17100000	16500000	13700000	2230000	1550000	2070000	1.21822	0.123679	-3.01533	down
pmb0563	Peonidin	Anthocyanins	95200	53900	30900	10300	12400	10700	1.13307	0.185556	-2.43008	down
pmb0565	Syringetin 3-O-hexoside	Flavonol	5980000	5210000	4360000	1200000	979000	658000	1.19685	0.182444	-2.45448	down
pmb0595	Isorhamnetin 5-O-hexoside	Flavonol	214000	164000	250000	9	9	9	1.2275	4.29936e-05	-14.5055	down
pmb0607	Chrysoeriol 7-O-hexoside	Flavone	9	9	9	286000	201000	127000	1.22622	22740.7	14.473	up
pmb0712	Tricin 5-O-hexosyl-O-hexoside	Flavone	131000	124000	111000	50100	27200	45200	1.16008	0.334699	-1.57906	down
pmb0713	Tricin 7-O-hexosyl-O-hexoside	Flavone	242000	184000	237000	57800	47700	28500	1.18362	0.202112	-2.30678	down
pmb0736	Tricin 7-O-hexoside	Flavone	7570000	6330000	6150000	2960000	2660000	2570000	1.21004	0.408479	-1.29167	down
pmb0769	N-hexosyl-p-coumaroyl serotonin	Alkaloids	96900	117000	127000	380000	319000	378000	1.21021	3.15928	1.6596	up
pmb0782	Piperidine	Alkaloids	4060000	3870000	4760000	14800000	9030000	9790000	1.15871	2.64933	1.40563	up
pmb0785	Isoquinoline	Alkaloids	100000	80700	104000	9	9	9	1.22766	9.48367e-05	-13.3642	down
pmb0800	Niacinamide	Vitamins and derivatives	13400000	12600000	15300000	2220000	2250000	2590000	1.2234	0.170944	-2.5484	down
pmb0818	Methoxyindoleacetic acid	Indole derivatives	1090000	1320000	1590000	11500000	8910000	9800000	1.21721	7.5525	2.91695	up
pmb0819	3-Indoleacetonitrile	Indole derivatives	102000	35700	42500	547000	478000	696000	1.17838	9.5505	3.25558	up
pmb0824	Syringic acid O-feruloyl-O-hexoside	Organic acids and derivatives	9	9	9	77900	30200	56600	1.22513	6100	12.5746	up
pmb0829	Phosphoric acid	Organic acids and derivatives	15200000	7020000	9740000	1720000	1340000	980000	1.18636	0.126408	-2.98384	down
pmb0848	LysoPC 16:1 (2n isomer)	Lipids	4240000	6000000	9700000	882000	612000	798000	1.1918	0.114945	-3.12099	down
pmb0852	LysoPC 18:2	Lipids	5240000	7200000	8950000	3130000	2030000	2320000	1.1461	0.349696	-1.51583	down
pmb0873	LysoPC 18:2 (2n isomer)	Lipids	2040000	3870000	4740000	1590000	1130000	1060000	1.06654	0.35493	-1.4944	down
pmb0874	LysoPE 18:2 (2n isomer)	Lipids	25000000	29700000	25300000	9030000	8000000	8230000	1.21928	0.31575	-1.66315	down
pmb0882	LysoPC 18:1	Lipids	15100000	21400000	24700000	2800000	1690000	2660000	1.2035	0.11683	-3.09752	down
pmb0889	Punicic acid	Lipids	6510000	12000000	31300000	1270000	1440000	1340000	1.14119	0.081309	-3.62044	down
pmb0890	MAG (18:2)	Lipids	928000	755000	549000	330000	264000	393000	1.1083	0.442204	-1.17722	down
pmb0896	N'-Feruloyl putrescine	Phenolamides	323000	499000	438000	4540000	3940000	4540000	1.21979	10.3333	3.36923	up
pmb0964	iP7G	Nucleotide and derivates	144000	186000	187000	9	9	9	1.22753	5.22244e-05	-14.2249	down
pmb1096	Indole	Indole derivatives	1420000	1470000	1800000	12400000	10200000	8220000	1.21363	6.57143	2.71621	up
pmb1178	O-Feruloyl 2-hydroxylcoumarin	Phenylpropanoids	72700	116000	140000	1440000	1160000	1570000	1.21106	12.6863	3.6652	up
pmb1240	Phellodensin F	Others	9	9	9	1490000	1510000	1220000	1.22763	156296	17.2539	up
pmb1318	8-Methyl-2-oxo-4-phenyl-2H-chromen-7-yl 4-(hexyloxy)benzoate	Organic acids and derivatives	730000	671000	607000	1520000	2010000	2150000	1.1972	2.82869	1.50013	up
pmb1530	Phytocassane D	Terpene	7010	16100	18500	9	9	9	1.2234	0.000648882	-10.5898	down
pmb1574	Octadecadien-6-ynoic acid	Lipids	545000	991000	1640000	160000	197000	150000	1.14914	0.159635	-2.64715	down
pmb2222	Phytocassane C	Terpene	1560000	2120000	2230000	12600000	15300000	14000000	1.21818	7.08968	2.82572	up
pmb2228	LysoPC 19:0	Lipids	143000	158000	300000	54900	50500	31300	1.14143	0.227454	-2.13635	down
pmb2260	LysoPC 15:1	Lipids	1440000	2500000	4740000	208000	161000	148000	1.18746	0.0595622	-4.06946	down
pmb2319	LysoPC 15:0	Lipids	6590000	11300000	31300000	1700000	1150000	1110000	1.13706	0.0805042	-3.63479	down
pmb2363	MAG (18:1) isomer1	Lipids	8950000	10700000	4640000	647000	660000	639000	1.20157	0.0801153	-3.64178	down
pmb2388	LysoPC 18:0 (2n isomer)	Lipids	3910000	4130000	6280000	890000	358000	546000	1.18151	0.125279	-2.99678	down
pmb2556	Syringaldehyde O-glucoside	Organic acids and derivatives	14300	15700	14600	190000	280000	270000	1.22306	16.5919	4.05241	up
pmb2561	N-Acetylmethionine	Amino acid and derivatives	231000	232000	204000	54900	58400	48300	1.22177	0.242279	-2.04526	down
pmb2591	Acetyl tryptophan	Amino acid and derivatives	925000	926000	798000	371000	376000	306000	1.2085	0.397508	-1.33094	down
pmb2620	3,4-Dimethoxycinnamic acid	Phenylpropanoids	3250	11100	31800	9	9	9	1.20702	0.000585049	-10.7392	down
pmb2654	Anthranilate O-hexosyl-O-hexoside	Organic acids and derivatives	1970000	1850000	2310000	5810000	5350000	5370000	1.21457	2.69657	1.43113	up
pmb2778	9,10-EODE	Lipids	247000	520000	1730000	52100	39800	22400	1.12557	0.0457749	-4.4493	down
pmb2786	9-HOTrE	Lipids	22500	29500	67800	6530	8970	6430	1.12559	0.183055	-2.44965	down
pmb2789	13-HpOTrE(r)	Lipids	93900	152000	321000	16100	7380	10000	1.17417	0.059058	-4.08172	down
pmb2804	13-HPODE	Lipids	124000	199000	752000	54200	40300	46400	1.04062	0.13107	-2.93159	down
pmb2835	Syringaldehyde	Phenylpropanoids	30200	24400	23600	150000	124000	131000	1.21927	5.17903	2.37268	up
pmb2848	3(2'-Chlorophenyl)-7-hydroxy-4-phenylcoumarin	Phenylpropanoids	11400	25000	29000	9	9	9	1.22423	0.000412844	-11.2421	down
pmb2871	2,5-dihydroxy benzoic acid O-hexside	Organic acids and derivatives	240000	154000	210000	539000	652000	492000	1.17449	2.78642	1.47841	up
pmb2938	4-O-Caffeoyl quinic acid (criptochlorogenic acid)	Organic acids and derivatives	43400	46800	53300	191000	160000	129000	1.19969	3.34495	1.74198	up
pmb2940	1-O-beta-D-Glucopyranosyl sinapate	Phenylpropanoids	5700000	5770000	6400000	13200000	12800000	13800000	1.22064	2.2272	1.15523	up
pmb2957	Cyanidin O-syringic acid	Anthocyanins	69700	59000	53400	26700	25800	19200	1.18339	0.39374	-1.34469	down
pmb3023	Eriodictyol C-hexoside	Flavone	1360000	1590000	1350000	187000	220000	204000	1.22412	0.142093	-2.81509	down
pmb3024	Luteolin C-hexoside	Flavone	28600	20000	23600	9	9	9	1.22742	0.000373961	-11.3848	down
pmb3028	Tricin O-sinapic acid	Flavone	174000	170000	164000	83700	57800	110000	1.0937	0.495079	-1.01427	down
pmb3041	Tricin O-saccharic acid	Flavone	9	9	9	489000	680000	544000	1.22757	63444.4	15.9532	up
pmb3044	Tricin di-O-hexoside	Flavone	141000	107000	116000	29900	22200	21700	1.21211	0.202747	-2.30225	down
pmb3066	5-O-p-coumaroyl shikimic acid O-hexoside	Organic acids and derivatives	163000	141000	209000	84900	92700	71900	1.14794	0.486355	-1.03992	down
pmb3072	3-O-p-coumaroyl shikimic acid O-hexoside	Organic acids and derivatives	133000	105000	109000	49300	50800	40100	1.19719	0.404035	-1.30745	down
pmb3088	Trehalose 6-phosphate	Carbohydrates	184000	190000	170000	944000	980000	933000	1.22674	5.25184	2.39282	up
pmb3107	Syringic acid O-glucoside	Organic acids and derivatives	562000	547000	451000	3920000	5170000	5690000	1.2199	9.47436	3.24403	up
pmb3110	Vanillic acid	Phenylpropanoids	28700	24500	23100	59600	66600	77700	1.20322	2.67235	1.41811	up
pmb3114	Epicatechin-epiafzelechin	Polyphenol	1650000	1230000	1250000	421000	244000	552000	1.13673	0.294673	-1.76281	down
pmb3121	LysoPE 18:1	Lipids	28700000	33600000	31700000	2600000	1450000	1960000	1.21821	0.0639362	-3.96722	down
pmb3132	LysoPE 18:1 (2n isomer)	Lipids	33500000	36700000	35000000	2730000	1690000	2080000	1.22166	0.0617871	-4.01655	down
pmb3894	Di-O-methylquercetin	Flavonol	2040000	3260000	13100000	960000	617000	806000	1.02603	0.129511	-2.94885	down
pmc0066	2'-Deoxyinosine-5'-monophosphate	Nucleotide and derivates	28800000	30000000	32000000	9910000	8410000	10400000	1.21851	0.3163	-1.66064	down
pmc0281	Adenosine O-ribose	Nucleotide and derivates	1540000	1470000	1450000	4130000	4300000	3570000	1.21864	2.69058	1.42792	up
pmc0960	LysoPC 20:4	Lipids	25800000	37000000	47500000	5030000	2140000	3640000	1.18856	0.0980054	-3.35099	down
pmd0136	LysoPC 18:0	Lipids	3120000	5730000	42800000	109000000	134000000	61600000	1.00402	5.89739	2.56008	up
pmd0144	LysoPC 20:1 (2n isomer)	Lipids	1120000	1570000	2810000	9	9	9	1.22663	4.90909e-06	-17.6361	down
pme0001	Hesperetin 7-O-neohesperidoside (Neohesperidin)	Flavanone	6340000	6070000	5040000	1980000	2040000	2190000	1.21384	0.355874	-1.49056	down
pme0005	Purine	Nucleotide and derivates	12900000	13500000	9670000	2880000	2120000	1950000	1.2058	0.192681	-2.37571	down
pme0006	L-Proline	Amino acid and derivatives	143000000	152000000	168000000	39900000	35200000	31900000	1.22092	0.231102	-2.1134	down
pme0011	L-Aspartic acid	Amino acid and derivatives	25600000	26900000	25100000	2160000	2980000	2330000	1.22323	0.0962629	-3.37688	down
pme0013	L-Glutamic acid	Amino acid and derivatives	29100000	27600000	24800000	1390000	1770000	1750000	1.22491	0.0602454	-4.05301	down
pme0016	L-(-)-Cystine	Amino acid and derivatives	270000	263000	312000	26500	69000	39600	1.17705	0.159882	-2.64492	down
pme0019	L-Leucine	Amino acid and derivatives	318000000	326000000	358000000	1090000000	961000000	953000000	1.22088	2.998	1.584	up
pme0021	L-Phenylalanine	Amino acid and derivatives	42200000	47700000	58100000	19700000	23000000	21300000	1.19172	0.432432	-1.20945	down
pme0030	L-(-)-Tyrosine	Amino acid and derivatives	1380000	1320000	1570000	5050000	3780000	3570000	1.19655	2.90398	1.53803	up
pme0033	Hypoxanthine	Nucleotide and derivates	40500000	39500000	47700000	4950000	6440000	9900000	1.19599	0.166719	-2.58451	down
pme0036	L-Histidine	Amino acid and derivatives	2250000	2250000	2390000	5060000	4630000	4270000	1.2134	2.02612	1.01872	up
pme0040	Adenine	Nucleotide and derivates	44000000	40700000	40100000	6250000	4620000	4100000	1.21933	0.119952	-3.05947	down
pme0041	L-Isoleucine	Amino acid and derivatives	303000000	310000000	337000000	1060000000	957000000	932000000	1.22245	3.10421	1.63423	up
pme0085	Rosmarinic acid	Organic acids and derivatives	32100	36000	22600	73000	67500	47900	1.08991	2.07718	1.05462	up
pme0108	5-Methylcytosine	Nucleotide and derivates	1570000	1480000	1250000	629000	489000	329000	1.15649	0.336512	-1.57127	down
pme0109	(-)-3-(3,4-Dihydroxyphenyl)-2-methylalanine	Amino acid and derivatives	610000	709000	738000	338000	370000	270000	1.17829	0.47545	-1.07264	down
pme0113	γ-Glu-Cys	Amino acid and derivatives	40100	47200	43400	92900	142000	102000	1.17844	2.57766	1.36606	up
pme0122	N6-Acetyl-L-lysine	Amino acid and derivatives	375000	465000	511000	1950000	1320000	994000	1.14447	3.15618	1.65818	up
pme0124	Glycyl-L-proline	Amino acid and derivatives	43200	50700	40600	9	9	9	1.22751	0.000200743	-12.2824	down
pme0128	D-Alanyl-D-Alanine	Amino acid and derivatives	8640	3920	9260	17100	23300	18700	1.07324	2.70852	1.43751	up
pme0132	Asp-phe	Amino acid and derivatives	10000	8980	10700	89600	111000	83000	1.22254	9.55526	3.25629	up
pme0171	N-Isovaleroylglycine	Amino acid and derivatives	9	9	9	39000	35800	18500	1.22549	3455.56	11.7547	up
pme0174	N-Propionylglycine	Amino acid and derivatives	230000	195000	254000	824000	548000	503000	1.15992	2.76141	1.46541	up
pme0183	2-Hydroxy-6-aminopurine	Nucleotide and derivates	24300000	22800000	23000000	4880000	3560000	2740000	1.2089	0.159486	-2.64849	down
pme0191	N-Glycyl-L-leucine	Amino acid and derivatives	1970000	2110000	1890000	21600000	20000000	17800000	1.22578	9.94975	3.31466	up
pme0197	Quercetin 3-O-rutinoside (Rutin)	Flavonol	5770000	5790000	5280000	1730000	1530000	1740000	1.22313	0.296912	-1.75189	down
pme0207	3-Hydroxybutyrate	Organic acids and derivatives	9	9	9	364000	246000	196000	1.22686	29851.9	14.8655	up
pme0226	L-Asparagine	Amino acid and derivatives	15300000	14900000	15300000	2240000	4900000	3290000	1.17656	0.229231	-2.12513	down
pme0230	Adenosine	Nucleotide and derivates	2190000	2640000	3080000	15300000	11300000	12100000	1.21009	4.89254	2.29058	up
pme0247	trans-4-Hydroxy-L-proline	Amino acid and derivatives	55600	81500	81000	32600	23700	30000	1.16059	0.39569	-1.33756	down
pme0249	Azelaic acid	Organic acids and derivatives	175000	196000	334000	79000	57000	50900	1.15423	0.265106	-1.91536	down
pme0258	Uracil	Nucleotide and derivates	680000	615000	541000	293000	257000	233000	1.19938	0.426471	-1.22948	down
pme0264	Thymidine	Nucleotide and derivates	98100	98300	80200	199000	223000	309000	1.17433	2.64281	1.40207	up
pme0274	6-Aminocaproic acid	Organic acids and derivatives	20400000	21200000	22600000	88000000	71000000	66000000	1.21425	3.50467	1.80928	up
pme0275	4-Oxopentanoate	Organic acids and derivatives	9	9	9	37800	24000	15000	1.22471	2844.44	11.4739	up
pme0279	2,6-Diaminooimelic acid	Amino acid and derivatives	468000	369000	438000	106000	133000	103000	1.21228	0.268235	-1.89843	down
pme0286	2-Hydroxyisocaproic acid	Organic acids and derivatives	71300	84500	58100	14700000	13500000	16000000	1.22676	206.639	7.69097	up
pme0300	trans-Cinnamate	Phenylpropanoids	9	9	9	1080000	912000	590000	1.22703	95629.6	16.5452	up
pme0303	Caffeate	Phenylpropanoids	4040000	4010000	5300000	1160000	1270000	1940000	1.16804	0.327341	-1.61113	down
pme0309	Methyl gallate	Organic acids and derivatives	388000	288000	283000	48100	64100	46000	1.21218	0.164964	-2.59978	down
pme0369	Kaempferol 3-O-rutinoside (Nicotiflorin)	Flavonol	4010000	3630000	3900000	1510000	1380000	1690000	1.21565	0.39688	-1.33322	down
pme0377	Naringenin	Flavanone	1310000	962000	752000	82500	59300	71200	1.21561	0.0704365	-3.82753	down
pme0397	Shikimic acid	Organic acids and derivatives	949000	854000	668000	44800	135000	110000	1.16931	0.11728	-3.09197	down
pme0408	Syringic acid	Phenylpropanoids	9	9	9	64000	54700	44200	1.22729	6033.33	12.5587	up
pme0418	3-(4-Hydroxyphenyl)propionic acid	Phenylpropanoids	33600	31000	42700	103000	77100	125000	1.16589	2.84343	1.50763	up
pme0434	Procyanidin B2	Proanthocyanidins	1420000	1140000	1070000	408000	338000	474000	1.19416	0.336088	-1.57309	down
pme0474	4-Hydroxybenzoic acid	Organic acids and derivatives	1980000	1040000	993000	4490000	4110000	3900000	1.14634	3.11488	1.63918	up
pme0490	Nicotinic acid	Vitamins and derivatives	4310000	2370000	3190000	1410000	1190000	2080000	1.03389	0.474164	-1.07654	down
pme0500	D(+)-Melezitose	Carbohydrates	57100	49700	39500	8350000	5810000	6000000	1.22517	137.799	7.10642	up
pme0519	D-(+)-Sucrose	Carbohydrates	246000	215000	250000	3690000	4530000	2970000	1.22185	15.7384	3.97622	up
pme1002	L-Tyramine	Amino acid and derivatives	58300000	55600000	46300000	10700000	10700000	10200000	1.22273	0.197253	-2.34188	down
pme1018	Glutathione oxidized	Amino acid and derivatives	580000	584000	836000	74500	78000	114000	1.20849	0.13325	-2.90779	down
pme1063	Uridine	Nucleotide and derivates	245000	179000	224000	87700	86400	71300	1.19589	0.378704	-1.40086	down
pme1119	Inosine	Nucleotide and derivates	697000	425000	472000	253000	284000	229000	1.11813	0.480552	-1.05724	down
pme1194	Deoxycytidine	Nucleotide and derivates	1580000	1830000	2090000	806000	509000	426000	1.16009	0.316545	-1.65952	down
pme1218	2-Picolinic acid	Organic acids and derivatives	1080000	1090000	613000	322000	374000	394000	1.12187	0.391664	-1.35231	down
pme1242	S-(methyl)glutathione	Amino acid and derivatives	667000	804000	751000	301000	398000	388000	1.17783	0.489199	-1.03151	down
pme1283	S-(5'-Adenosy)-L-homocysteine	Amino acid and derivatives	62800	69200	65300	132000	151000	125000	1.20985	2.06792	1.04818	up
pme1292	Homogentisic acid	Organic acids and derivatives	124000	103000	152000	335000	475000	533000	1.18065	3.54354	1.82519	up
pme1310	N'-Formylkynurenine	Amino acid and derivatives	73800	66100	48200	9	9	9	1.22716	0.000143541	-12.7663	down
pme1322	Nα-Acetyl-L-arginine	Amino acid and derivatives	169000	189000	198000	1020000	960000	952000	1.2253	5.27338	2.39873	up
pme1368	L-Pipecolic acid	Amino acid and derivatives	109000	141000	114000	23200	32500	37400	1.19369	0.255769	-1.96709	down
pme1373	2'-Deoxycytidine-5'-monophosphate	Nucleotide and derivates	6580	5520	9920	22000	12100	28700	1.04875	2.85195	1.51195	up
pme1398	Delphinidin 3-O-glucoside (Mirtillin)	Anthocyanins	6210000	11200000	8340000	940000	588000	1170000	1.19473	0.104777	-3.25461	down
pme1408	L-Glutamine	Amino acid and derivatives	14100000	17500000	14600000	1200000	2070000	1470000	1.21366	0.102597	-3.28493	down
pme1417	L-Tryptamine	Alkaloids	54600000	43400000	42700000	22400000	21400000	22000000	1.20101	0.467662	-1.09646	down
pme1434	Syringin	Phenylpropanoids	66900	42800	55200	120000	151000	123000	1.16244	2.38933	1.2566	up
pme1474	5'-Deoxy-5'-(methylthio)adenosine	Nucleotide and derivates	2120000	2010000	2680000	1120000	809000	765000	1.17183	0.395595	-1.3379	down
pme1514	Epigallocatechin (EGC)	Polyphenol	823000	953000	815000	266000	305000	477000	1.14117	0.404477	-1.30587	down
pme1535	(+)-Gallocatechin (GC)	Polyphenol	822000	958000	742000	321000	286000	491000	1.12928	0.435369	-1.19969	down
pme1539	Isorhamnetin 3-O-neohesperidoside	Flavonol	397000	406000	445000	162000	153000	144000	1.22238	0.367788	-1.44305	down
pme1583	Eriodictyol	Flavanone	101000	103000	82600	45800	33900	51500	1.15363	0.457781	-1.12727	down
pme1600	7-O-Methyleriodictyol	Flavanone	252000	260000	214000	21400	27300	16900	1.21827	0.0903581	-3.4682	down
pme1605	Kaempferol 3-O-robinobioside (Biorobin)	Flavonol	3830000	2860000	3370000	1410000	1390000	1620000	1.19472	0.439364	-1.18651	down
pme1622	Kaempferol 3-O-glucoside (Astragalin)	Flavonol	465000	295000	225000	67200	50600	48500	1.18565	0.168832	-2.56634	down
pme1637	Coniferyl alcohol	Phenylpropanoids	9	9	9	114000	39000	17400	1.21727	6311.11	12.6237	up
pme1643	(+)-piperitol	Terpene	9	9	9	6170	8550	10100	1.22678	919.259	9.84433	up
pme1692	Inosine 5'-monophosphate	Nucleotide and derivates	33300	37000	35500	94000	103000	94700	1.2237	2.75709	1.46315	up
pme1695	Sinapic acid	Phenylpropanoids	523000	510000	556000	3100000	3430000	3660000	1.22567	6.41284	2.68096	up
pme1711	3-Hydroxy-3-methyl butyric acid	Organic acids and derivatives	2260000	2420000	2570000	5750000	6700000	6470000	1.21862	2.60966	1.38386	up
pme1712	L-Saccharopine	Amino acid and derivatives	369000	368000	445000	65700	51000	83400	1.2097	0.169289	-2.56244	down
pme1730	D-Erythronolactone	Organic acids and derivatives	76000	54300	61800	571000	641000	727000	1.22109	10.0937	3.33538	up
pme1773	Cyanidin 3-O-rutinoside (Keracyanin)	Anthocyanins	2800000	1930000	2730000	1030000	814000	1290000	1.13632	0.420107	-1.25117	down
pme1846	D(+)-Glucose	Carbohydrates	581000	623000	731000	5300000	3040000	6400000	1.19525	7.61757	2.92933	up
pme1944	D-Mannitol	Alcohols	673000	767000	588000	194000	296000	426000	1.06353	0.451677	-1.14664	down
pme2049	2-Hydroxybutanoic acid	Organic acids and derivatives	193000	178000	212000	487000	298000	454000	1.12302	2.12521	1.08761	up
pme2054	L-Tryptophan	Amino acid and derivatives	263000	268000	272000	1700000	1190000	1550000	1.21795	5.52927	2.46709	up
pme2108	L-Carnitine	Alkaloids	46400	54400	69800	166000	151000	170000	1.19513	2.85463	1.5133	up
pme2111	L-ascorbate	Vitamins and derivatives	141000	89700	132000	298000	291000	253000	1.15707	2.32148	1.21504	up
pme2129	(S)-(-)-2-Hydroxyisocaproic acid	Organic acids and derivatives	481000	594000	415000	107000000	99900000	114000000	1.22693	215.369	7.75067	up
pme2241	Citraconic acid	Organic acids and derivatives	5720000	4560000	4180000	16600000	18600000	19400000	1.21318	3.77593	1.91683	up
pme2277	3-Aminosalicylic acid	Organic acids and derivatives	150000	168000	180000	403000	384000	313000	1.19372	2.20884	1.14329	up
pme2292	Putrescine	Phenolamides	221000	315000	363000	4930000	3270000	2650000	1.20586	12.069	3.59323	up
pme2366	Phenethylamine	Others	661000	718000	873000	362000	365000	396000	1.19047	0.498668	-1.00385	down
pme2380	A-Ketoglutaric acid	Organic acids and derivatives	957000	849000	739000	254000	298000	432000	1.15432	0.38664	-1.37094	down
pme2457	Luteolin 7-O-glucoside (Cynaroside)	Flavone	636000	387000	357000	71700	68800	46200	1.19704	0.13529	-2.88587	down
pme2482	Protocatechuic aldehyde	Polyphenol	3930000	3240000	3250000	455000	369000	342000	1.22234	0.1119	-3.15972	down
pme2541	α-Hydroxyisobutyric acid	Organic acids and derivatives	50700	57000	63700	128000	97800	127000	1.17353	2.05834	1.04148	up
pme2550	Cis-Aconitic acid	Organic acids and derivatives	347000	385000	354000	17400	16200	11700	1.22406	0.0417127	-4.58337	down
pme2569	(5-L-Glutamyl)-L-amino acid	Amino acid and derivatives	152000	189000	165000	64800	65500	76900	1.20539	0.409486	-1.28811	down
pme2575	L-Carnosine	Amino acid and derivatives	19700	17000	21000	54700	53500	50600	1.21648	2.75217	1.46057	up
pme2598	3,4-Dihydroxybenzeneacetic acid	Organic acids and derivatives	125000	146000	157000	322000	461000	577000	1.16941	3.17757	1.66792	up
pme2603	3-Hydroxyanthranilic acid	Organic acids and derivatives	9	19500	9	134000	189000	208000	1.00826	27.2057	4.76583	up
pme2661	Vitamin D3	Vitamins and derivatives	80700	27200	90200	9	9	9	1.22357	0.000136295	-12.841	down
pme2670	4-Hydroxybenzaldehyde	Organic acids and derivatives	612000	512000	677000	1840000	2260000	2130000	1.2111	3.45919	1.79043	up
pme2698	Phe-Phe	Amino acid and derivatives	21100	28800	13200	140000	187000	111000	1.18395	6.94136	2.79522	up
pme2709	2-Hydroxy-2-methyl butyric acid	Organic acids and derivatives	7790	5940	5960	14900	13100	11800	1.16911	2.02133	1.01531	up
pme2743	N-Phenylacetylglycine	Amino acid and derivatives	9	9	9	1260000	891000	1110000	1.22754	120778	16.882	up
pme2761	4-Hydroxy-2-oxoglutaric acid	Organic acids and derivatives	76900	45800	80500	977000	1070000	1150000	1.21625	15.7333	3.97575	up
pme2827	Palmitaldehyde	Lipids	27700000	28900000	16200000	4100000	9940000	3710000	1.10128	0.243819	-2.03612	down
pme2830	O-Phosphorylethanolamine	Others	257000	282000	460000	968000	911000	841000	1.15467	2.72272	1.44505	up
pme2836	5-Hydroxytryptophol	Indole derivatives	1310000	1410000	733000	657000	465000	575000	1.01546	0.491457	-1.02486	down
pme2884	Guanidinoethyl sulfonate	Organic acids and derivatives	25100	17200	22300	35700	33500	61100	1.02758	2.01703	1.01223	up
pme2890	L-Homocystine	Amino acid and derivatives	77100	71200	69300	575000	627000	401000	1.21518	7.36673	2.88102	up
pme2898	Dihydromyricetin	Flavonol	2190000	1860000	1780000	787000	466000	447000	1.17524	0.291595	-1.77796	down
pme2914	3-Hydroxy-3-methylpentane-1,5-dioic acid	Amino acid and derivatives	2790000	2400000	2410000	386000	538000	419000	1.21782	0.176711	-2.50054	down
pme2949	Hesperetin 7-rutinoside (Hesperidin)	Flavanone	1060000	1070000	1060000	383000	346000	356000	1.2259	0.340125	-1.55586	down
pme2960	Naringenin chalcone	Flavanone	1250000	977000	736000	91100	77200	86000	1.21709	0.0858252	-3.54246	down
pme2993	Scopoletin (7-Hydroxy-5-methoxycoumarin)	Phenylpropanoids	275000	181000	176000	866000	893000	621000	1.18219	3.76582	1.91297	up
pme3009	trans-Citridic acid	Organic acids and derivatives	1030000	1110000	940000	363000	555000	460000	1.16723	0.447403	-1.16035	down
pme3011	γ-aminobutyric acid	Organic acids and derivatives	4630000	6120000	5490000	2490000	2760000	1870000	1.16181	0.438424	-1.1896	down
pme3017	2-Aminoisobutyric acid	Amino acid and derivatives	22000000	30200000	31800000	12600000	8420000	8210000	1.16317	0.347976	-1.52294	down
pme3033	N,N-Dimethylglycine	Amino acid and derivatives	3380000	4780000	4610000	2010000	1690000	1450000	1.16947	0.403289	-1.31011	down
pme3123	Sinapyl alcohol	Phenylpropanoids	42400	26800	32900	168000	273000	246000	1.20175	6.7287	2.75033	up
pme3130	Quercetin 4'-O-glucoside (Spiraeoside)	Flavonol	4040000	3260000	3090000	1270000	1050000	914000	1.20096	0.311261	-1.6838	down
pme3207	trans,trans-Muconic acid	Organic acids and derivatives	211000	212000	276000	96600	89400	86000	1.2041	0.389127	-1.36169	down
pme3208	Glycitin	Isoflavone	9	9	9	147000	53100	36400	1.22208	8759.26	13.0966	up
pme3256	Delphinidin 3-O-rutinoside (Tulipanin)	Anthocyanins	395000	260000	254000	9	9	9	1.22732	2.9703e-05	-15.039	down
pme3267	Kaempferol 3-O-galactoside (Trifolin)	Flavonol	414000	224000	160000	42300	34900	25100	1.17056	0.128195	-2.96358	down
pme3285	Afzelechin (3,5,7,4'-Tetrahydroxyflavan)	Flavanone	1210000	774000	886000	566000	342000	492000	1.07501	0.487805	-1.03562	down
pme3346	5-hydroxyhexanoic acid	Organic acids and derivatives	3210000	2920000	3160000	1320000	1420000	1750000	1.19245	0.483315	-1.04896	down
pme3434	Eudesmic acid (3,4,5-trimethoxybenzoic acid)	Organic acids and derivatives	9	9	9	119000	156000	159000	1.22757	16074.1	13.9724	up
pme3443	Sinapinaldehyde	Phenylpropanoids	201000	170000	167000	1870000	1790000	1730000	1.22578	10.0186	3.32461	up
pme3453	p-Coumaraldehyde	Phenylpropanoids	9	9	9	45500	14900	17900	1.22277	2900	11.5018	up
pme3475	Butin	Flavone	1220000	931000	744000	69200	67500	70600	1.22032	0.0716062	-3.80377	down
pme3732	Cytidine	Nucleotide and derivates	112000	169000	137000	821000	797000	732000	1.21595	5.62201	2.49109	up
pme3835	Guanosine 3',5'-cyclic monophosphate	Nucleotide and derivates	27100	31900	25100	125000	137000	163000	1.2183	5.05351	2.33729	up
pme3970	β-Pseudouridine	Nucleotide and derivates	15800	52900	71700	374000	270000	304000	1.11823	6.75214	2.75534	up
pme3983	Hypoxanthine-9-β-D-arabinofuranoside	Nucleotide and derivates	109000	83000	113000	192000	228000	205000	1.17393	2.04918	1.03505	up
pmf0017	DL-Homocysteine	Amino acid and derivatives	79200	50000	101000	186000	300000	226000	1.12557	3.09296	1.62899	up
pmf0027	Cyanidin 3-O-galactoside	Anthocyanins	12700000	15900000	14100000	2540000	1520000	2020000	1.21135	0.142389	-2.81209	down
pmf0032	Galactinol	Carbohydrates	1050000	1090000	1090000	16500000	14500000	14700000	1.22703	14.1486	3.82259	up
pmf0057	4,2',4',6'-Tetrahydroxychalcone	Flavone	333000	226000	179000	16500	10700	11500	1.21372	0.052439	-4.25322	down
pmf0058	4',5,7-Trihydroxyflavanone	Flavanone	316000	236000	190000	19500	12600	17000	1.21515	0.0661725	-3.91762	down
pmf0068	Mannitol	Alcohols	92900	175000	157000	77700	54800	73800	1.03256	0.485526	-1.04238	down
pmf0104	Caffeic acid	Phenylpropanoids	470000	414000	442000	37400	61500	90000	1.18881	0.142459	-2.81139	down
pmf0123	Methyl ferulate	Phenylpropanoids	9	9	9	12000000	8520000	10900000	1.2276	1.1637e+06	20.1503	up
pmf0138	D-(+)-Mannose	Carbohydrates	879000	899000	1020000	19100000	10600000	11300000	1.21454	14.6533	3.87316	up
pmf0139	D-(+)-Galactose	Carbohydrates	982000	987000	1030000	12800000	11300000	13700000	1.22646	12.6042	3.65583	up
pmf0178	Ethyl caffeate	Organic acids and derivatives	47100	95200	283000	9	9	9	1.22043	6.34846e-05	-13.9432	down
pmf0208	Isoquercitroside	Flavonoid	3400000	2450000	3280000	1370000	992000	1050000	1.18002	0.373713	-1.42	down
pmf0218	Phosphoenolpyruvate trisodium salt	Organic acids and derivatives	235000	246000	169000	60800	76100	90700	1.1693	0.350154	-1.51394	down
pmf0230	Forchlorfenuron	Others	127000	14600	12500	9	9	9	1.20736	0.000175211	-12.4786	down
pmf0253	6-Benzylaminopurine	Nucleotide and derivates	29700	36400	30900	150000	111000	99900	1.2014	3.72062	1.89554	up
pmf0282	Melibiose	Carbohydrates	130000	170000	94000	1940000	1580000	1610000	1.21614	13.0203	3.70269	up
pmf0284	4-Hydroxy-3-methoxycinnamaldehyde	Phenylpropanoids	10800	9	9	244000	95300	92200	1.02269	39.8872	5.31785	up
pmf0286	Phytol	Terpene	9590000	18500000	41200000	3060000	3500000	3220000	1.10988	0.141146	-2.82474	down
pmf0292	D-erythro-sphinganine	Amino acid and derivatives	123000	159000	92900	441000	827000	910000	1.17199	5.80955	2.53843	up
pmf0295	Skimmin	Phenylpropanoids	1190000	1630000	1270000	143000	174000	476000	1.1252	0.193888	-2.36671	down
pmf0319	Acetosyringone	Phenylpropanoids	9	9	9	201000	181000	240000	1.22761	23037	14.4917	up
pmf0324	Nornicotine	Alkaloids	171000	181000	195000	79800	83300	104000	1.1904	0.4883	-1.03416	down
pmf0338	Roseoside	Terpene	988000	1120000	867000	441000	392000	396000	1.20587	0.413109	-1.2754	down
pmf0345	(-)-Epiafzelechin	Polyphenol	33000000	22500000	24700000	9890000	4440000	11900000	1.0778	0.327057	-1.61238	down
pmf0348	2,6-Dimethyl-7-octene-2,3,6-triol	Alcohols	609000	548000	1070000	231000	187000	235000	1.1523	0.29322	-1.76995	down
pmf0360	Astilbin	Flavonoid	754000	669000	604000	197000	167000	164000	1.21785	0.260483	-1.94074	down
pmf0369	Persicoside	Flavonoid	55600	40000	28300	16800	19900	17700	1.09273	0.439064	-1.1875	down
pmf0395	Oleic acid	Lipids	30300000	35600000	17400000	9	9	9	1.2271	3.24129651860744e-7	-21.5569	down
pmf0403	L-Hyoscyamine	Alkaloids	183000	178000	121000	52100	43200	111000	1.00774	0.428008	-1.22429	down
pmf0418	Curdione	Others	926000	1270000	1170000	490000	380000	331000	1.18012	0.356803	-1.4868	down
pmf0441	N-Acetyl-L-phenylalanine	Amino acid and derivatives	3790000	3400000	3140000	928000	1030000	890000	1.22062	0.275702	-1.85882	down
pmf0446	Gentiopicroside	Terpene	21400	30700	21000	9	9	9	1.22697	0.000369357	-11.4027	down
pmf0467	Morroniside	Terpene	161000	183000	187000	52700	57000	79800	1.18754	0.356874	-1.48651	down
pmf0484	alpha-Aminocaproic acid	Amino acid and derivatives	315000000	332000000	357000000	1080000000	1000000000	989000000	1.22342	3.05677	1.61201	up
pmf0485	Panose	Carbohydrates	44300	40100	58500	5210000	7060000	9150000	1.22392	149.895	7.22781	up
pmf0504	Nandrolone	Others	24600	59900	248000	9	9	9	1.21444	8.1203e-05	-13.5881	down
pmf0514	alpha-Cyperone	Others	185000	254000	182000	30400	53600	63500	1.16188	0.23752	-2.07388	down
pmf0527	Osthole	Phenylpropanoids	197000	230000	164000	65300	44400	57000	1.1945	0.282064	-1.8259	down
pmf0528	Cytisine	Alkaloids	66200	26400	55900	18500	9740	17400	1.05111	0.30734	-1.70209	down
pmf0559	Abrine	Alkaloids	25300	44600	43200	1500000	1330000	1210000	1.22076	35.7206	5.15868	up
pmf0582	Glabridin	Flavonoid	9	9	9	24500	23000	31300	1.22746	2918.52	11.511	up
pmf0585	Proline	Amino acid and derivatives	153000000	152000000	169000000	37700000	35600000	24400000	1.20978	0.206118	-2.27846	down
pmf0587	Aspartic acid	Amino acid and derivatives	25900000	26000000	25400000	2070000	2920000	2410000	1.22321	0.0957309	-3.38487	down
pmf0589	Glutamic acid	Amino acid and derivatives	33100000	29800000	27800000	1420000	2010000	1960000	1.22291	0.0594267	-4.07275	down
pmf0591	Cinnamic acid	Phenylpropanoids	9	9	9	705000	720000	532000	1.22751	72481.5	16.1453	up
pmf0594	D-(+)-Phenylalanine	Amino acid and derivatives	1950000	2110000	2670000	919000	1090000	974000	1.18727	0.443239	-1.17384	down
pmf0611	Chalcone	Flavonoid	9	9	9	150000	118000	55900	1.22504	11996.3	13.5503	up
