# Supplementary material for: Nutritional component changes in Xiangfen 1 banana at different developmental stages
Source: Royal Society of Chemistry journal article supplement (doi:10.1039/d0fo00999g), 2020-01-01
Supplement: d0fo00999g3.xlsx [file d0fo00999g3.xlsx]

## Sheet: Sheet1
Table 4 Differential metabolites between young fruit and mature green fruit
Index	Compounds	Class	youngfruit1	youngfruit2	youngfruit3	maturegreenfruit1	maturegreenfruit2	maturegreenfruit3	VIP	Fold_Change	Log2FC	Type
pma0134	D(-)-Threose	Carbohydrates	18100000	19000000	16700000	5710000	4770000	5380000	1.34015	0.294796	-1.76221	down
pma0948	Hydroxyphenethylamine	Others	34800000	30500000	30000000	11300000	8330000	9510000	1.32988	0.305771	-1.70948	down
pma6281	Methylglutaric acid	Organic acids and derivatives	157000	162000	151000	82000	63600	88600	1.29317	0.498298	-1.00492	down
pma6353	Chrysin C-hexoside	Flavone	73000	76800	78100	32500	37400	42100	1.31546	0.491444	-1.0249	down
pma6455	Ribulose-5-phosphate	Carbohydrates	215000	119000	211000	67900	69000	97200	1.18108	0.429541	-1.21913	down
pma6499	Limocitrin O-hexoside	Flavone	4980000	5100000	4870000	638000	810000	1080000	1.32759	0.169097	-2.56408	down
pma6576	Spinacetin	Flavone	1550000	995000	1140000	548000	426000	514000	1.27859	0.403799	-1.30829	down
pmb0069	Benzamide	Others	624000	360000	968000	1470000	1400000	1500000	1.13003	2.23873	1.16268	up
pmb0164	MAG (18:2) isomer1	Lipids	2150000	1780000	2360000	553000	530000	653000	1.32985	0.275994	-1.85729	down
pmb0197	N2-methylguanosine	Nucleotide and derivates	197000	251000	230000	706000	485000	575000	1.30128	2.60472	1.38113	up
pmb0247	p-Aminobenzoate	Organic acids and derivatives	431000	567000	241000	194000	68400	131000	1.11806	0.317514	-1.65511	down
pmb0277	Tricin	Flavone	169000	174000	218000	49900	40800	52300	1.32944	0.254902	-1.97199	down
pmb0296	MAG (18:1) isomer2	Lipids	8450000	13400000	6680000	676000	970000	1160000	1.31365	0.0983526	-3.34589	down
pmb0423	Hydroxy-methoxycinnamate	Phenylpropanoids	4890000	3420000	4090000	8970000	7800000	8940000	1.28716	2.07339	1.05199	up
pmb0490	N-p-Coumaroyl putrescine	Phenolamides	54200	84900	124000	521000	406000	417000	1.29245	5.10832	2.35285	up
pmb0505	N'-p-Coumaroyl putrescine	Phenolamides	65400	93200	199000	623000	566000	793000	1.26302	5.54251	2.47054	up
pmb0550	Cyanidin 3-O-glucoside (Kuromanin)	Anthocyanins	17100000	16500000	13700000	2540000	1790000	2050000	1.33822	0.134884	-2.89021	down
pmb0563	Peonidin	Anthocyanins	95200	53900	30900	17900	13100	21900	1.14428	0.293889	-1.76666	down
pmb0565	Syringetin 3-O-hexoside	Flavonol	5980000	5210000	4360000	475000	817000	911000	1.31499	0.141672	-2.81937	down
pmb0569	Syringetin 5-O-hexoside	Flavone	229000	375000	244000	151000	63800	110000	1.15684	0.383019	-1.38451	down
pmb0602	Syringetin 7-O-hexoside	Flavone	963000	614000	609000	204000	181000	234000	1.30183	0.283166	-1.82028	down
pmb0615	Hesperetin C-hexosyl-O-hexosyl-O-hexoside	Flavone	109000	96500	133000	9	14500	9	1.10266	0.0428892	-4.54324	down
pmb0712	Tricin 5-O-hexosyl-O-hexoside	Flavone	131000	124000	111000	54100	39900	79800	1.18951	0.474863	-1.07442	down
pmb0713	Tricin 7-O-hexosyl-O-hexoside	Flavone	242000	184000	237000	94200	68900	83800	1.30625	0.372398	-1.42508	down
pmb0736	Tricin 7-O-hexoside	Flavone	7570000	6330000	6150000	3150000	2580000	3130000	1.31526	0.441895	-1.17822	down
pmb0769	N-hexosyl-p-coumaroyl serotonin	Alkaloids	96900	117000	127000	237000	380000	342000	1.28498	2.81314	1.49218	up
pmb0789	Pyridoxine O-glucoside	Vitamins and derivatives	6410000	7480000	7760000	18100000	14500000	17700000	1.31846	2.32333	1.21619	up
pmb0818	Methoxyindoleacetic acid	Indole derivatives	1090000	1320000	1590000	6100000	6240000	3830000	1.29758	4.0425	2.01525	up
pmb0829	Phosphoric acid	Organic acids and derivatives	15200000	7020000	9740000	2880000	2110000	3250000	1.25665	0.257822	-1.95555	down
pmb0863	LysoPC 16:2 (2n isomer)	Lipids	392000	733000	1030000	4860000	3910000	2380000	1.24246	5.17401	2.37128	up
pmb0882	LysoPC 18:1	Lipids	15100000	21400000	24700000	4460000	5410000	6870000	1.28888	0.273529	-1.87023	down
pmb0890	MAG (18:2)	Lipids	928000	755000	549000	475000	223000	285000	1.13939	0.440412	-1.18307	down
pmb0896	N'-Feruloyl putrescine	Phenolamides	323000	499000	438000	3280000	1870000	2550000	1.31453	6.11111	2.61143	up
pmb0998	Guanosine 5'-monophosphate	Nucleotide and derivates	244000	218000	236000	829000	433000	310000	1.0485	2.25215	1.1713	up
pmb1096	Indole	Indole derivatives	1420000	1470000	1800000	6750000	6880000	4240000	1.30149	3.81023	1.92988	up
pmb1178	O-Feruloyl 2-hydroxylcoumarin	Phenylpropanoids	72700	116000	140000	233000	271000	160000	1.1053	2.02008	1.01441	up
pmb1318	8-Methyl-2-oxo-4-phenyl-2H-chromen-7-yl 4-(hexyloxy)benzoate	Organic acids and derivatives	730000	671000	607000	1670000	1550000	1080000	1.25326	2.14143	1.09858	up
pmb2325	MAG (18:3) isomer2	Lipids	23900000	18200000	5430000	3130000	2980000	6170000	1.03833	0.258363	-1.95253	down
pmb2363	MAG (18:1) isomer1	Lipids	8950000	10700000	4640000	789000	545000	1020000	1.30025	0.0969123	-3.36718	down
pmb2369	PC 19:2/16:0	Lipids	9	9	21000	117000	135000	40300	1.05654	13.9071	3.79775	up
pmb2388	LysoPC 18:0 (2n isomer)	Lipids	3910000	4130000	6280000	1690000	1750000	1340000	1.28484	0.333799	-1.58295	down
pmb2406	LysoPC 17:0	Lipids	920000	1690000	14100000	54600000	40200000	19600000	1.10635	6.8462	2.7753	up
pmb2507	2-Deoxyribose 1-phosphate	Others	142000	87400	76600	29100	39500	43400	1.2285	0.366013	-1.45003	down
pmb2561	N-Acetylmethionine	Amino acid and derivatives	231000	232000	204000	74000	68600	74000	1.3427	0.324738	-1.62265	down
pmb2591	Acetyl tryptophan	Amino acid and derivatives	925000	926000	798000	376000	357000	388000	1.33683	0.423179	-1.24066	down
pmb2653	D(+)-Melezitose O-rhamnoside	Carbohydrates	27300	45400	30700	17200	16000	11400	1.21563	0.431335	-1.21312	down
pmb2654	Anthranilate O-hexosyl-O-hexoside	Organic acids and derivatives	1970000	1850000	2310000	5910000	8180000	3280000	1.17101	2.83361	1.50264	up
pmb2787	9-KODE	Lipids	182000	374000	822000	1430000	1560000	955000	1.07507	2.86284	1.51745	up
pmb2831	Protocatechuic acid O-glucoside	Polyphenol	842000	788000	756000	329000	381000	282000	1.32111	0.415759	-1.26618	down
pmb2848	3(2'-Chlorophenyl)-7-hydroxy-4-phenylcoumarin	Phenylpropanoids	11400	25000	29000	267000	244000	214000	1.31205	11.0856	3.47062	up
pmb2849	Camptothecin	Alkaloids	46400	35100	40700	9800	13600	13500	1.31538	0.301964	-1.72755	down
pmb2855	L-Glutamine O-hexside	Amino acid and derivatives	59300	34600	57000	117000	155000	121000	1.2498	2.60437	1.38094	up
pmb2954	Luteolin O-hexosyl-O-hexosyl-O-hexoside	Flavone	56000	64300	45800	9230	9	9	1.09499	0.0556773	-4.16677	down
pmb3000	Chrysoeriol O-acetylhexoside	Flavone	40800	32700	34900	8480	12500	13400	1.30102	0.317159	-1.65672	down
pmb3006	Apigenin 7-O-glucoside (Cosmosiin)	Flavone	174000	134000	116000	75500	67200	66800	1.27018	0.494104	-1.01711	down
pmb3023	Eriodictyol C-hexoside	Flavone	1360000	1590000	1350000	165000	208000	230000	1.33836	0.140233	-2.83411	down
pmb3044	Tricin di-O-hexoside	Flavone	141000	107000	116000	27700	24800	27500	1.33913	0.21978	-2.18587	down
pmb3056	Homovanilloyl quinic acid	Organic acids and derivatives	21700	17800	14400	9	9	9	1.34734	0.000500928	-10.9631	down
pmb3066	5-O-p-coumaroyl shikimic acid O-hexoside	Organic acids and derivatives	163000	141000	209000	47500	44000	78200	1.25776	0.330799	-1.59597	down
pmb3072	3-O-p-coumaroyl shikimic acid O-hexoside	Organic acids and derivatives	133000	105000	109000	36200	34700	45100	1.32162	0.334294	-1.58081	down
pmb3101	2-Isopropylmalate	Organic acids and derivatives	37100000	36100000	37700000	13900000	15200000	16600000	1.33767	0.412083	-1.27899	down
pmb3114	Epicatechin-epiafzelechin	Polyphenol	1650000	1230000	1250000	551000	482000	756000	1.25597	0.433172	-1.20699	down
pmb3121	LysoPE 18:1	Lipids	28700000	33600000	31700000	6600000	6310000	4210000	1.32861	0.182128	-2.45698	down
pmb3132	LysoPE 18:1 (2n isomer)	Lipids	33500000	36700000	35000000	7840000	7300000	5680000	1.33821	0.197909	-2.33709	down
pmc0960	LysoPC 20:4	Lipids	25800000	37000000	47500000	9190000	13800000	8760000	1.26346	0.287851	-1.7966	down
pmd0136	LysoPC 18:0	Lipids	3120000	5730000	42800000	302000000	238000000	102000000	1.17603	12.4298	3.63573	up
pmd0144	LysoPC 20:1 (2n isomer)	Lipids	1120000	1570000	2810000	9	9	222000	1.06264	0.0403669	-4.63068	down
pme0001	Hesperetin 7-O-neohesperidoside (Neohesperidin)	Flavanone	6340000	6070000	5040000	2640000	2490000	2120000	1.31833	0.415473	-1.26717	down
pme0005	Purine	Nucleotide and derivates	12900000	13500000	9670000	3640000	3220000	3730000	1.32476	0.293596	-1.7681	down
pme0013	L-Glutamic acid	Amino acid and derivatives	29100000	27600000	24800000	7620000	6270000	7880000	1.33657	0.267117	-1.90446	down
pme0026	L-(+)-Lysine	Amino acid and derivatives	18100000	20400000	21600000	11700000	8380000	9500000	1.2873	0.49218	-1.02274	down
pme0033	Hypoxanthine	Nucleotide and derivates	40500000	39500000	47700000	10700000	12300000	21000000	1.25417	0.344558	-1.53718	down
pme0056	2,3-dimethylsuccinic acid	Amino acid and derivatives	1050000	1160000	1070000	482000	549000	457000	1.33168	0.453659	-1.14032	down
pme0108	5-Methylcytosine	Nucleotide and derivates	1570000	1480000	1250000	644000	564000	426000	1.29838	0.38	-1.39593	down
pme0113	γ-Glu-Cys	Amino acid and derivatives	40100	47200	43400	111000	86600	225000	1.19412	3.23336	1.69303	up
pme0122	N6-Acetyl-L-lysine	Amino acid and derivatives	375000	465000	511000	956000	854000	1000000	1.3007	2.07994	1.05654	up
pme0128	D-Alanyl-D-Alanine	Amino acid and derivatives	8640	3920	9260	27900	27000	19000	1.21477	3.3868	1.75992	up
pme0197	Quercetin 3-O-rutinoside (Rutin)	Flavonol	5770000	5790000	5280000	2460000	1850000	2040000	1.32665	0.377078	-1.40706	down
pme0205	Catechin	Polyphenol	194000	181000	224000	95600	9	9	1.00745	0.159629	-2.6472	down
pme0226	L-Asparagine	Amino acid and derivatives	15300000	14900000	15300000	5710000	5550000	5750000	1.34724	0.373846	-1.41948	down
pme0230	Adenosine	Nucleotide and derivates	2190000	2640000	3080000	7140000	4580000	4300000	1.18328	2.02528	1.01812	up
pme0274	6-Aminocaproic acid	Organic acids and derivatives	20400000	21200000	22600000	47700000	43600000	41000000	1.33309	2.06075	1.04317	up
pme0279	2,6-Diaminooimelic acid	Amino acid and derivatives	468000	369000	438000	182000	197000	231000	1.30089	0.478431	-1.06362	down
pme0284	4-Guanidinobutyric acid	Organic acids and derivatives	51300	44400	44900	12100	16400	25200	1.23464	0.381935	-1.3886	down
pme0305	Ferulic acid	Phenylpropanoids	1780000	1520000	2070000	12100000	11100000	9410000	1.33614	6.07263	2.60232	up
pme0309	Methyl gallate	Organic acids and derivatives	388000	288000	283000	160000	68800	81900	1.22349	0.323983	-1.62601	down
pme0369	Kaempferol 3-O-rutinoside (Nicotiflorin)	Flavonol	4010000	3630000	3900000	1790000	1600000	1510000	1.33677	0.42461	-1.23579	down
pme0377	Naringenin	Flavanone	1310000	962000	752000	259000	266000	427000	1.25332	0.314815	-1.66742	down
pme0397	Shikimic acid	Organic acids and derivatives	949000	854000	668000	114000	117000	103000	1.34032	0.135168	-2.88718	down
pme0422	3-Hydroxy-4-methoxycinnamic acid	Phenylpropanoids	1770000	1560000	2120000	12900000	10800000	9690000	1.33516	6.12661	2.61509	up
pme0434	Procyanidin B2	Proanthocyanidins	1420000	1140000	1070000	639000	487000	647000	1.27198	0.48843	-1.03378	down
pme0460	L-Epicatechin	Polyphenol	31300000	26000000	26100000	13400000	9310000	18800000	1.16525	0.497722	-1.00659	down
pme0474	4-Hydroxybenzoic acid	Organic acids and derivatives	1980000	1040000	993000	463000	301000	432000	1.23486	0.298031	-1.74646	down
pme0500	D(+)-Melezitose	Carbohydrates	57100	49700	39500	127000	75100	133000	1.19359	2.2905	1.19566	up
pme0519	D-(+)-Sucrose	Carbohydrates	246000	215000	250000	1220000	1330000	1410000	1.3442	5.56962	2.47758	up
pme1002	L-Tyramine	Amino acid and derivatives	58300000	55600000	46300000	18900000	13800000	17400000	1.32146	0.312734	-1.67699	down
pme1086	Glutathione reduced form	Amino acid and derivatives	121000	127000	271000	940000	1390000	3280000	1.2582	10.8092	3.43419	up
pme1107	Guanine	Nucleotide and derivates	54900	46800	45100	22600	11700	28700	1.15109	0.429155	-1.22043	down
pme1292	Homogentisic acid	Organic acids and derivatives	124000	103000	152000	223000	225000	317000	1.22646	2.01847	1.01326	up
pme1294	Xanthosine	Nucleotide and derivates	1800000	1650000	1560000	645000	591000	669000	1.33913	0.38024	-1.39502	down
pme1310	N'-Formylkynurenine	Amino acid and derivatives	73800	66100	48200	9	9	9	1.34737	0.000143541	-12.7663	down
pme1322	Nα-Acetyl-L-arginine	Amino acid and derivatives	169000	189000	198000	692000	770000	589000	1.33448	3.68885	1.88317	up
pme1368	L-Pipecolic acid	Amino acid and derivatives	109000	141000	114000	43400	58300	68700	1.24598	0.468132	-1.09501	down
pme1398	Delphinidin 3-O-glucoside (Mirtillin)	Anthocyanins	6210000	11200000	8340000	1200000	514000	557000	1.30489	0.0881942	-3.50317	down
pme1408	L-Glutamine	Amino acid and derivatives	14100000	17500000	14600000	8120000	7010000	7800000	1.31238	0.49632	-1.01066	down
pme1434	Syringin	Phenylpropanoids	66900	42800	55200	9	9	9	1.34742	0.000163736	-12.5763	down
pme1478	Myricetin	Flavonol	38200	22600	39000	11500	14800	16100	1.21054	0.42485	-1.23498	down
pme1539	Isorhamnetin 3-O-neohesperidoside	Flavonol	397000	406000	445000	216000	195000	182000	1.3307	0.47516	-1.07351	down
pme1588	Isorhamnetin	Flavonol	9	9	9	9900	13400	5910	1.3441	1081.85	10.0793	up
pme1600	7-O-Methyleriodictyol	Flavanone	252000	260000	214000	23400	40000	28400	1.33098	0.126446	-2.9834	down
pme1605	Kaempferol 3-O-robinobioside (Biorobin)	Flavonol	3830000	2860000	3370000	1760000	1630000	1360000	1.29246	0.472167	-1.08263	down
pme1611	Isohemiphloin	Flavone	1700000	1400000	1450000	818000	604000	745000	1.29571	0.476264	-1.07017	down
pme1622	Kaempferol 3-O-glucoside (Astragalin)	Flavonol	465000	295000	225000	76800	66300	80200	1.29087	0.226701	-2.14114	down
pme1711	3-Hydroxy-3-methyl butyric acid	Organic acids and derivatives	2260000	2420000	2570000	8680000	9210000	7950000	1.34237	3.56414	1.83355	up
pme1730	D-Erythronolactone	Organic acids and derivatives	76000	54300	61800	162000	171000	215000	1.30772	2.85268	1.51232	up
pme1773	Cyanidin 3-O-rutinoside (Keracyanin)	Anthocyanins	2800000	1930000	2730000	1370000	853000	1470000	1.16412	0.49504	-1.01438	down
pme1824	Protocatechuic acid	Polyphenol	306000	208000	232000	117000	143000	108000	1.25256	0.493298	-1.01947	down
pme1846	D(+)-Glucose	Carbohydrates	581000	623000	731000	2720000	2810000	2660000	1.3419	4.23256	2.08153	up
pme2054	L-Tryptophan	Amino acid and derivatives	263000	268000	272000	1070000	1110000	640000	1.29228	3.51183	1.81222	up
pme2292	Putrescine	Phenolamides	221000	315000	363000	1000000	783000	814000	1.28938	2.88877	1.53045	up
pme2380	A-Ketoglutaric acid	Organic acids and derivatives	957000	849000	739000	176000	135000	200000	1.32828	0.200786	-2.31627	down
pme2427	N-Acetyl-L-tyrosine	Amino acid and derivatives	44100	46500	41400	12600	12600	17900	1.31603	0.326515	-1.61478	down
pme2457	Luteolin 7-O-glucoside (Cynaroside)	Flavone	636000	387000	357000	106000	102000	90100	1.31002	0.216014	-2.2108	down
pme2482	Protocatechuic aldehyde	Polyphenol	3930000	3240000	3250000	898000	648000	596000	1.3288	0.205566	-2.28232	down
pme2493	Kaempferol 3,7-dirhamnoside (Kaempferitrin)	Flavonol	247000	232000	196000	118000	109000	72500	1.25476	0.443704	-1.17233	down
pme2550	Cis-Aconitic acid	Organic acids and derivatives	347000	385000	354000	37800	28800	60800	1.31965	0.117311	-3.09159	down
pme2575	L-Carnosine	Amino acid and derivatives	19700	17000	21000	42000	37500	37100	1.31804	2.0208	1.01492	up
pme2761	4-Hydroxy-2-oxoglutaric acid	Organic acids and derivatives	76900	45800	80500	936000	761000	745000	1.33096	12.0177	3.58709	up
pme2827	Palmitaldehyde	Lipids	27700000	28900000	16200000	3730000	7570000	14700000	1.06844	0.357143	-1.48543	down
pme2898	Dihydromyricetin	Flavonol	2190000	1860000	1780000	557000	529000	743000	1.31816	0.313722	-1.67244	down
pme2949	Hesperetin 7-rutinoside (Hesperidin)	Flavanone	1060000	1070000	1060000	404000	461000	428000	1.34299	0.405329	-1.30283	down
pme2960	Naringenin chalcone	Flavanone	1250000	977000	736000	287000	263000	411000	1.2656	0.324333	-1.62445	down
pme2993	Scopoletin (7-Hydroxy-5-methoxycoumarin)	Phenylpropanoids	275000	181000	176000	102000	62600	65200	1.24608	0.363608	-1.45955	down
pme3013	3-Aminoisobutanoic acid	Amino acid and derivatives	1130	9	9	2280	4630	4270	1.07683	9.73868	3.28373	up
pme3081	4-(Aminomethyl)-5-(hydroxymethyl)-2-methylpyridin-3-ol	Alcohols	5010000	7150000	5290000	14200000	12300000	15300000	1.29673	2.39542	1.26028	up
pme3104	1-Methyladenine	Nucleotide and derivates	1400000	1400000	1600000	3790000	3190000	3550000	1.33252	2.39318	1.25893	up
pme3123	Sinapyl alcohol	Phenylpropanoids	42400	26800	32900	9	9	13000	1.0281	0.127502	-2.9714	down
pme3130	Quercetin 4'-O-glucoside (Spiraeoside)	Flavonol	4040000	3260000	3090000	1370000	662000	1110000	1.26244	0.302406	-1.72544	down
pme3179	CYS-GLY	Amino acid and derivatives	19500	25100	44700	110000	154000	320000	1.2396	6.53975	2.70924	up
pme3184	2'-Deoxyadenosine-5'-monophosphate	Nucleotide and derivates	568000	554000	536000	1330000	1020000	1110000	1.31586	2.08685	1.06133	up
pme3210	Genistein 7-O-Glucoside (Genistin)	Isoflavone	674000	275000	318000	245000	178000	179000	1.01661	0.475138	-1.07358	down
pme3256	Delphinidin 3-O-rutinoside (Tulipanin)	Anthocyanins	395000	260000	254000	21200	9	9	1.12568	0.0233421	-5.42092	down
pme3267	Kaempferol 3-O-galactoside (Trifolin)	Flavonol	414000	224000	160000	91200	57500	75200	1.20303	0.280576	-1.83353	down
pme3309	2-Methylglutaric acid	Organic acids and derivatives	1090000	1120000	1010000	463000	519000	481000	1.33906	0.454348	-1.13813	down
pme3346	5-hydroxyhexanoic acid	Organic acids and derivatives	3210000	2920000	3160000	1070000	1220000	1350000	1.3311	0.391819	-1.35174	down
pme3369	Rhamnetin (7-O-methxyl quercetin)	Flavonol	9	9	5550	22600	24500	7860	1.04814	9.87069	3.30315	up
pme3443	Sinapinaldehyde	Phenylpropanoids	201000	170000	167000	84100	73100	88100	1.32006	0.455948	-1.13306	down
pme3475	Butin	Flavone	1220000	931000	744000	253000	262000	438000	1.24818	0.329188	-1.60302	down
pme3970	β-Pseudouridine	Nucleotide and derivates	15800	52900	71700	107000	119000	102000	1.00373	2.33618	1.22415	up
pmf0017	DL-Homocysteine	Amino acid and derivatives	79200	50000	101000	291000	167000	110000	1.04409	2.46742	1.303	up
pmf0018	1-Aminocyclopropanecarboxylic acid	Amino acid and derivatives	3700000	3500000	3870000	1840000	1310000	2160000	1.2502	0.479675	-1.05987	down
pmf0027	Cyanidin 3-O-galactoside	Anthocyanins	12700000	15900000	14100000	2260000	1650000	2330000	1.33514	0.146136	-2.77462	down
pmf0032	Galactinol	Carbohydrates	1050000	1090000	1090000	7360000	5320000	5840000	1.33931	5.73375	2.51948	up
pmf0057	4,2',4',6'-Tetrahydroxychalcone	Flavone	333000	226000	179000	56800	55200	92100	1.25826	0.276558	-1.85434	down
pmf0058	4',5,7-Trihydroxyflavanone	Flavanone	316000	236000	190000	61500	59700	96800	1.27177	0.293801	-1.76709	down
pmf0068	Mannitol	Alcohols	92900	175000	157000	305000	305000	252000	1.18022	2.02871	1.02056	up
pmf0104	Caffeic acid	Phenylpropanoids	470000	414000	442000	205000	92000	171000	1.22942	0.352941	-1.5025	down
pmf0138	D-(+)-Mannose	Carbohydrates	879000	899000	1020000	5960000	8400000	6380000	1.3389	7.41244	2.88995	up
pmf0139	D-(+)-Galactose	Carbohydrates	982000	987000	1030000	5440000	5800000	4840000	1.3445	5.36179	2.42271	up
pmf0179	Narcissoside	Flavonoid	2750000	2050000	2070000	856000	1300000	1050000	1.25212	0.466667	-1.09954	down
pmf0208	Isoquercitroside	Flavonoid	3400000	2450000	3280000	1460000	1020000	1250000	1.28182	0.408543	-1.29144	down
pmf0230	Forchlorfenuron	Others	127000	14600	12500	9	9	9	1.32655	0.000175211	-12.4786	down
pmf0231	Chlorpyrifos	Alkaloids	28300	9700	20100	7950	8230	8990	1.02961	0.433219	-1.20683	down
pmf0263	Apigeninidin chloride	Anthocyanins	25200	31300	20400	9710	7550	12500	1.24929	0.386996	-1.36961	down
pmf0268	Indole-3-carboxylic	Alkaloids	82400	89500	72800	28900	48900	32400	1.2453	0.450347	-1.15089	down
pmf0282	Melibiose	Carbohydrates	130000	170000	94000	840000	485000	629000	1.29421	4.95939	2.31016	up
pmf0295	Skimmin	Phenylpropanoids	1190000	1630000	1270000	390000	393000	525000	1.30822	0.319804	-1.64474	down
pmf0345	(-)-Epiafzelechin	Polyphenol	33000000	22500000	24700000	9060000	6650000	14000000	1.21537	0.370449	-1.43265	down
pmf0360	Astilbin	Flavonoid	754000	669000	604000	246000	256000	269000	1.33459	0.380365	-1.39454	down
pmf0375	Isorhamnetin 3-O-glucoside	Flavonoid	332000	317000	380000	133000	124000	147000	1.33058	0.392614	-1.34882	down
pmf0403	L-Hyoscyamine	Alkaloids	183000	178000	121000	83300	62900	64300	1.25614	0.436722	-1.19521	down
pmf0441	N-Acetyl-L-phenylalanine	Amino acid and derivatives	3790000	3400000	3140000	1370000	1330000	1260000	1.33852	0.383349	-1.38327	down
pmf0446	Gentiopicroside	Terpene	21400	30700	21000	38600	59800	50700	1.20805	2.03967	1.02834	up
pmf0485	Panose	Carbohydrates	44300	40100	58500	116000	103000	99600	1.29046	2.22953	1.15674	up
pmf0506	Ligustilide	Others	284000	179000	211000	48700	91300	132000	1.12213	0.403561	-1.30914	down
pmf0514	alpha-Cyperone	Others	185000	254000	182000	36200	71000	83500	1.22518	0.307085	-1.70329	down
pmf0527	Osthole	Phenylpropanoids	197000	230000	164000	56700	54700	60300	1.32918	0.290525	-1.78327	down
pmf0559	Abrine	Alkaloids	25300	44600	43200	108000	96300	135000	1.26644	3	1.58496	up
pmf0589	Glutamic acid	Amino acid and derivatives	33100000	29800000	27800000	8340000	6650000	8850000	1.33267	0.262845	-1.92772	down
