# Supplementary material for: Nutritional component changes in Xiangfen 1 banana at different developmental stages
Source: Royal Society of Chemistry journal article supplement (doi:10.1039/d0fo00999g), 2020-01-01
Supplement: d0fo00999g4.pdf [file d0fo00999g4.pdf]

Table S1. Qualitative and quantitative analyses of metabolites in Xiangfen1 banana fruit

Table S2. Differential metabolites between mature green fruit and mature fruit

Table S3. Differential metabolites between young fruit and mature fruit

Table S4. Differential metabolites between young fruit and mature green fruit
