# Supplementary material for: Nutritional component changes in Xiangfen 1 banana at different developmental stages
Source: Royal Society of Chemistry journal article supplement (doi:10.1039/d0fo00999g), 2020-01-01
Supplement: d0fo00999g5.xlsx [file d0fo00999g5.xlsx]

## Sheet: Sheet1
Index	Q1 (Da)	Q3 (Da)	Rt (min)	Molecular Weight (Da)	Ionization model	KEGG ID	Compounds	Class	mix01	mix02	mix03	maturefruit1	maturefruit2	maturefruit3	maturegreenfruit1	maturegreenfruit2	maturegreenfruit3	youngfruit1	youngfruit2	youngfruit3
pma0104	369.1	207.1	3.82	368.12	[M+H]+	-	N-sinapoyl hydroxycoumarin	Phenylpropanoids	117000	61300	83800	137000	47900	63900	112000	89500	79500	92600	68400	117000
pma0134	121	93.1	1.16	120.04	[M+H]+	-	D(-)-Threose	Carbohydrates	8950000	8660000	8660000	4350000	3380000	3270000	5710000	4770000	5380000	18100000	19000000	16700000
pma0149	341.1	207.1	2.28	340.08	[M+H]+	C02887	Sinapoyl malate	Organic acids and derivatives	164000	176000	133000	170000	133000	188000	171000	144000	180000	71000	47400	9
pma0294	463.1	301	4.04	462.12	[M+H]+	-	Chrysoeriol 5-O-hexoside	Flavone	82500	84700	110000	245000	174000	188000	9	9	9	9	9	9
pma0461	277.2	93.1	8.52	276.22	[M+H]+	-	"14,15-Dehydrocrepenynic acid"	Lipids	35300000	34000000	33900000	7390000	7180000	4770000	62100000	61800000	38900000	13500000	23200000	49300000
pma0948	138.1	121.1	1.26	137.09	[M+H]+	-	Hydroxyphenethylamine	Others	12900000	14200000	16000000	6500000	6080000	5660000	11300000	8330000	9510000	34800000	30500000	30000000
pma2088	627.1	465	4.83	626.1	[M+H]+	-	"Quercetin-3,4'-O-di-beta-glucopyranoside"	Flavonol	82200	72500	87100	149000	98400	192000	9	9	9	9	9	9
pma2987	142.1	83.1	0.62	141.1	[M+H]+	C00860	Histidinol	Alcohols	224000000	225000000	185000000	160000000	173000000	133000000	179000000	147000000	161000000	118000000	154000000	172000000
pma3101	256.2	124.1	0.84	255.2	[M+H]+	C05841	Nicotinate ribonucleoside	Vitamins and derivatives	1350000	1240000	841000	2010000	1360000	1540000	831000	836000	803000	487000	572000	625000
pma3606	295.2	179.2	9.22	294.2	[M+H]+	-	"9-Hydroxy-(10E,12Z,15Z)-octadecatrienoic acid"	Lipids	23100000	24200000	25900000	4740000	4400000	3270000	41500000	51300000	21600000	10200000	20400000	48300000
pma3649	132.1	86.1	1.01	131.1	[M+H]+	C00430	5-Aminolevulinate	Organic acids and derivatives	19700000	21700000	14000000	30300000	18400000	10400000	21500000	14600000	16700000	9120000	7580000	10000000
pma6270	258.2	104.2	0.78	258.2	Protonated	C00670	sn-Glycero-3-phosphocholine	Alkaloids	3100000	4160000	3150000	1110000	854000	1020000	4580000	5240000	1710000	2230000	3260000	6500000
pma6281	145.1	101.1	0.75	146.06	[M-H]-	-	Methylglutaric acid	Organic acids and derivatives	67900	74300	101000	12600	24800	24000	82000	63600	88600	157000	162000	151000
pma6298	96	68.1	1.16	95.04	[M+H]+	-	3-Hydroxypyridine	Others	35800	27700	43400	24600	32400	37300	38500	38900	36800	39700	25200	50900
pma6353	417.2	297.1	4	416.2	[M+H]+	-	Chrysin C-hexoside	Flavone	73600	34300	36200	103000	32800	44200	32500	37400	42100	73000	76800	78100
pma6389	345.2	177.2	6.33	344.2	[M+H]+	C04444	Ayanin	Flavonol	13300	20300	11400	4580	9	10500	10200	11400	20000	19000	20400	21200
pma6455	229	97	0.86	230.02	[M-H]-	C00117	Ribulose-5-phosphate	Carbohydrates	101000	107000	134000	105000	136000	156000	67900	69000	97200	215000	119000	211000
pma6460	337	163.1	3.26	338	[M-H]-	-	5-O-p-Coumaroylquinic acid	Organic acids and derivatives	10700	10400	9560	9	9	9	13400	9	18100	14300	18100	17200
pma6499	509.3	347.1	3.41	508.3	[M+H]+	-	Limocitrin O-hexoside	Flavone	2590000	2120000	1910000	569000	726000	187000	638000	810000	1080000	4980000	5100000	4870000
pma6561	341	135	2.86	342	[M-H]-	-	Caffeic acid O-glucoside	Phenylpropanoids	1530000	1480000	1540000	1440000	1450000	1690000	965000	828000	994000	1720000	1640000	1560000
pma6576	347	153.2	4.41	346	[M+H]+	-	Spinacetin	Flavone	743000	773000	915000	445000	534000	545000	548000	426000	514000	1550000	995000	1140000
pma6599	207.1	85	3.31	206.1	[M+H]+	-	6-Hydroxymethylherniarin	Phenylpropanoids	105000	84800	89000	64900	69000	41100	62900	62400	97100	132000	169000	79500
pma6639	479.2	317.2	4.17	478.2	[M+H]+	-	Isorhamnetin O-hexoside	Flavonol	158000	134000	182000	347000	373000	227000	72500	93300	130000	176000	141000	87900
pmb0064	374.1	198.2	2.05	373.1	[M+H]+	C04831	DIMBOA glucoside	Others	948000	1000000	913000	1110000	1020000	877000	616000	476000	533000	776000	891000	854000
pmb0069	122	105	2.26	121	[M+H]+	C09815	Benzamide	Others	1070000	983000	1170000	420000	432000	457000	1470000	1400000	1500000	624000	360000	968000
pmb0115	225.1	121	3.71	224.1	[M+H]+	C02794	3-Hydroxykynurenine	Amino acid and derivatives	85000	56500	92400	79800	102000	63600	38100	48400	105000	44100	63800	46400
pmb0130	203	144	4.72	202	[M+H]+	-	N-Acetyl tryptamine	Phenolamides	35800	31200	30500	80200	63100	86800	9	9	9	9	9	9
pmb0149	351	147.1	6.73	350	[M+H]+	-	MAG (18:4) isomer1	Lipids	24900	22800	40500	28100	29300	27200	61400	47800	55300	9	31000	61300
pmb0164	355.1	147.2	8.46	354.1	[M+H]+	-	MAG (18:2) isomer1	Lipids	1110000	1470000	1280000	714000	699000	539000	553000	530000	653000	2150000	1780000	2360000
pmb0197	298.1	166.3	1.16	297.1	[M+H]+	-	N2-methylguanosine	Nucleotide and derivates	2030000	2030000	1870000	5550000	4170000	3540000	706000	485000	575000	197000	251000	230000
pmb0247	137.3	94.2	3.14	136.3	[M+H]+	C00568	p-Aminobenzoate	Organic acids and derivatives	2290000	2560000	2320000	3610000	4770000	6750000	194000	68400	131000	431000	567000	241000
pmb0277	331.1	315	5.74	330.1	[M+H]+	-	Tricin	Flavone	135000	121000	128000	86900	86100	69100	49900	40800	52300	169000	174000	218000
pmb0292	387.1	331.1	7.65	386.1	[M+H]+	C00187	Cholesterol	Lipids	916000	915000	873000	532000	881000	462000	1290000	675000	944000	614000	595000	1150000
pmb0296	357.2	265.4	8.97	356.2	[M+H]+	-	MAG (18:1) isomer2	Lipids	2380000	3520000	2840000	975000	422000	1020000	676000	970000	1160000	8450000	13400000	6680000
pmb0312	176.1	91.2	3.7	175.1	[M+H]+	-	5-methoxyindole-3-carbaldehyde	Indole derivatives	68800	80200	67200	21100	37200	26900	59100	41700	68600	113000	120000	86500
pmb0325	321.1	177.2	2.87	320.1	[M+H]+	-	N-Feruloyl spermidine	Phenolamides	219000	209000	277000	231000	158000	235000	258000	211000	223000	73100	191000	128000
pmb0374	136.1	118.9	1.82	135.1	[M+H]+	-	Aminopurine	Others	1560000	1610000	1720000	3170000	2420000	2170000	1370000	9	890000	437000	556000	509000
pmb0382	339.1	177.2	3.88	338.1	[M+H]+	-	O-Feruloyl 4-hydroxylcoumarin	Phenylpropanoids	3010000	2850000	3000000	3970000	4290000	4900000	1970000	1290000	1940000	2150000	2000000	1920000
pmb0423	195.1	145.3	3.22	194.1	[M+H]+	-	Hydroxy-methoxycinnamate	Phenylpropanoids	6000000	6400000	6400000	2680000	2160000	5230000	8970000	7800000	8940000	4890000	3420000	4090000
pmb0449	162.1	97.9	0.8	161.1	[M+H]+	C00956	2-Aminoadipic acid (L-Homoglutamic acid)	Amino acid and derivatives	260000	223000	226000	189000	118000	78500	359000	205000	217000	301000	490000	451000
pmb0464	458.1	116.3	0.81	457.1	[M+H]+	-	Aspartic acid di-O-glucoside	Amino acid and derivatives	3320000	2190000	1920000	2800000	3700000	2850000	912000	1160000	937000	323000	1000000	929000
pmb0468	178	161	1.65	177	[M+H]+	C03145	N-formylmethionine	Amino acid and derivatives	66100000	68800000	58600000	50600000	48600000	48200000	49600000	38300000	43500000	78900000	76400000	79600000
pmb0484	104.1	60.1	0.76	103.1	[M+H]+	C00114	Choline	Alkaloids	144000000	146000000	157000000	72800000	43600000	56700000	181000000	180000000	147000000	146000000	178000000	178000000
pmb0488	146.2	72.2	0.56	145.2	[M+H]+	C00315	Spermidine	Phenolamides	406000	449000	477000	321000	649000	450000	464000	755000	469000	589000	354000	470000
pmb0490	235.1	146.8	2.29	234.1	[M+H]+	C18326	N-p-Coumaroyl putrescine	Phenolamides	912000	917000	836000	1620000	1780000	863000	521000	406000	417000	54200	84900	124000
pmb0492	584.2	325	2.42	583.2	[M+H]+	-	"N',N"",N""'-p-coumaroyl-cinnamoyl-caffeoyl spermidine"	Phenolamides	106000	108000	105000	54000	56900	68400	104000	87300	81500	67100	95800	128000
pmb0494	295	206.9	2.77	294	[M+H]+	-	N-Sinapoyl putrescine	Phenolamides	222000	168000	142000	276000	143000	210000	57400	35500	9	9	9	37300
pmb0496	307.2	177.2	2.78	306.2	[M+H]+	C18325	N-Feruloyl agmatine	Phenolamides	562000	499000	476000	345000	232000	566000	388000	303000	500000	556000	506000	571000
pmb0501	131.1	114.1	0.75	130.1	[M+H]+	C00179	Agmatine	Phenolamides	158000	140000	116000	115000	155000	150000	122000	269000	149000	115000	109000	111000
pmb0505	235.1	147.2	2.38	234.1	[M+H]+	-	N'-p-Coumaroyl putrescine	Phenolamides	1130000	1150000	1170000	2440000	2210000	1150000	623000	566000	793000	65400	93200	199000
pmb0514	348.1	136.1	0.85	347.1	[M+H]+	C01367	Adenosine 3'-monophosphate	Nucleotide and derivates	3820000	3690000	3800000	4820000	3190000	3090000	5300000	3190000	3440000	2650000	2940000	2690000
pmb0530	664.2	136.2	1.16	663.2	[M+H]+	C00003	Nicotinic acid adenine dinucleotide	Nucleotide and derivates	374000	608000	796000	701000	16900	329000	1280000	1220000	691000	2320000	1620000	1770000
pmb0550	449.1	287.3	2.59	449.1	Protonated	C08604	Cyanidin 3-O-glucoside (Kuromanin)	Anthocyanins	8020000	8600000	7020000	2230000	1550000	2070000	2540000	1790000	2050000	17100000	16500000	13700000
pmb0563	301.1	286	3.95	301.1	Protonated	C08726	Peonidin	Anthocyanins	46600	22300	39200	10300	12400	10700	17900	13100	21900	95200	53900	30900
pmb0565	509.1	347.2	3.41	508.1	[M+H]+	-	Syringetin 3-O-hexoside	Flavonol	2440000	2510000	2260000	1200000	979000	658000	475000	817000	911000	5980000	5210000	4360000
pmb0569	509.2	347.1	4.17	508.2	[M+H]+	-	Syringetin 5-O-hexoside	Flavone	214000	151000	130000	158000	203000	71700	151000	63800	110000	229000	375000	244000
pmb0571	565.1	271.6	4.03	564.1	[M+H]+	-	Apigenin O-hexosyl-O-pentoside	Flavone	4740	3850	7780	9	9	6740	9	9	9	9	9	8610
pmb0576	519	271	4.23	518	[M+H]+	-	Apigenin O-malonylhexoside	Flavone	349000	287000	336000	219000	286000	259000	248000	244000	170000	2180000	342000	466000
pmb0588	611.1	449.3	3.32	610.1	[M+H]+	-	"Luteolin 3',7-di-O-glucoside"	Flavone	35300	34300	63800	22600	9	9	43700	68000	90000	9	35100	34400
pmb0595	479.2	317.2	4.17	478.2	[M+H]+	-	Isorhamnetin 5-O-hexoside	Flavonol	207000	158000	94700	9	9	9	134000	9	126000	214000	164000	250000
pmb0602	509.3	347.2	4.17	508.3	[M+H]+	-	Syringetin 7-O-hexoside	Flavone	380000	349000	546000	324000	520000	124000	204000	181000	234000	963000	614000	609000
pmb0607	463.2	301.1	4.3	462.2	[M+H]+	-	Chrysoeriol 7-O-hexoside	Flavone	142000	163000	141000	286000	201000	127000	9	9	9	9	9	9
pmb0615	789.1	626.8	2.58	788.1	[M+H]+	-	Hesperetin C-hexosyl-O-hexosyl-O-hexoside	Flavone	51500	78100	111000	9	26700	9	9	14500	9	109000	96500	133000
pmb0618	627.1	465.1	2.78	626.1	[M+H]+	-	8-C-hexosyl-hesperetin O-hexoside	Flavone	241000	299000	168000	9	88300	83200	76400	9	94900	641000	674000	549000
pmb0620	787.1	625.1	2.77	786.1	[M+H]+	-	Chrysoeriol 6-C-hexoside 8-C-hexoside-O-hexoside	Flavone	201000	188000	132000	41600	9	9	227000	137000	307000	182000	230000	252000
pmb0628	613.1	451.1	3.09	612.1	[M+H]+	-	Eriodictiol C-hexosyl-O-hexoside	Flavone	238000	145000	167000	109000	9	136000	276000	90300	337000	161000	133000	185000
pmb0673	403.1	367.1	4.3	402.1	[M+H]+	-	Apigenin 6-C-pentoside	Flavone	101000	121000	86200	9	100000	9	9	104000	141000	109000	164000	142000
pmb0679	755.1	417.4	3.94	754.1	[M+H]+	-	C-rhamnosyl-apigenin O-feruloylhexoside	Flavone	29800	29200	44900	9	6560	9	3860	9	15400	39800	18600	18300
pmb0686	537	289	4.41	536	[M+H]+	-	Eriodictyol O-malonylhexoside	Flavanone	117000	108000	110000	45700	49300	34300	9	49000	9	9	10600	4060
pmb0711	611.2	303.1	3.7	610.2	[M+H]+	-	Quercetin 7-O-rutinoside	Flavonol	2560000	1410000	1550000	1930000	679000	1560000	1750000	3160000	1110000	4130000	2990000	2450000
pmb0712	655.2	331.1	3.5	654.2	[M+H]+	-	Tricin 5-O-hexosyl-O-hexoside	Flavone	90100	35700	65500	50100	27200	45200	54100	39900	79800	131000	124000	111000
pmb0713	655.2	331.2	3.37	654.2	[M+H]+	-	Tricin 7-O-hexosyl-O-hexoside	Flavone	81800	112000	155000	57800	47700	28500	94200	68900	83800	242000	184000	237000
pmb0724	477.1	331.1	4.99	476.1	[M+H]+	-	Tricin O-rhamnoside	Flavone	65100	73600	68400	53200	49400	9	58700	9	57600	117000	138000	131000
pmb0736	493.1	331	4.3	492.1	[M+H]+	-	Tricin 7-O-hexoside	Flavone	4740000	4210000	4710000	2960000	2660000	2570000	3150000	2580000	3130000	7570000	6330000	6150000
pmb0766	390.4	328.3	7.2	389.4	[M+H]+	-	Azoxystrobin acid	Organic acids and derivatives	2220000	1590000	1370000	6180	9	9	7790	8410	8120	5750	9	9
pmb0767	302.4	60.2	7.25	301.4	[M+H]+	-	D-erythro-Dihydrosphingosine	Alcohols	32300	26300	40100	54800	83600	65000	47600	44600	24600	31600	32000	45300
pmb0769	485.1	323.1	3.79	484.1	[M+H]+	-	N-hexosyl-p-coumaroyl serotonin	Alkaloids	351000	218000	255000	380000	319000	378000	237000	380000	342000	96900	117000	127000
pmb0774	177.2	160.3	1.63	176.2	[M+H]+	C17203	N-hydroxy tryptamine	Alkaloids	49000000	45000000	48800000	43500000	37900000	40500000	41200000	27900000	35100000	55600000	59100000	52900000
pmb0776	337.1	177.4	2.79	336.1	[M+H]+	-	N-Feruloyl tryptamine	Alkaloids	153000	154000	123000	218000	169000	137000	160000	146000	163000	9	19600	25800
pmb0782	86.1	69.2	1.19	85.1	[M+H]+	C01746	Piperidine	Alkaloids	9540000	11400000	10200000	14800000	9030000	9790000	9110000	8320000	7620000	4060000	3870000	4760000
pmb0785	130.1	103.3	4.71	129.1	[M+H]+	C06323	Isoquinoline	Alkaloids	60000	60500	59000	9	9	9	104000	102000	97500	100000	80700	104000
pmb0789	332.1	314.3	1.16	331.1	[M+H]+	-	Pyridoxine O-glucoside	Vitamins and derivatives	13800000	13800000	12900000	9440000	8480000	11800000	18100000	14500000	17700000	6410000	7480000	7760000
pmb0800	123.1	79.9	1.52	122.1	[M+H]+	C00153	Niacinamide	Vitamins and derivatives	9310000	8110000	8860000	2220000	2250000	2590000	9880000	7320000	8760000	13400000	12600000	15300000
pmb0801	346	184.1	1.58	345	[M+H]+	-	4-Pyridoxic acid O-hexoside	Vitamins and derivatives	3770000	3620000	3880000	4080000	3690000	3240000	4090000	2240000	3630000	2690000	2880000	2680000
pmb0802	220.2	202.1	2.15	219.2	[M+H]+	C00864	D-Pantothenic acid	Vitamins and derivatives	3780000	3330000	3290000	2500000	2490000	2640000	4040000	9	3420000	1690000	2160000	1970000
pmb0818	206.1	147.5	2.39	205.1	[M+H]+	C05660	Methoxyindoleacetic acid	Indole derivatives	7930000	6800000	6780000	11500000	8910000	9800000	6100000	6240000	3830000	1090000	1320000	1590000
pmb0819	157	130	2.39	156	[M+H]+	C02938	3-Indoleacetonitrile	Indole derivatives	228000	238000	255000	547000	478000	696000	118000	373000	81500	102000	35700	42500
pmb0824	537.1	177.4	2.68	536.1	[M+H]+	-	Syringic acid O-feruloyl-O-hexoside	Organic acids and derivatives	43100	67300	42400	77900	30200	56600	9	9	9	9	9	9
pmb0829	98.9	80.9	0.88	97.9	[M+H]+	C00009	Phosphoric acid	Organic acids and derivatives	2220000	2250000	2350000	1720000	1340000	980000	2880000	2110000	3250000	15200000	7020000	9740000
pmb0835	611.2	287.1	2.36	610.2	[M+H]+	-	Gallocatechin-gallocatechin	Polyphenol	562000	577000	558000	317000	314000	507000	571000	391000	539000	509000	431000	711000
pmb0837	577.1	425.3	2.92	576.1	[M+H]+	-	Procyanidin A3	Proanthocyanidins	75800	97000	78100	21100	9	49900	69400	47200	94500	63600	77400	85300
pmb0848	494.3	184.2	7.88	493.3	[M+H]+	-	LysoPC 16:1 (2n isomer)	Lipids	4380000	4520000	4190000	882000	612000	798000	7440000	7210000	5480000	4240000	6000000	9700000
pmb0852	520.3	502.2	8.43	519.3	[M+H]+	-	LysoPC 18:2	Lipids	4480000	4730000	4970000	3130000	2030000	2320000	4800000	5030000	4250000	5240000	7200000	8950000
pmb0854	518.3	459.3	8.79	517.3	[M+H]+	-	LysoPC 18:3	Lipids	4890000	4410000	5420000	2500000	1490000	1420000	18100000	11600000	3920000	2350000	3730000	20300000
pmb0855	496.3	184.2	8.8	495.3	[M+H]+	-	LysoPC 16:0	Lipids	19400000	20800000	18200000	11300000	5470000	6150000	76500000	57800000	19800000	12400000	21600000	106000000
pmb0863	492.3	184	7.34	491.3	[M+H]+	-	LysoPC 16:2 (2n isomer)	Lipids	1390000	1300000	1160000	889000	657000	772000	4860000	3910000	2380000	392000	733000	1030000
pmb0865	518.2	184.1	7.71	517.2	[M+H]+	-	LysoPC 18:3 (2n isomer)	Lipids	2230000	2250000	1700000	3490000	2580000	1810000	2800000	2320000	1880000	3060000	4410000	5020000
pmb0866	468.1	184.4	7.74	467.1	[M+H]+	-	LysoPC 14:0	Lipids	1590000	1390000	1320000	1730000	1060000	894000	2250000	1920000	1020000	657000	1040000	2080000
pmb0873	520	184.5	8.25	519	[M+H]+	-	LysoPC 18:2 (2n isomer)	Lipids	2250000	2460000	2220000	1590000	1130000	1060000	2610000	2540000	2100000	2040000	3870000	4740000
pmb0874	478.6	460.6	8.38	477.6	[M+H]+	-	LysoPE 18:2 (2n isomer)	Lipids	15600000	18200000	18800000	9030000	8000000	8230000	12700000	16000000	12300000	25000000	29700000	25300000
pmb0880	482.1	313.8	8.98	481.1	[M+H]+	-	LysoPE 18:0 (2n isomer)	Lipids	23600	25600	29000	8700	10900	9	148000	99300	64300	8190	14500	119000
pmb0882	522.1	504.2	9.07	521.1	[M+H]+	-	LysoPC 18:1	Lipids	10000000	9790000	9440000	2800000	1690000	2660000	4460000	5410000	6870000	15100000	21400000	24700000
pmb0889	279.3	95.1	8.96	278.3	[M+H]+	C08364	Punicic acid	Lipids	14700000	14800000	14200000	1270000	1440000	1340000	18200000	19300000	10200000	6510000	12000000	31300000
pmb0890	355.1	263.3	10.52	354.1	[M+H]+	-	MAG (18:2)	Lipids	285000	431000	454000	330000	264000	393000	475000	223000	285000	928000	755000	549000
pmb0896	265.1	177.5	2.33	264.1	[M+H]+	-	N'-Feruloyl putrescine	Phenolamides	3590000	4300000	3130000	4540000	3940000	4540000	3280000	1870000	2550000	323000	499000	438000
pmb0964	366.2	204.1	0.8	365.2	[M+H]+	-	iP7G	Nucleotide and derivates	1200000	1020000	1400000	9	9	9	374000	228000	367000	144000	186000	187000
pmb0981	348.2	136	1.16	347.2	[M+H]+	C00020	Adenosine 5'-monophosphate	Nucleotide and derivates	3460000	3620000	3290000	4200000	2840000	2780000	4740000	2480000	2830000	2210000	2140000	2540000
pmb0998	364.1	152.1	1.01	363.1	[M+H]+	C00144	Guanosine 5'-monophosphate	Nucleotide and derivates	240000	291000	254000	187000	126000	143000	829000	433000	310000	244000	218000	236000
pmb1096	118	91	2.39	117	[M+H]+	C00463	Indole	Indole derivatives	7930000	8530000	8230000	12400000	10200000	8220000	6750000	6880000	4240000	1420000	1470000	1800000
pmb1178	339.1	145.4	3.32	338.1	[M+H]+	-	O-Feruloyl 2-hydroxylcoumarin	Phenylpropanoids	729000	765000	805000	1440000	1160000	1570000	233000	271000	160000	72700	116000	140000
pmb1240	503.2	311.1	3.79	502.2	[M+H]+	-	Phellodensin F	Others	559000	670000	556000	1490000	1510000	1220000	9	9	9	9	9	9
pmb1318	457.2	209.2	4.48	456.2	[M+H]+	-	8-Methyl-2-oxo-4-phenyl-2H-chromen-7-yl 4-(hexyloxy)benzoate	Organic acids and derivatives	1570000	1410000	1470000	1520000	2010000	2150000	1670000	1550000	1080000	730000	671000	607000
pmb1452	275.1	213.2	6.23	274.1	[M+H]+	-	N-Lauryldiethanolamine	Others	321000	318000	335000	9	9	9	9	9	9	163000	275000	9
pmb1530	317.1	137.1	7.34	316.1	[M+H]+	-	Phytocassane D	Terpene	12300	14700	9800	9	9	9	18900	24300	16200	7010	16100	18500
pmb1574	277.2	93	8.21	276.2	[M+H]+	-	Octadecadien-6-ynoic acid	Lipids	1150000	1220000	1210000	160000	197000	150000	1200000	1880000	364000	545000	991000	1640000
pmb1587	207.2	165.2	8.41	206.2	[M+H]+	-	"4-Hydroxy-3,5-diisopropylbenzaldehyde"	Organic acids and derivatives	165000	219000	267000	55400	56100	64000	73300	59800	71300	93500	72000	73100
pmb1650	279.2	149.4	9.71	278.2	[M+H]+	-	"Octadeca-11E,13E,15Z-trienoic acid"	Lipids	21500000	20400000	21900000	15900000	22000000	22000000	16200000	22300000	20800000	28500000	23300000	28200000
pmb1656	353.1	335.1	9.9	352.1	[M+H]+	-	MAG (18:3) isomer4	Lipids	297000	323000	359000	389000	243000	354000	204000	209000	233000	400000	455000	274000
pmb1754	184	125	0.78	183	[M+H]+	C00588	O-Phosphocholine	Alkaloids	3910000	3160000	3390000	3970000	3630000	4660000	3940000	2840000	3780000	3300000	3440000	5120000
pmb1912	474.2	327	2.3	473.2	[M+H]+	C00234	10-Formyl-THF	Organic acids and derivatives	4290000	3990000	3850000	3430000	2860000	3170000	6610000	5310000	5080000	3080000	3040000	3250000
pmb2211	343.1	240.7	6.59	342.1	[M+H]+	-	Cocamidopropyl betaine	Alkaloids	2920000	2840000	2820000	2240000	3210000	2330000	3000000	2680000	3140000	3280000	2680000	3070000
pmb2222	319.1	283.7	7.07	318.1	[M+H]+	-	Phytocassane C	Terpene	4360000	4480000	4410000	12600000	15300000	14000000	5170000	3890000	2210000	1560000	2120000	2230000
pmb2228	538.1	184.4	6.84	537.1	[M+H]+	-	LysoPC 19:0	Lipids	181000	144000	149000	54900	50500	31300	311000	283000	193000	143000	158000	300000
pmb2260	480.1	184.5	7.76	479.1	[M+H]+	-	LysoPC 15:1	Lipids	1450000	1360000	1040000	208000	161000	148000	2810000	2260000	1290000	1440000	2500000	4740000
pmb2319	482.3	184.1	8.26	481.3	[M+H]+	-	LysoPC 15:0	Lipids	10600000	10000000	9680000	1700000	1150000	1110000	32000000	22900000	7850000	6590000	11300000	31300000
pmb2325	353.1	261.8	8.42	352.1	[M+H]+	-	MAG (18:3) isomer2	Lipids	8310000	7520000	6490000	5960000	6550000	6070000	3130000	2980000	6170000	23900000	18200000	5430000
pmb2363	357.2	265.3	8.76	356.2	[M+H]+	-	MAG (18:1) isomer1	Lipids	2590000	3580000	2560000	647000	660000	639000	789000	545000	1020000	8950000	10700000	4640000
pmb2369	772.1	496.2	8.79	771.1	[M+H]+	-	PC 19:2/16:0	Lipids	18400	19200	23900	40700	42700	12300	117000	135000	40300	9	9	21000
pmb2388	524.1	184	8.91	523.1	[M+H]+	-	LysoPC 18:0 (2n isomer)	Lipids	2300000	2030000	2100000	890000	358000	546000	1690000	1750000	1340000	3910000	4130000	6280000
pmb2406	510.1	184.4	9.34	509.1	[M+H]+	-	LysoPC 17:0	Lipids	8830000	8180000	7790000	15500000	18100000	8470000	54600000	40200000	19600000	920000	1690000	14100000
pmb2444	353.2	261.3	10.06	352.2	[M+H]+	-	MAG (18:3) isomer1	Lipids	29500000	32000000	30400000	34600000	26800000	32400000	22700000	18800000	22100000	40600000	39400000	26400000
pmb2507	213.1	97	0.92	214.1	[M-H]-	C00672	2-Deoxyribose 1-phosphate	Others	24800	32500	14500	9	26500	16900	29100	39500	43400	142000	87400	76600
pmb2556	345.1	167.1	2.27	346.1	[M-H]-	-	Syringaldehyde O-glucoside	Organic acids and derivatives	103000	103000	112000	190000	280000	270000	9	20200	9	14300	15700	14600
pmb2561	190.1	84	2.37	191.1	[M-H]-	C02712	N-Acetylmethionine	Amino acid and derivatives	135000	127000	125000	54900	58400	48300	74000	68600	74000	231000	232000	204000
pmb2591	245	203.2	3.87	246	[M-H]-	C03137	Acetyl tryptophan	Amino acid and derivatives	530000	493000	534000	371000	376000	306000	376000	357000	388000	925000	926000	798000
pmb2620	207.1	133.1	5.52	208.1	[M-H]-	-	"3,4-Dimethoxycinnamic acid"	Phenylpropanoids	24900	14600	15100	9	9	9	58600	62900	24000	3250	11100	31800
pmb2653	649.1	145	0.76	650.1	[M-H]-	-	D(+)-Melezitose O-rhamnoside	Carbohydrates	108000	103000	131000	46800	50000	49100	17200	16000	11400	27300	45400	30700
pmb2654	460.1	117.9	0.78	461.1	[M-H]-	-	Anthranilate O-hexosyl-O-hexoside	Organic acids and derivatives	6870000	9490000	7290000	5810000	5350000	5370000	5910000	8180000	3280000	1970000	1850000	2310000
pmb2657	289.1	97.1	0.71	290.1	[M-H]-	C03406	Argininosuccinate	Organic acids and derivatives	407000	385000	413000	237000	290000	461000	473000	380000	459000	458000	513000	398000
pmb2778	295	277.3	8.96	296	[M-H]-	-	"9,10-EODE"	Lipids	480000	516000	512000	52100	39800	22400	526000	695000	431000	247000	520000	1730000
pmb2786	293	275	8.42	294	[M-H]-	-	9-HOTrE	Lipids	22400	29200	26800	6530	8970	6430	60400	51100	35300	22500	29500	67800
pmb2787	293.2	275.1	9.19	294.2	[M-H]-	-	9-KODE	Lipids	734000	785000	749000	414000	531000	320000	1430000	1560000	955000	182000	374000	822000
pmb2789	309	209	7.54	310	[M-H]-	-	13-HpOTrE(r)	Lipids	107000	114000	120000	16100	7380	10000	280000	288000	147000	93900	152000	321000
pmb2791	309.1	209.1	7.55	310.1	[M-H]-	-	9-HpOTrE	Lipids	289000	279000	283000	66700	98900	58800	195000	315000	185000	121000	289000	869000
pmb2792	293	193.1	7.81	294	[M-H]-	-	13-HOTrE(r)	Lipids	508000	504000	489000	607000	684000	423000	262000	729000	454000	330000	349000	822000
pmb2804	311.1	171.3	7.87	312.1	[M-H]-	C04717	13-HPODE	Lipids	283000	312000	300000	54200	40300	46400	501000	599000	197000	124000	199000	752000
pmb2826	147	87.1	1.03	148	[M-H]-	C00815	Citramalate	Organic acids and derivatives	3670000	3470000	3450000	3500000	4100000	3410000	2480000	2700000	2850000	2050000	1540000	2020000
pmb2831	315.1	153.1	2.44	316.1	[M-H]-	-	Protocatechuic acid O-glucoside	Polyphenol	572000	570000	564000	489000	439000	394000	329000	381000	282000	842000	788000	756000
pmb2835	181.1	166	3.95	182.1	[M-H]-	-	Syringaldehyde	Phenylpropanoids	62500	64100	69000	150000	124000	131000	9590	14500	16500	30200	24400	23600
pmb2848	347.1	267.1	5.79	348.1	[M-H]-	-	3(2'-Chlorophenyl)-7-hydroxy-4-phenylcoumarin	Phenylpropanoids	71500	61400	84400	9	9	9	267000	244000	214000	11400	25000	29000
pmb2849	347.1	125.1	4.63	348.1	[M-H]-	C01897	Camptothecin	Alkaloids	15100	18200	17700	9	7770	10400	9800	13600	13500	46400	35100	40700
pmb2855	307	145	0.77	308	[M-H]-	-	L-Glutamine O-hexside	Amino acid and derivatives	102000	77500	87000	87900	102000	86500	117000	155000	121000	59300	34600	57000
pmb2857	308.1	146.1	0.8	309.1	[M-H]-	-	L-Glutamic acid O-glucoside	Amino acid and derivatives	43000	24600	24500	34200	28500	29800	34600	28100	42900	46900	35300	36100
pmb2858	665.1	161	0.81	666.1	[M-H]-	C02052	Maltotetraose	Carbohydrates	9750	13700	25200	9	20700	17400	9	9	9	9	9	9
pmb2867	350.1	144.1	1.72	351.1	[M-H]-	-	Kynurenic acid O-hexside	Organic acids and derivatives	36500	35800	37700	50000	54200	41900	31100	23100	29700	22700	34200	24400
pmb2871	315.1	153	1.84	316.1	[M-H]-	-	"2,5-dihydroxy benzoic acid O-hexside"	Organic acids and derivatives	312000	333000	423000	539000	652000	492000	160000	184000	138000	240000	154000	210000
pmb2873	214.1	134	3.65	215.1	[M-H]-	-	3-(2-Naphthyl)-D-alanine	Amino acid and derivatives	311000	252000	301000	574000	745000	890000	225000	636000	889000	490000	424000	1720000
pmb2922	565.1	323.1	1.11	566.1	[M-H]-	C00029	Uridine 5'-diphospho-D-glucose	Nucleotide and derivates	8550000	9960000	8790000	6280000	6220000	6000000	15000000	11700000	12400000	10000000	8990000	9560000
pmb2933	311.1	149.1	2.16	312.1	[M-H]-	-	Caftaric acid	Phenylpropanoids	64300	67200	72700	72200	83500	66700	72000	66500	72200	72100	68700	65700
pmb2938	353.1	100.9	3	354.1	[M-H]-	-	4-O-Caffeoyl quinic acid (criptochlorogenic acid)	Organic acids and derivatives	120000	114000	98100	191000	160000	129000	70800	46200	50300	43400	46800	53300
pmb2940	385.1	205	3.26	386.1	[M-H]-	-	1-O-beta-D-Glucopyranosyl sinapate	Phenylpropanoids	10300000	11100000	10800000	13200000	12800000	13800000	9310000	9930000	10500000	5700000	5770000	6400000
pmb2947	865.1	407.1	3.44	866.1	[M-H]-	-	Catechin-catechin-catechin	Polyphenol	53100	54000	59900	42700	41800	52700	42000	24400	28500	59400	36700	45200
pmb2954	771.1	609.3	2.83	772.1	[M-H]-	-	Luteolin O-hexosyl-O-hexosyl-O-hexoside	Flavone	27600	29200	26300	9	9	14900	9230	9	9	56000	64300	45800
pmb2957	465.1	285.1	2.59	466.1	[M-H]-	-	Cyanidin O-syringic acid	Anthocyanins	60300	42000	44800	26700	25800	19200	38100	26100	28800	69700	59000	53400
pmb2987	487.1	163	2.63	488.1	[M-H]-	-	Acacetin O-acetyl hexoside	Flavone	46300	69900	51600	9	9	50300	75100	69700	61100	102000	65700	58200
pmb3000	503.1	341.1	3.94	504.1	[M-H]-	-	Chrysoeriol O-acetylhexoside	Flavone	19600	20600	19600	11300	9	19100	8480	12500	13400	40800	32700	34900
pmb3002	607.1	299	3.98	608.1	[M-H]-	-	Chrysoeriol 7-O-rutinoside	Flavone	22600	22600	13800	9110	11000	10000	11100	6590	9860	15100	11000	17800
pmb3006	431.1	269.1	4.21	432.1	[M-H]-	C04608	Apigenin 7-O-glucoside (Cosmosiin)	Flavone	107000	85000	102000	83600	75000	60100	75500	67200	66800	174000	134000	116000
pmb3023	449.1	287	3.37	450.1	[M-H]-	-	Eriodictyol C-hexoside	Flavone	680000	596000	672000	187000	220000	204000	165000	208000	230000	1360000	1590000	1350000
pmb3024	447.1	327.1	3.45	448.1	[M-H]-	-	Luteolin C-hexoside	Flavone	23400	17200	25100	9	9	9	9	9	19500	28600	20000	23600
pmb3028	535	491.3	3.75	536	[M-H]-	-	Tricin O-sinapic acid	Flavone	136000	175000	103000	83700	57800	110000	118000	82100	114000	174000	170000	164000
pmb3031	403.1	313.1	5.23	404.1	[M-H]-	-	Tricin O-glycerol	Flavone	32600	28300	37400	53200	56500	44000	58000	71900	53300	85000	79400	71100
pmb3041	521.1	329.2	3.81	522.1	[M-H]-	-	Tricin O-saccharic acid	Flavone	271000	282000	248000	489000	680000	544000	9	9	9	9	9	9
pmb3043	637.1	329.2	4.07	638.1	[M-H]-	-	Tricin 5-O-rutinoside	Flavone	25200	26900	30400	22700	13600	9	8270	9	14000	46700	28200	20200
pmb3044	653.1	329.2	4.16	654.1	[M-H]-	-	Tricin di-O-hexoside	Flavone	56900	54900	66500	29900	22200	21700	27700	24800	27500	141000	107000	116000
pmb3056	355.1	121.1	1.89	356.1	[M-H]-	-	Homovanilloyl quinic acid	Organic acids and derivatives	12200	16500	13000	21600	11300	13600	9	9	9	21700	17800	14400
pmb3066	481.1	319.2	2.62	482.1	[M-H]-	-	5-O-p-coumaroyl shikimic acid O-hexoside	Organic acids and derivatives	101000	128000	94500	84900	92700	71900	47500	44000	78200	163000	141000	209000
pmb3072	481.1	319.3	3.23	482.1	[M-H]-	-	3-O-p-coumaroyl shikimic acid O-hexoside	Organic acids and derivatives	80400	60300	67000	49300	50800	40100	36200	34700	45100	133000	105000	109000
pmb3074	337.1	191.1	3.3	338.1	[M-H]-	-	3-O-p-Coumaroyl quinic acid	Organic acids and derivatives	31700	28100	37000	30500	57100	16400	25600	48400	24900	57900	30200	28300
pmb3079	300.1	96.9	1.15	301.1	[M-H]-	C04256	N-Acetylglucosamine 1-phosphate	Others	18900	20600	32200	20300	27600	40200	27400	14800	26700	25800	20600	17900
pmb3081	289.1	97	1.08	290.1	[M-H]-	-	Glucarate O-Phosphoric acid	Others	228000	239000	246000	130000	202000	268000	262000	195000	277000	267000	296000	232000
pmb3088	421.1	241.1	0.71	422.1	[M-H]-	C00689	Trehalose 6-phosphate	Carbohydrates	501000	517000	457000	944000	980000	933000	211000	177000	167000	184000	190000	170000
pmb3099	153	125	1.56	154	[M-H]-	C06608	Diethyl phosphate	Organic acids and derivatives	3310000	3210000	3500000	3460000	4070000	3440000	2230000	5180000	5010000	2860000	4150000	4960000
pmb3101	175.1	115	2.75	176.1	[M-H]-	C02504	2-Isopropylmalate	Organic acids and derivatives	25700000	25500000	24900000	18500000	19000000	20600000	13900000	15200000	16600000	37100000	36100000	37700000
pmb3107	359.1	182.1	2.26	360.1	[M-H]-	-	Syringic acid O-glucoside	Organic acids and derivatives	2620000	2450000	2300000	3920000	5170000	5690000	335000	271000	319000	562000	547000	451000
pmb3110	167	108	3.31	168	[M-H]-	C06672	Vanillic acid	Phenylpropanoids	62700	64100	49500	59600	66600	77700	9	36300	21800	28700	24500	23100
pmb3114	561.1	289.2	3.61	562.1	[M-H]-	-	Epicatechin-epiafzelechin	Polyphenol	754000	858000	867000	421000	244000	552000	551000	482000	756000	1650000	1230000	1250000
pmb3116	474.2	278.3	7.72	475.2	[M-H]-	-	LysoPE 18:3	Lipids	15300	11500	9720	15700	14700	11700	11400	11100	10000	10800	20900	16600
pmb3117	452	255.3	8.74	453	[M-H]-	-	LysoPE 16:0	Lipids	4250000	4190000	4440000	2110000	1540000	1160000	16100000	9100000	4710000	1060000	1330000	6270000
pmb3121	478.1	281.3	9.03	479.1	[M-H]-	-	LysoPE 18:1	Lipids	10100000	9850000	10100000	2600000	1450000	1960000	6600000	6310000	4210000	28700000	33600000	31700000
pmb3132	478.1	281.2	8.86	479.1	[M-H]-	-	LysoPE 18:1 (2n isomer)	Lipids	11100000	10600000	11000000	2730000	1690000	2080000	7840000	7300000	5680000	33500000	36700000	35000000
pmb3894	329.1	229.1	5.91	330.1	[M-H]-	-	Di-O-methylquercetin	Flavonol	7970000	8110000	8140000	960000	617000	806000	11200000	12500000	4600000	2040000	3260000	13100000
pmb5304	277.1	241.2	10.62	278.1	[M-H]-	C06427	α-Linolenic acid	Lipids	55300	34800	44300	38000	37900	26800	52100	50500	51200	65000	62100	57300
pmc0066	333.1	137.1	0.7	332.05	[M+H]+	C06196	2'-Deoxyinosine-5'-monophosphate	Nucleotide and derivates	18800000	18300000	21100000	9910000	8410000	10400000	21800000	17400000	17700000	28800000	30000000	32000000
pmc0274	167.1	121.1	1.92	166.1	[M+H]+	C16614	6-Methylmercaptopurine	Nucleotide and derivates	67700000	68100000	66800000	21900000	28900000	29900000	87000000	80200000	92500000	43300000	46300000	58800000
pmc0281	400.2	136.1	1.94	399.2	[M+H]+	-	Adenosine O-ribose	Nucleotide and derivates	3760000	3620000	3290000	4130000	4300000	3570000	3180000	2760000	2800000	1540000	1470000	1450000
pmc0304	384.1	252	2.06	383.12	[M+H]+	-	Succinyladenosine	Nucleotide and derivates	29000000	29400000	30100000	25400000	23700000	24000000	30300000	21200000	30100000	27900000	28500000	24800000
pmc0960	544.4	485.2	8.91	543.4	[M+H]+	-	LysoPC 20:4	Lipids	17200000	16600000	17000000	5030000	2140000	3640000	9190000	13800000	8760000	25800000	37000000	47500000
pmd0017	203	83	0.62	202	[M+H]+	C00750	Spermine	Phenolamides	88300000	98400000	85400000	101000000	89000000	88400000	116000000	85500000	107000000	114000000	114000000	101000000
pmd0130	468.3	184	7.73	467.3	[M+H]+	-	LysoPC 14:0 (2n isomer)	Lipids	2560000	2550000	2420000	3550000	1820000	1720000	3860000	3240000	1780000	1090000	1740000	3310000
pmd0132	496.3	184	8.8	495.33	[M+H]+	-	LysoPC 16:0 (2n isomer)	Lipids	19500000	19000000	17400000	12500000	5990000	5260000	89400000	51600000	19100000	11200000	20300000	96500000
pmd0136	524.4	184	9.91	523.36	[M+H]+	-	LysoPC 18:0	Lipids	39500000	40100000	35600000	109000000	134000000	61600000	302000000	238000000	102000000	3120000	5730000	42800000
pmd0144	550.4	184	9.96	549.37	[M+H]+	-	LysoPC 20:1 (2n isomer)	Lipids	195000	347000	366000	9	9	9	9	9	222000	1120000	1570000	2810000
pmd0158	424.2	227.2	7.51	425.2	[M-H]-	-	LysoPE 14:0 (2n isomer)	Lipids	95700	81600	91900	72300	50500	41900	123000	101000	54800	59000	76300	112000
pmd0160	452.3	255.2	8.73	453.3	[M-H]-	-	LysoPE 16:0 (2n isomer)	Lipids	4520000	4440000	4600000	2250000	1650000	1460000	16800000	9510000	4860000	1160000	1440000	6700000
pme0001	609.2	301	4.07	610.19	[M-H]-	C09806	Hesperetin 7-O-neohesperidoside (Neohesperidin)	Flavanone	3460000	3450000	3710000	1980000	2040000	2190000	2640000	2490000	2120000	6340000	6070000	5040000
pme0003	188.1	145	0.81	189.11	[M-H]-	C02427	L-Homocitrulline	Amino acid and derivatives	31800	34000	37600	15600	16200	25200	31900	38700	33900	41700	41300	30600
pme0005	121	94	1.44	120.04	[M+H]+	C15587	Purine	Nucleotide and derivates	5170000	5120000	5540000	2880000	2120000	1950000	3640000	3220000	3730000	12900000	13500000	9670000
pme0006	116.1	70.1	0.81	115.06	[M+H]+	C00148	L-Proline	Amino acid and derivatives	70800000	64100000	61100000	39900000	35200000	31900000	91900000	79400000	92800000	143000000	152000000	168000000
pme0007	174.1	131.1	0.79	175.1	[M-H]-	C00327	L-Citrulline	Amino acid and derivatives	208000	199000	225000	218000	236000	209000	191000	176000	143000	167000	226000	192000
pme0009	104	73.7	0.79	105.04	[M-H]-	C00065	L-Serine	Amino acid and derivatives	1840000	1930000	2000000	2050000	2120000	2120000	1420000	1140000	1290000	1970000	1770000	1900000
pme0011	132	88	0.8	133.04	[M-H]-	C00049	L-Aspartic acid	Amino acid and derivatives	12300000	12500000	11500000	2160000	2980000	2330000	18400000	14900000	16800000	25600000	26900000	25100000
pme0013	146.1	102	0.75	147.05	[M-H]-	C00025	L-Glutamic acid	Amino acid and derivatives	7900000	7200000	6990000	1390000	1770000	1750000	7620000	6270000	7880000	29100000	27600000	24800000
pme0016	241	152	0.78	240.02	[M+H]+	C00491	L-(-)-Cystine	Amino acid and derivatives	44600	33200	40100	26500	69000	39600	194000	172000	118000	270000	263000	312000
pme0019	132.1	86.2	1.27	131.09	[M+H]+	C00123	L-Leucine	Amino acid and derivatives	853000000	826000000	852000000	1090000000	961000000	953000000	609000000	584000000	549000000	318000000	326000000	358000000
pme0021	166	120	1.93	165.08	[M+H]+	C00079	L-Phenylalanine	Amino acid and derivatives	64800000	65700000	63200000	19700000	23000000	21300000	83300000	78100000	85700000	42200000	47700000	58100000
pme0022	118	73.9	0.76	119.06	[M-H]-	C00188	L-Threonine	Amino acid and derivatives	4230000	5470000	4560000	3800000	4150000	3610000	4150000	3340000	3410000	2920000	3360000	3350000
pme0024	124	80	0.83	125.02	[M-H]-	C00245	2-Aminoethanesulfonic acid	Organic acids and derivatives	45500	40200	47000	37800	69700	35200	27500	35400	51000	55400	37200	35900
pme0026	147	84	0.78	146.11	[M+H]+	C00047	L-(+)-Lysine	Amino acid and derivatives	21000000	20800000	20000000	34300000	28400000	21100000	11700000	8380000	9500000	18100000	20400000	21600000
pme0030	182.1	136.1	1.16	181.07	[M+H]+	C00082	L-(-)-Tyrosine	Amino acid and derivatives	3600000	3640000	3600000	5050000	3780000	3570000	3080000	2700000	1960000	1380000	1320000	1570000
pme0033	137	119	1.16	136.04	[M+H]+	C00262	Hypoxanthine	Nucleotide and derivates	20400000	23000000	21300000	4950000	6440000	9900000	10700000	12300000	21000000	40500000	39500000	47700000
pme0036	154.1	137	0.72	155.07	[M-H]-	C00135	L-Histidine	Amino acid and derivatives	3750000	3810000	3850000	5060000	4630000	4270000	4000000	4110000	3970000	2250000	2250000	2390000
pme0038	112	95	0.82	111.04	[M+H]+	C00380	Cytosine	Nucleotide and derivates	3640000	3730000	3730000	4250000	3280000	2860000	4060000	2760000	3270000	2150000	2560000	2550000
pme0039	118.1	72.1	0.85	117.08	[M+H]+	C00183	L-Valine	Amino acid and derivatives	152000000	150000000	149000000	190000000	157000000	143000000	103000000	92300000	100000000	106000000	113000000	117000000
pme0040	136.1	119	1.16	135.05	[M+H]+	C00147	Adenine	Nucleotide and derivates	21400000	21400000	20300000	6250000	4620000	4100000	21700000	19200000	24600000	44000000	40700000	40100000
pme0041	132	86	1.26	131.09	[M+H]+	C00407	L-Isoleucine	Amino acid and derivatives	843000000	817000000	831000000	1060000000	957000000	932000000	594000000	548000000	539000000	303000000	310000000	337000000
pme0042	173.1	131.1	0.73	174.11	[M-H]-	C00062	L-(+)-Arginine	Amino acid and derivatives	7570000	12200000	12300000	8580000	12400000	8930000	8060000	7530000	6360000	11000000	11200000	12000000
pme0048	108	64	0.76	109.02	[M-H]-	C00519	2-Aminoethanesulfinic acid	Organic acids and derivatives	5920	14100	13600	17700	18700	12600	11400	9	7100	7290	5870	9
pme0056	145.1	101	2.57	146.06	[M-H]-	-	"2,3-dimethylsuccinic acid"	Amino acid and derivatives	904000	859000	892000	1010000	1070000	752000	482000	549000	457000	1050000	1160000	1070000
pme0066	116.1	74	0.75	117.05	[M-H]-	C00581	Guanidineacetic acid	Amino acid and derivatives	33000	27400	28400	24800	44300	28800	36800	37900	42500	31100	36300	20300
pme0076	190.1	130	1.16	189.06	[M+H]+	C00624	N-Acetyl-L-glutamic acid	Amino acid and derivatives	1450000	1890000	1430000	1780000	1200000	1840000	2150000	2000000	1700000	1390000	1480000	1340000
pme0085	359.3	196.7	3.87	360.3	[M-H]-	C01850	Rosmarinic acid	Organic acids and derivatives	43500	34300	51500	73000	67500	47900	9	12800	8750	32100	36000	22600
pme0089	287.1	153	5	286.1	[M+H]+	C01514	Luteolin	Flavone	85200	91200	91600	145000	188000	187000	91800	257000	171000	127000	206000	201000
pme0108	126.1	109	1.16	125.06	[M+H]+	C02376	5-Methylcytosine	Nucleotide and derivates	697000	658000	837000	629000	489000	329000	644000	564000	426000	1570000	1480000	1250000
pme0109	212.2	166	1.45	211.08	[M+H]+	C07194	"(-)-3-(3,4-Dihydroxyphenyl)-2-methylalanine"	Amino acid and derivatives	441000	523000	587000	338000	370000	270000	475000	437000	529000	610000	709000	738000
pme0113	251.3	84	1.13	250.06	[M+H]+	C00669	γ-Glu-Cys	Amino acid and derivatives	116000	130000	124000	92900	142000	102000	111000	86600	225000	40100	47200	43400
pme0120	118.2	101	0.84	117.08	[M+H]+	C00431	5-Aminovaleric acid	Amino acid and derivatives	117000	156000	120000	136000	126000	78400	107000	112000	106000	155000	118000	153000
pme0122	189.2	126	1.14	188.12	[M+H]+	C02727	N6-Acetyl-L-lysine	Amino acid and derivatives	1490000	1290000	1160000	1950000	1320000	994000	956000	854000	1000000	375000	465000	511000
pme0124	173.2	115.5	0.85	172.08	[M+H]+	-	Glycyl-L-proline	Amino acid and derivatives	33700	36200	37600	9	9	9	20700	9	32300	43200	50700	40600
pme0128	159.2	88	0.75	160.08	[M-H]-	C00993	D-Alanyl-D-Alanine	Amino acid and derivatives	27300	27900	23100	17100	23300	18700	27900	27000	19000	8640	3920	9260
pme0132	279.3	164	2.37	280.11	[M-H]-	-	Asp-phe	Amino acid and derivatives	36100	36100	33100	89600	111000	83000	7940	7970	9	10000	8980	10700
pme0137	187.2	125	1.11	188.08	[M-H]-	-	Nα-Acetyl-L-glutamine	Amino acid and derivatives	263000	248000	267000	360000	260000	272000	181000	201000	197000	322000	302000	356000
pme0161	118.1	72	0.75	119.06	[M-H]-	C00263	L-Homoserine	Amino acid and derivatives	85800	110000	83400	101000	68100	78000	76000	78700	66300	57900	49400	57200
pme0163	335.1	123	0.8	334.06	[M+H]+	C00455	β-Nicotinamide mononucleotide	Nucleotide and derivates	102000	82700	94200	71800	63500	98100	133000	154000	59800	78100	93200	144000
pme0164	263.1	204	3.9	264.11	[M-H]-	C05642	N-γ-Acetyl-N-2-Formyl-5-methoxykynurenamine	Amino acid and derivatives	72100	85700	84400	50000	42600	59000	105000	120000	93300	55300	54000	59200
pme0171	158.1	74	2.84	159.09	[M-H]-	-	N-Isovaleroylglycine	Amino acid and derivatives	18200	15800	11300	39000	35800	18500	4990	7280	9	9	9	9
pme0174	132.1	57	1.29	131.06	[M+H]+	-	N-Propionylglycine	Amino acid and derivatives	520000	455000	469000	824000	548000	503000	536000	377000	388000	230000	195000	254000
pme0181	170.1	124	0.72	169.09	[M+H]+	C01152	1-Methylhistidine	Amino acid and derivatives	782000	876000	802000	770000	744000	798000	870000	807000	765000	772000	698000	758000
pme0183	152.1	135	0.86	151.05	[M+H]+	-	2-Hydroxy-6-aminopurine	Nucleotide and derivates	19200000	17000000	23400000	4880000	3560000	2740000	16700000	11200000	12300000	24300000	22800000	23000000
pme0191	189.1	86	1.91	188.12	[M+H]+	C02155	N-Glycyl-L-leucine	Amino acid and derivatives	8580000	8070000	9450000	21600000	20000000	17800000	1110000	1230000	1060000	1970000	2110000	1890000
pme0197	609.2	301	3.7	610.15	[M-H]-	C05625	Quercetin 3-O-rutinoside (Rutin)	Flavonol	3190000	3010000	3500000	1730000	1530000	1740000	2460000	1850000	2040000	5770000	5790000	5280000
pme0199	301	151	5.12	302.04	[M-H]-	C00389	Quercetin	Flavonol	40300	37100	33800	18800	10400	11800	13000	16100	12000	18800	17500	13200
pme0205	289.1	245	3	290.08	[M-H]-	C06562	Catechin	Polyphenol	126000	114000	121000	357000	317000	357000	95600	9	9	194000	181000	224000
pme0207	103	59.1	1.29	104.05	[M-H]-	-	3-Hydroxybutyrate	Organic acids and derivatives	142000	164000	158000	364000	246000	196000	9	9	9	9	9	9
pme0226	131.1	114	0.78	132.05	[M-H]-	C00152	L-Asparagine	Amino acid and derivatives	7570000	9140000	9530000	2240000	4900000	3290000	5710000	5550000	5750000	15300000	14900000	15300000
pme0230	268.1	136	1.83	267.1	[M+H]+	C00212	Adenosine	Nucleotide and derivates	7730000	8220000	7980000	15300000	11300000	12100000	7140000	4580000	4300000	2190000	2640000	3080000
pme0234	190	144	2.66	189.04	[M+H]+	C01717	Kynurenic acid	Organic acids and derivatives	19700000	19900000	18700000	16600000	12900000	12100000	19200000	12500000	16900000	15400000	18100000	21600000
pme0240	121	77	4.57	122.04	[M-H]-	C00180	Benzoic acid	Organic acids and derivatives	1910000	1900000	2010000	1110000	3400000	1040000	655000	1660000	1480000	1150000	837000	1890000
pme0243	131	87	1.86	132.04	[M-H]-	C00489	Glutaric acid	Organic acids and derivatives	1110000	1110000	1140000	1080000	1040000	1160000	1100000	1290000	1030000	915000	913000	1010000
pme0246	122	76	0.77	121.02	[M+H]+	C00097	L-Cysteine	Amino acid and derivatives	41500	30900	45700	23100	49500	35200	39700	70800	67600	41300	32200	71000
pme0247	130.1	84	0.76	131.06	[M-H]-	C01157	trans-4-Hydroxy-L-proline	Amino acid and derivatives	33200	42200	44100	32600	23700	30000	50200	39400	51800	55600	81500	81000
pme0249	189.1	97	4.47	188.1	[M+H]+	C08261	Azelaic acid	Organic acids and derivatives	184000	157000	163000	79000	57000	50900	299000	259000	171000	175000	196000	334000
pme0252	172.1	130	3.51	173.11	[M-H]-	C02710	N-Acetyl-l-leucine	Amino acid and derivatives	508000	560000	546000	515000	490000	511000	474000	464000	477000	767000	909000	728000
pme0256	151	151	1.19	152.03	[M-H]-	C00385	Xanthine	Nucleotide and derivates	93100	115000	108000	75700	69500	98200	67300	161000	103000	165000	127000	97100
pme0258	113	70	1.23	112.03	[M+H]+	C00106	Uracil	Nucleotide and derivates	370000	354000	381000	293000	257000	233000	562000	342000	500000	680000	615000	541000
pme0264	243.1	127	1.99	242.09	[M+H]+	C00214	Thymidine	Nucleotide and derivates	209000	193000	225000	199000	223000	309000	222000	9	134000	98100	98300	80200
pme0267	131	87	2.12	132.04	[M-H]-	-	2-Methylsuccinic acid	Organic acids and derivatives	1160000	1130000	1090000	1120000	1050000	1140000	1090000	1270000	998000	958000	950000	950000
pme0269	229.2	211	6.16	230.15	[M-H]-	C02678	Dodecanedioic aicd	Organic acids and derivatives	6690	6310	4440	6500	3100	5580	8660	11500	3300	3690	3230	3780
pme0271	115	71	1.33	116.01	[M-H]-	C01384	Maleic acid	Organic acids and derivatives	49200	72800	62900	51200	74200	24700	43100	37900	52700	33200	31300	39200
pme0274	132.1	69	1.2	131.09	[M+H]+	C02378	6-Aminocaproic acid	Organic acids and derivatives	60900000	56600000	57900000	88000000	71000000	66000000	47700000	43600000	41000000	20400000	21200000	22600000
pme0275	115	97	1.93	116.05	[M-H]-	-	4-Oxopentanoate	Organic acids and derivatives	14600	19400	24500	37800	24000	15000	9	9	9	9	9	9
pme0279	189.1	171	0.79	190.1	[M-H]-	C00666	"2,6-Diaminooimelic acid"	Amino acid and derivatives	247000	225000	212000	106000	133000	103000	182000	197000	231000	468000	369000	438000
pme0281	165	121	2.96	166.03	[M-H]-	C06337	Terephthalic acid	Organic acids and derivatives	5890000	5970000	5940000	6440000	8050000	6350000	5900000	7320000	6660000	6130000	6610000	5830000
pme0282	165	77	2.95	166.03	[M-H]-	C01606	Phthalic acid	Organic acids and derivatives	397000	382000	378000	384000	468000	413000	328000	345000	359000	393000	363000	338000
pme0284	144.1	102	0.84	145.09	[M-H]-	C01035	4-Guanidinobutyric acid	Organic acids and derivatives	36500	29900	37400	23700	33300	26100	12100	16400	25200	51300	44400	44900
pme0286	131.1	85	3.52	132.08	[M-H]-	-	2-Hydroxyisocaproic acid	Organic acids and derivatives	5190000	5210000	5120000	14700000	13500000	16000000	40200	63800	54200	71300	84500	58100
pme0300	149.1	103	5.45	148.05	[M+H]+	C00423	trans-Cinnamate	Phenylpropanoids	256000	274000	227000	1080000	912000	590000	9	9	9	9	9	9
pme0303	179	135	3.23	180.04	[M-H]-	C01197	Caffeate	Phenylpropanoids	3830000	3770000	3720000	1160000	1270000	1940000	5090000	5260000	3880000	4040000	4010000	5300000
pme0305	193.1	134	4.07	194.06	[M-H]-	C01494	Ferulic acid	Phenylpropanoids	4860000	4960000	4830000	1580000	1230000	1810000	12100000	11100000	9410000	1780000	1520000	2070000
pme0309	183	124	3.14	184.04	[M-H]-	-	Methyl gallate	Organic acids and derivatives	198000	236000	220000	48100	64100	46000	160000	68800	81900	388000	288000	283000
pme0321	431.1	285	4.94	432.11	[M-H]-	-	Kaempferol 7-O-rhamnoside	Flavonol	55700	58700	54800	16100	360000	9240	21800	21300	9770	22100	24400	28800
pme0330	579.2	271	4.17	580.18	[M-H]-	C09789	Naringenin 7-O-neohesperidoside (Naringin)	Flavanone	751000	753000	711000	649000	600000	502000	704000	524000	551000	971000	977000	936000
pme0355	255.1	137	4.97	254.06	[M+H]+	C10208	Daidzein	Isoflavone	53400	45300	30900	34100	46100	48900	53400	39600	60300	61800	81200	62000
pme0359	433.1	271	3.81	432.11	[M+H]+	-	Apigenin 5-O-glucoside	Flavone	290000	237000	311000	263000	262000	243000	268000	185000	201000	697000	297000	300000
pme0368	579.2	271	4.01	578.16	[M+H]+	-	Apigenin 7-rutinoside (Isorhoifolin)	Flavone	40300	62300	27700	25700	29300	27200	18400	17700	33900	31200	42600	46700
pme0369	593.2	285	3.83	594.16	[M-H]-	-	Kaempferol 3-O-rutinoside (Nicotiflorin)	Flavonol	2120000	2230000	2390000	1510000	1380000	1690000	1790000	1600000	1510000	4010000	3630000	3900000
pme0371	433.1	271	4.22	434.12	[M-H]-	C09099	Naringenin 7-O-glucoside (Prunin)	Flavanone	31600000	30000000	30100000	27100000	26800000	22100000	23700000	19800000	24100000	45900000	40300000	39600000
pme0377	273.1	153	5.59	272.07	[M+H]+	C00509	Naringenin	Flavanone	440000	420000	426000	82500	59300	71200	259000	266000	427000	1310000	962000	752000
pme0387	181.1	122	3.04	182.06	[M-H]-	C05582	Homovanillic acid	Phenylpropanoids	14900	12800	13500	19300	10700	9	10400	13800	16600	11100	16100	12300
pme0397	173.1	93	0.81	174.05	[M-H]-	C00493	Shikimic acid	Organic acids and derivatives	189000	110000	158000	44800	135000	110000	114000	117000	103000	949000	854000	668000
pme0408	197.1	123	3.41	198.05	[M-H]-	C10833	Syringic acid	Phenylpropanoids	34700	27300	29700	64000	54700	44200	9	9	9	9	9	9
pme0414	153	93	4.01	152.05	[M+H]+	C00755	Vanillin	Organic acids and derivatives	974000	1060000	1040000	1190000	1140000	1030000	474000	683000	502000	699000	642000	777000
pme0418	165.1	119	3.71	166.06	[M-H]-	C01744	3-(4-Hydroxyphenyl)propionic acid	Phenylpropanoids	60700	64700	87000	103000	77100	125000	59200	62400	67500	33600	31000	42700
pme0422	193.1	134	4.08	194.06	[M-H]-	-	3-Hydroxy-4-methoxycinnamic acid	Phenylpropanoids	4940000	4880000	4840000	1560000	1240000	1890000	12900000	10800000	9690000	1770000	1560000	2120000
pme0429	239.1	193	5.18	238.08	[M+H]+	-	"3,4,5-Trimethoxycinnamic acid"	Phenylpropanoids	121000	89300	141000	81500	74300	77600	92300	97800	93500	125000	124000	137000
pme0434	577	407.1	3.03	578.14	[M-H]-	-	Procyanidin B2	Proanthocyanidins	700000	943000	858000	408000	338000	474000	639000	487000	647000	1420000	1140000	1070000
pme0436	577.1	407.1	2.79	578.14	[M-H]-	-	Procyanidin B3	Proanthocyanidins	23200	10800	18500	11600	23200	18500	14700	20100	8770	16300	15100	15400
pme0460	291	139	3.32	290.3	[M+H]+	C09727	L-Epicatechin	Polyphenol	20500000	21200000	20500000	15200000	9430000	17900000	13400000	9310000	18800000	31300000	26000000	26100000
pme0463	175	84	1.16	174.1	[M+H]+	C01047	L-Theanine	Amino acid and derivatives	20100000	22600000	18100000	18400000	17500000	13100000	32300000	18000000	18200000	13200000	14600000	15700000
pme0474	139	95	3.07	138.03	[M+H]+	C00156	4-Hydroxybenzoic acid	Organic acids and derivatives	2770000	2660000	2900000	4490000	4110000	3900000	463000	301000	432000	1980000	1040000	993000
pme0486	117	73	1.33	118.03	[M-H]-	C02170	Methylmalonic acid	Organic acids and derivatives	35200000	35100000	34200000	36400000	40400000	39000000	37900000	39800000	34600000	18900000	21500000	19800000
pme0490	124	78	1.16	123	[M+H]+	C00253	Nicotinic acid	Vitamins and derivatives	2130000	2250000	2470000	1410000	1190000	2080000	1690000	2800000	2760000	4310000	2370000	3190000
pme0500	503.4	323	0.81	504.17	[M-H]-	-	D(+)-Melezitose	Carbohydrates	4450000	4490000	3360000	8350000	5810000	6000000	127000	75100	133000	57100	49700	39500
pme0516	179.2	87	0.74	180.06	[M-H]-	C00137	Inositol	Alcohols	1140000	1120000	1190000	1080000	1080000	1080000	1580000	1660000	1590000	994000	1020000	1100000
pme0519	341	119	0.8	342.12	[M-H]-	-	D-(+)-Sucrose	Carbohydrates	3940000	3560000	3480000	3690000	4530000	2970000	1220000	1330000	1410000	246000	215000	250000
pme0534	195.2	74.9	0.63	196.06	[M-H]-	C00257	Gluconic acid	Others	2990000	3140000	3420000	3390000	2920000	3060000	2640000	2760000	3150000	3990000	4090000	3830000
pme1002	138.1	103	1.26	137.08	[M+H]+	C00483	L-Tyramine	Amino acid and derivatives	24000000	23200000	26100000	10700000	10700000	10200000	18900000	13800000	17400000	58300000	55600000	46300000
pme1014	445.3	341.3	10.77	444.3	[M+H]+	C00828	Menaquinone (K2)	Vitamins and derivatives	12400000	8620000	14300000	9	9	9	9	9	9	3990000	9	3400000
pme1018	613.2	484	1.16	612.15	[M+H]+	C00127	Glutathione oxidized	Amino acid and derivatives	538000	597000	604000	74500	78000	114000	1170000	737000	1160000	580000	584000	836000
pme1063	243.1	110	1.24	244.07	[M-H]-	C00299	Uridine	Nucleotide and derivates	118000	121000	123000	87700	86400	71300	147000	148000	153000	245000	179000	224000
pme1086	306	143	1.17	307.08	[M-H]-	C00051	Glutathione reduced form	Amino acid and derivatives	958000	993000	1030000	276000	385000	1010000	940000	1390000	3280000	121000	127000	271000
pme1107	150	133	1.32	151.05	[M-H]-	C00242	Guanine	Nucleotide and derivates	25400	33000	44200	54500	19600	25400	22600	11700	28700	54900	46800	45100
pme1119	269.1	137	0.83	268.08	[M+H]+	C00294	Inosine	Nucleotide and derivates	597000	477000	513000	253000	284000	229000	433000	362000	440000	697000	425000	472000
pme1178	284.1	152	1.52	283.09	[M+H]+	C00387	Guanosine	Nucleotide and derivates	19400000	18900000	17900000	18900000	18300000	15900000	14400000	10300000	12100000	22400000	21900000	20000000
pme1194	228	112	1.16	227.09	[M+H]+	C00881	Deoxycytidine	Nucleotide and derivates	1090000	1160000	777000	806000	509000	426000	2380000	1560000	1900000	1580000	1830000	2090000
pme1201	273.1	167	5.56	274.08	[M-H]-	C00774	Phloretin	Flavanone	409000	388000	403000	384000	1210000	367000	544000	496000	438000	806000	623000	657000
pme1210	150	61	1.15	149.05	[M+H]+	C00073	L-Methionine	Amino acid and derivatives	2930000	2850000	2650000	2800000	2660000	1950000	3390000	2510000	3320000	1840000	1970000	2300000
pme1218	124	106	1.15	123.03	[M+H]+	C10164	2-Picolinic acid	Organic acids and derivatives	505000	629000	532000	322000	374000	394000	468000	711000	616000	1080000	1090000	613000
pme1228	221.1	204	1.66	220.09	[M+H]+	C00643	5-Hydroxy-L-tryptophan	Amino acid and derivatives	594000	576000	609000	579000	503000	491000	663000	318000	584000	290000	302000	400000
pme1242	322.4	130	1.24	321.1	[M+H]+	C11347	S-(methyl)glutathione	Amino acid and derivatives	588000	626000	543000	301000	398000	388000	1140000	710000	701000	667000	804000	751000
pme1283	383	134	1.36	384.12	[M-H]-	C00021	S-(5'-Adenosy)-L-homocysteine	Amino acid and derivatives	74800	73900	81700	132000	151000	125000	60700	53400	55700	62800	69200	65300
pme1292	167.1	123	2.12	168.04	[M-H]-	C00544	Homogentisic acid	Organic acids and derivatives	293000	281000	295000	335000	475000	533000	223000	225000	317000	124000	103000	152000
pme1294	283	151	1.75	284.08	[M-H]-	C01762	Xanthosine	Nucleotide and derivates	1150000	1120000	1240000	1100000	1070000	978000	645000	591000	669000	1800000	1650000	1560000
pme1310	235.1	190	1.98	236.08	[M-H]-	C02700	N'-Formylkynurenine	Amino acid and derivatives	15300	13600	16100	9	9	9	9	9	9	73800	66100	48200
pme1322	215.1	173	1.14	216.12	[M-H]-	-	Nα-Acetyl-L-arginine	Amino acid and derivatives	425000	548000	422000	1020000	960000	952000	692000	770000	589000	169000	189000	198000
pme1368	128	82	1.16	129.08	[M-H]-	C00408	L-Pipecolic acid	Amino acid and derivatives	73800	58500	78900	23200	32500	37400	43400	58300	68700	109000	141000	114000
pme1373	306	110	1.17	307.06	[M-H]-	C00239	2'-Deoxycytidine-5'-monophosphate	Nucleotide and derivates	30800	23300	12100	22000	12100	28700	17700	9	9	6580	5520	9920
pme1383	170.1	134.1	1.16	169.07	[M+H]+	C00314	Pyridoxine	Vitamins and derivatives	704000	711000	725000	521000	431000	349000	768000	549000	807000	647000	800000	744000
pme1398	465.1	303	2.26	465.1	Protonated	C12138	Delphinidin 3-O-glucoside (Mirtillin)	Anthocyanins	3790000	3370000	2040000	940000	588000	1170000	1200000	514000	557000	6210000	11200000	8340000
pme1399	355.2	178.5	8.4	354.15	[M+H]+	C16417	Xanthohumol	Flavanone	15500	35000	21000	9	25200	24900	11500	13100	29300	70900	64700	20400
pme1408	145.1	109	0.76	146.07	[M-H]-	C00064	L-Glutamine	Amino acid and derivatives	8110000	8500000	8640000	1200000	2070000	1470000	8120000	7010000	7800000	14100000	17500000	14600000
pme1417	161.1	144	2.74	160.1	[M+H]+	C00398	L-Tryptamine	Alkaloids	31900000	31900000	31700000	22400000	21400000	22000000	27200000	22800000	21700000	54600000	43400000	42700000
pme1419	164	104	1.77	163	[M+H]+	-	L-Methionine methyl ester	Amino acid and derivatives	235000	197000	187000	177000	180000	160000	188000	9	155000	118000	167000	187000
pme1434	371.1	209	2.58	372.14	[M-H]-	C01533	Syringin	Phenylpropanoids	83700	71100	87200	120000	151000	123000	9	9	9	66900	42800	55200
pme1439	165	119	3.88	164.05	[M+H]+	C00811	p-Coumaric acid	Phenylpropanoids	114000	113000	108000	77100	89200	90200	216000	96500	124000	104000	121000	49100
pme1474	298	136	2.9	297.09	[M+H]+	C00170	5'-Deoxy-5'-(methylthio)adenosine	Nucleotide and derivates	1700000	1680000	1770000	1120000	809000	765000	1740000	1690000	1940000	2120000	2010000	2680000
pme1478	317	151	4.7	318.04	[M-H]-	C10107	Myricetin	Flavonol	21800	22800	28700	9	9	7840	11500	14800	16100	38200	22600	39000
pme1486	457.2	169	3.33	458.09	[M-H]-	C09731	Epigallate catechin gallate (EGCG)	Polyphenol	181000	162000	200000	238000	182000	141000	223000	596000	171000	240000	186000	219000
pme1502	315.1	300	7.23	314.08	[M+H]+	-	Kumatakenin	Flavonol	201000	199000	212000	134000	164000	189000	169000	219000	164000	150000	244000	176000
pme1514	305	125	2.76	306	[M-H]-	C12136	Epigallocatechin (EGC)	Polyphenol	615000	572000	533000	266000	305000	477000	378000	396000	566000	823000	953000	815000
pme1518	403.1	373	7.06	402.13	[M+H]+	C10112	Nobiletin	Flavone	199000	241000	200000	205000	199000	176000	208000	167000	217000	198000	176000	230000
pme1535	305	125	2.28	306.07	[M-H]-	C12127	(+)-Gallocatechin (GC)	Polyphenol	643000	573000	568000	321000	286000	491000	319000	426000	565000	822000	958000	742000
pme1539	623.2	314	3.66	624.17	[M-H]-	-	Isorhamnetin 3-O-neohesperidoside	Flavonol	244000	237000	271000	162000	153000	144000	216000	195000	182000	397000	406000	445000
pme1550	373.1	343	7.54	372.12	[M+H]+	C10190	Tangeretin	Flavone	227000	242000	230000	207000	231000	220000	226000	213000	211000	201000	186000	234000
pme1551	463.1	316	3.63	464.1	[M-H]-	C10108	Myricetin 3-O-rhamnoside (Myricitrin)	Flavonol	39600	44000	40700	34400	34700	24000	46000	51500	26400	41000	60400	54000
pme1562	441.3	169	3.89	442.3	[M-H]-	-	Epicatechin gallate (ECG)	Polyphenol	68400	66300	65900	61100	80700	68700	90600	202000	70700	84900	87100	68300
pme1583	289.1	153	5.05	288.06	[M+H]+	C05631	Eriodictyol	Flavanone	61500	71300	68600	45800	33900	51500	71300	60500	79400	101000	103000	82600
pme1587	417.1	255	3.36	416.11	[M+H]+	C10216	Daidzein 7-O-glucoside (Daidzin)	Isoflavone	101000	124000	133000	69900	102000	90100	105000	61300	70600	757000	107000	265000
pme1588	315.1	151	5.85	316.06	[M-H]-	C10084	Isorhamnetin	Flavonol	7100	8470	8970	9	9	9	9900	13400	5910	9	9	9
pme1598	463.1	301	3.85	464.13	[M-H]-	-	Hesperetin 5-O-glucoside	Flavanone	46100	54400	70700	35700	36600	33100	32900	35200	35000	49100	39000	47800
pme1600	303.1	167	6.28	302.08	[M+H]+	-	7-O-Methyleriodictyol	Flavanone	89900	92800	105000	21400	27300	16900	23400	40000	28400	252000	260000	214000
pme1605	593.2	285	3.76	594.16	[M-H]-	-	Kaempferol 3-O-robinobioside (Biorobin)	Flavonol	2290000	2300000	2330000	1410000	1390000	1620000	1760000	1630000	1360000	3830000	2860000	3370000
pme1611	433.1	313	3.75	434.12	[M-H]-	-	Isohemiphloin	Flavone	970000	1080000	1050000	949000	846000	731000	818000	604000	745000	1700000	1400000	1450000
pme1622	447.1	285	3.93	448.1	[M-H]-	C12249	Kaempferol 3-O-glucoside (Astragalin)	Flavonol	158000	127000	154000	67200	50600	48500	76800	66300	80200	465000	295000	225000
pme1635	533.3	371	4.85	534.21	[M-H]-	C16915	Arctiin	Phenylpropanoids	48100	41200	43800	18700	137000	11300	18100	8520	11300	21300	17400	50200
pme1637	179.1	146	3.88	180.08	[M-H]-	C00590	Coniferyl alcohol	Phenylpropanoids	25900	20200	26600	114000	39000	17400	9	9	9	9	9	9
pme1638	369.1	193	11.9	370.11	[M-H]-	-	sesamolin	Phenylpropanoids	3200000	3110000	3130000	2840000	2760000	2870000	2510000	2600000	2680000	2120000	2270000	2400000
pme1643	355.1	340	6.59	356.13	[M-H]-	-	(+)-piperitol	Terpene	3820	4170	4670	6170	8550	10100	9	9	9	9	9	9
pme1665	593.2	311	3.36	594.16	[M-H]-	C08064	Isovitexin 7-O-glucoside (Saponarin)	Flavonoid	15200	11900	16900	12500	17600	20100	15000	24200	11700	11700	13600	6070
pme1682	99.1	81	5.68	98.07	[M+H]+	C08497	trans-2-Hexenal	Others	1220000	1290000	1150000	1350000	1300000	1380000	635000	1470000	1440000	958000	1460000	1400000
pme1684	179.1	133	0.86	178.05	[M+H]+	C00198	"D-(+)-Glucono-1,5-lactone"	Carbohydrates	85400	91800	75600	87100	94500	101000	123000	113000	105000	96100	135000	120000
pme1691	147.1	87.2	0.85	146.12	[M+H]+	C08201	Acetylcholine	Alkaloids	2480000	1570000	2160000	1680000	2270000	1630000	2620000	1680000	3530000	1890000	2150000	2220000
pme1692	347	135	1.16	348.05	[M-H]-	C00130	Inosine 5'-monophosphate	Nucleotide and derivates	56800	61100	53100	94000	103000	94700	53200	33300	35400	33300	37000	35500
pme1695	223.1	193	4.06	224.07	[M-H]-	C00482	Sinapic acid	Phenylpropanoids	1670000	1690000	1780000	3100000	3430000	3660000	790000	922000	766000	523000	510000	556000
pme1711	117.1	59	2.03	118.06	[M-H]-	-	3-Hydroxy-3-methyl butyric acid	Organic acids and derivatives	6120000	6440000	6270000	5750000	6700000	6470000	8680000	9210000	7950000	2260000	2420000	2570000
pme1712	275	257	0.79	276.13	[M-H]-	C00449	L-Saccharopine	Amino acid and derivatives	108000	96500	97500	65700	51000	83400	234000	306000	163000	369000	368000	445000
pme1730	117	59	0.74	118.03	[M-H]-	-	D-Erythronolactone	Organic acids and derivatives	371000	419000	462000	571000	641000	727000	162000	171000	215000	76000	54300	61800
pme1738	138.1	95	0.8	137.07	[M+H]+	C02918	3-Carbamyl-1-methylpyridinium (1-Methylnicotinamide)	Alkaloids	240000	166000	188000	355000	255000	349000	386000	364000	377000	295000	324000	297000
pme1773	595	287	2.7	595	Protonated	C08620	Cyanidin 3-O-rutinoside (Keracyanin)	Anthocyanins	2540000	2220000	2230000	1030000	814000	1290000	1370000	853000	1470000	2800000	1930000	2730000
pme1777	611	287	2.08	611	Protonated	C08639	"Cyanidin 3,5-O-diglucoside (Cyanin)"	Anthocyanins	660000	595000	552000	264000	256000	512000	624000	379000	424000	734000	527000	655000
pme1786	655.2	331.1	2.61	655.2	Protonated	C08718	"Malvidin 3,5-diglucoside (Malvin)"	Anthocyanins	226000	250000	306000	269000	235000	219000	331000	204000	214000	362000	286000	297000
pme1814	153	108	2.5	154.03	[M-H]-	C00628	"2,5-dihydroxybenzoic acid (Gentisic acid)"	Organic acids and derivatives	84600	87700	43400	47100	45600	46400	34000	28300	39100	66900	46100	46500
pme1824	153.1	109	2.48	154.03	[M-H]-	C00230	Protocatechuic acid	Polyphenol	285000	237000	206000	260000	265000	157000	117000	143000	108000	306000	208000	232000
pme1830	117	73	1.35	118.03	[M-H]-	C00042	Succinic acid	Organic acids and derivatives	33800000	34600000	35200000	35200000	40900000	39000000	38000000	38900000	33400000	17900000	21600000	19300000
pme1846	179	71	0.77	180.06	[M-H]-	C00031	D(+)-Glucose	Carbohydrates	3900000	5000000	2820000	5300000	3040000	6400000	2720000	2810000	2660000	581000	623000	731000
pme1852	132.1	90	0.81	131.07	[M+H]+	C00300	Creatine	Organic acids and derivatives	273000	321000	298000	368000	481000	508000	326000	518000	450000	292000	258000	258000
pme1894	183	83	0.76	182.08	[M+H]+	C00794	D-Sorbitol	Alcohols	5560000	5420000	5030000	5560000	5050000	5850000	4800000	6150000	5550000	4070000	4170000	4400000
pme1936	114.1	86	0.62	113.06	[M+H]+	C00791	Creatinine	Organic acids and derivatives	2620000	2390000	2540000	2470000	2230000	2090000	2490000	2540000	2530000	2570000	2520000	2520000
pme1944	183.1	69	0.8	182.08	[M+H]+	C00392	D-Mannitol	Alcohols	500000	381000	418000	194000	296000	426000	1160000	616000	934000	673000	767000	588000
pme1952	377	243	3.26	376.14	[M+H]+	C00255	Riboflavin	Vitamins and derivatives	1640000	1610000	1450000	1880000	1410000	1460000	1710000	1140000	1390000	965000	1140000	1120000
pme1977	173.1	111	3.87	174.09	[M-H]-	C08278	Suberic acid	Organic acids and derivatives	185000	196000	217000	197000	191000	148000	211000	251000	277000	181000	224000	254000
pme1987	88	71	0.78	89.05	[M-H]-	C00041	L-Alanine	Amino acid and derivatives	9380	10100	4180	9	8110	9	10000	14000	11500	20100	15500	17800
pme2009	149	87	1.03	150.02	[M-H]-	-	L-(+)-Tartaric acid	Organic acids and derivatives	93700	83600	77200	115000	118000	71100	104000	133000	131000	142000	145000	145000
pme2019	149	59	0.81	150.05	[M-H]-	-	DL-Arabinose	Carbohydrates	1920000	2230000	1910000	1510000	1540000	1290000	1760000	2330000	1360000	1410000	1370000	1600000
pme2024	177	160	1.63	176.1	[M+H]+	C00780	serotonin	Alkaloids	53100000	49200000	45200000	41800000	36200000	39900000	40000000	24300000	35400000	55000000	56900000	54500000
pme2033	133	71	0.85	134.02	[M-H]-	C00497	L(-)-Malic acid	Organic acids and derivatives	6430000	6020000	5270000	5790000	6390000	6070000	4780000	4800000	4760000	3300000	3120000	4040000
pme2036	191	85	0.92	192.06	[M-H]-	C00296	Quinic acid	Organic acids and derivatives	8820000	8930000	8860000	8100000	8810000	8520000	6710000	7540000	7910000	4920000	4910000	5390000
pme2046	170	96	0.79	169.18	[M+H]+	-	3-N-Methyl-L-histidine	Amino acid and derivatives	315000	434000	449000	255000	161000	180000	477000	306000	414000	331000	374000	346000
pme2049	103	57	1.56	104.05	[M-H]-	C05984	2-Hydroxybutanoic acid	Organic acids and derivatives	267000	297000	342000	487000	298000	454000	255000	254000	239000	193000	178000	212000
pme2050	191	111	0.86	192.03	[M-H]-	C00158	Citric acid	Organic acids and derivatives	9250000	9970000	10300000	9900000	10300000	8950000	9060000	9410000	9360000	5970000	5980000	6770000
pme2054	205.1	146	2.4	204.09	[M+H]+	C00078	L-Tryptophan	Amino acid and derivatives	1020000	1040000	1060000	1700000	1190000	1550000	1070000	1110000	640000	263000	268000	272000
pme2108	163	104	0.68	162.11	[M+H]+	C00318	L-Carnitine	Alkaloids	127000	101000	114000	166000	151000	170000	72300	59500	145000	46400	54400	69800
pme2111	175	87	0.85	176.12	[M-H]-	C00072	L-ascorbate	Vitamins and derivatives	217000	251000	195000	298000	291000	253000	106000	163000	153000	141000	89700	132000
pme2122	112.1	95	0.84	111.08	[M+H]+	C00388	Histamine	Amino acid and derivatives	8070000	9590000	9980000	10700000	9670000	7170000	9420000	8390000	9190000	5510000	6180000	6420000
pme2129	131.1	85	3.58	132.08	[M-H]-	-	(S)-(-)-2-Hydroxyisocaproic acid	Organic acids and derivatives	37900000	39000000	38300000	107000000	99900000	114000000	336000	364000	406000	481000	594000	415000
pme2136	123.1	69	0.81	122.06	[M+H]+	-	DL-threitol	Alcohols	129000	290000	200000	227000	232000	192000	348000	255000	248000	134000	135000	157000
pme2155	181	138	2.23	180	[M+H]+	C07480	Theobromine	Alkaloids	177000	185000	140000	285000	281000	372000	9	9	9	9	35400	42900
pme2165	155	111	1.15	156.02	[M-H]-	C00295	Orotic acid	Vitamins and derivatives	3480000	2990000	3140000	2510000	3200000	2430000	1990000	2270000	2440000	1600000	1800000	1920000
pme2169	115	71	1.19	116.01	[M-H]-	C00122	Fumaric acid	Organic acids and derivatives	17900000	16200000	18100000	19500000	19300000	19400000	15500000	16200000	15900000	11800000	12400000	12300000
pme2237	181.1	101	0.76	182.08	[M-H]-	C01697	Dulcitol	Alcohols	61700	62900	83300	43100	42400	76600	85000	86200	86000	80500	92200	84300
pme2241	129	85	1.62	130.03	[M-H]-	C02226	Citraconic acid	Organic acids and derivatives	10700000	10200000	12400000	16600000	18600000	19400000	5860000	6350000	5610000	5720000	4560000	4180000
pme2246	301	185	3.89	302.01	[M-H]-	C10788	Ellagic acid	Polyphenol	36000	24900	28000	21200	24000	26000	49500	41900	38600	40400	43700	36800
pme2253	177.1	59	0.79	178.05	[M-H]-	C01040	L-Gulonic-γ-lactone	Others	522000	343000	529000	694000	569000	399000	239000	206000	302000	9	26100	28500
pme2256	151.1	71	0.77	152.07	[M-H]-	C01904	D-Arabitol	Alcohols	19900	33800	25700	37400	29600	30800	25800	17600	22300	28500	22100	16700
pme2266	245.1	227	3.37	244.09	[M+H]+	C00120	Biotin	Vitamins and derivatives	239000	170000	143000	351000	331000	275000	125000	9	96800	233000	190000	178000
pme2268	138	94	0.79	137.05	[M+H]+	C01004	Trigonelline	Alkaloids	243000000	225000000	226000000	200000000	143000000	154000000	330000000	291000000	320000000	244000000	291000000	294000000
pme2277	152	108	1.22	153.04	[M-H]-	-	3-Aminosalicylic acid	Organic acids and derivatives	156000	210000	269000	403000	384000	313000	245000	111000	155000	150000	168000	180000
pme2282	364	135	1.16	363.06	[M+H]+	-	Guanosine monophosphate	Nucleotide and derivates	29700	35700	40500	35900	14700	25600	86900	42200	24400	39000	36100	40400
pme2292	89	72	0.64	88.1	[M+H]+	C00134	Putrescine	Phenolamides	2780000	2660000	2590000	4930000	3270000	2650000	1000000	783000	814000	221000	315000	363000
pme2366	122.1	105	2.26	121.09	[M+H]+	C05332	Phenethylamine	Others	1010000	1020000	1080000	362000	365000	396000	1290000	1260000	1420000	661000	718000	873000
pme2380	145	101	1.14	146.02	[M-H]-	-	A-Ketoglutaric acid	Organic acids and derivatives	412000	403000	429000	254000	298000	432000	176000	135000	200000	957000	849000	739000
pme2427	222.1	180	2.61	223.09	[M-H]-	-	N-Acetyl-L-tyrosine	Amino acid and derivatives	26000	23000	23500	9	10400	9	12600	12600	17900	44100	46500	41400
pme2435	163	59	0.76	164.07	[M-H]-	C01019	L-Fucose	Carbohydrates	205000	192000	229000	158000	152000	120000	115000	90000	129000	133000	211000	158000
pme2457	447.3	285.2	3.87	448.1	[M-H]-	-	Luteolin 7-O-glucoside (Cynaroside)	Flavone	191000	182000	191000	71700	68800	46200	106000	102000	90100	636000	387000	357000
pme2482	139.1	92.8	3.03	138.03	[M+H]+	C16700	Protocatechuic aldehyde	Polyphenol	1570000	1610000	1650000	455000	369000	342000	898000	648000	596000	3930000	3240000	3250000
pme2493	579.2	287.1	3.74	578.16	[M+H]+	C16981	"Kaempferol 3,7-dirhamnoside (Kaempferitrin)"	Flavonol	126000	175000	133000	103000	88800	179000	118000	109000	72500	247000	232000	196000
pme2527	133	116	0.78	132.16	[M+H]+	C00077	L(+)-Ornithine	Amino acid and derivatives	110000	98300	104000	196000	146000	124000	49500	47400	33300	9	9	39900
pme2529	163.2	101	0.75	164.07	[M-H]-	C07326	"1,5-Anhydro-D-glucitol"	Alcohols	365000	397000	409000	259000	233000	251000	206000	167000	189000	217000	318000	288000
pme2541	103	57	1.56	104.05	[M-H]-	-	α-Hydroxyisobutyric acid	Organic acids and derivatives	82100	83000	79300	128000	97800	127000	57600	65800	72600	50700	57000	63700
pme2550	173	137	0.77	174.02	[M-H]-	C00417	Cis-Aconitic acid	Organic acids and derivatives	81000	68900	43800	17400	16200	11700	37800	28800	60800	347000	385000	354000
pme2560	176	134	1.27	175.05	[M+H]+	C01042	N-Acetylaspartate	Amino acid and derivatives	569000	403000	581000	473000	407000	322000	754000	332000	627000	561000	736000	772000
pme2569	219	202	1.16	218.09	[M+H]+	C03740	(5-L-Glutamyl)-L-amino acid	Amino acid and derivatives	117000	85500	119000	64800	65500	76900	132000	102000	100000	152000	189000	165000
pme2575	225.2	154	0.72	226.11	[M-H]-	C00386	L-Carnosine	Amino acid and derivatives	47300	66000	65100	54700	53500	50600	42000	37500	37100	19700	17000	21000
pme2594	182.1	138	1.66	183.05	[M-H]-	C00847	4-Pyridoxic acid	Alkaloids	42700	51100	44800	43300	39800	22500	33400	34300	32500	57400	58300	62400
pme2598	167.1	123	2.44	168.04	[M-H]-	-	"3,4-Dihydroxybenzeneacetic acid"	Organic acids and derivatives	270000	315000	286000	322000	461000	577000	222000	262000	260000	125000	146000	157000
pme2601	89	59	1.19	90.03	[M-H]-	C01013	3-Hydroxypropanoic acid	Organic acids and derivatives	123000	190000	108000	161000	141000	196000	149000	125000	169000	98100	73300	98200
pme2603	152	108	2.66	153.04	[M-H]-	C00632	3-Hydroxyanthranilic acid	Organic acids and derivatives	101000	125000	107000	134000	189000	208000	9	50500	26000	9	19500	9
pme2607	192.1	146	3.17	191.06	[M+H]+	C05635	5-Hydroxyindole-3-acetic acid	Indole derivatives	131000	79900	111000	124000	85400	128000	88200	83000	175000	133000	85800	128000
pme2617	166	102	0.76	165.05	[M+H]+	-	Methionine sulfoxide	Amino acid and derivatives	3620000	3620000	3880000	3760000	3440000	3290000	4610000	3680000	4370000	3990000	4220000	4230000
pme2634	118	72	0.85	117.08	[M+H]+	C01826	Dl-Norvaline	Amino acid and derivatives	154000000	151000000	158000000	196000000	168000000	146000000	104000000	95200000	107000000	114000000	114000000	121000000
pme2661	383	323	5.46	384.34	[M-H]-	C05443	Vitamin D3	Vitamins and derivatives	63800	63800	72000	9	9	9	95300	106000	40400	80700	27200	90200
pme2670	121	92	3.72	122.04	[M-H]-	C00633	4-Hydroxybenzaldehyde	Organic acids and derivatives	1070000	1120000	1030000	1840000	2260000	2130000	471000	607000	605000	612000	512000	677000
pme2693	131	114	0.8	130.11	[M+H]+	C02714	N-Acetylputrescine	Phenolamides	192000	163000	196000	256000	328000	252000	244000	247000	265000	180000	250000	192000
pme2698	313.4	166	3.62	312.15	[M+H]+	-	Phe-Phe	Amino acid and derivatives	64400	81800	65300	140000	187000	111000	31000	35500	11100	21100	28800	13200
pme2702	144.1	102	1.62	145.07	[M-H]-	C02946	4-Acetamidobutyric acid	Organic acids and derivatives	40100	33900	34300	26600	25700	38900	15900	14400	9	39700	53800	54600
pme2706	153.2	109	2.42	154.03	[M-H]-	C00196	"2,3-Dihydroxybenzoic acid"	Organic acids and derivatives	267000	284000	275000	244000	319000	348000	179000	225000	124000	369000	237000	291000
pme2709	117.1	71	2.3	118.06	[M-H]-	-	2-Hydroxy-2-methyl butyric acid	Organic acids and derivatives	11300	12100	6830	14900	13100	11800	13200	14200	8160	7790	5940	5960
pme2723	146.1	91	4.54	145.05	[M+H]+	C08493	Indole-3-carboxaldehyde	Indole derivatives	140000	153000	202000	165000	134000	126000	121000	158000	106000	114000	130000	161000
pme2743	194.1	91	3.66	193.07	[M+H]+	C05598	N-Phenylacetylglycine	Amino acid and derivatives	639000	512000	501000	1260000	891000	1110000	9	9	9	9	9	9
pme2755	222	144	0.62	221.09	[M+H]+	C00140	N-Acetyl-D-glucosamine	Carbohydrates	1430000	814000	1550000	1180000	1090000	756000	944000	730000	782000	682000	957000	1660000
pme2758	162	144	0.73	163.13	[M-H]-	C03079	4-Hydroxy-L-glutamic acid	Amino acid and derivatives	58300	87100	53900	91600	64100	66400	47300	38700	53300	36100	52400	49700
pme2761	161	73	0.95	162.02	[M-H]-	C01127	4-Hydroxy-2-oxoglutaric acid	Organic acids and derivatives	1480000	1360000	1440000	977000	1070000	1150000	936000	761000	745000	76900	45800	80500
pme2773	223	134	0.73	222.07	[M+H]+	C02291	L-Cystathionine	Amino acid and derivatives	17400	12700	21000	10300	10700	11400	27200	21000	19800	20700	16600	22900
pme2786	219	160	3.32	218.11	[M+H]+	C00978	N-Acetyl-5-hydroxytryptamine	Alkaloids	693000	836000	716000	318000	371000	482000	542000	420000	432000	633000	317000	270000
pme2827	239	223	6.77	240.25	[M-H]-	C00517	Palmitaldehyde	Lipids	62500000	68200000	76100000	4100000	9940000	3710000	3730000	7570000	14700000	27700000	28900000	16200000
pme2828	140	99	0.63	139.03	[M+H]+	C00870	4-Nitrophenol	Others	29400000	30300000	31900000	37900000	35500000	39200000	34100000	28300000	31400000	21500000	23300000	18800000
pme2830	140	79	0.75	141.02	[M-H]-	-	O-Phosphorylethanolamine	Others	577000	661000	602000	968000	911000	841000	239000	254000	144000	257000	282000	460000
pme2831	130	71.9	0.86	129.1	[M+H]+	C07151	"1,1-Dimethylbiguanide"	Others	200000	367000	143000	316000	811000	567000	172000	656000	485000	409000	329000	380000
pme2836	178.1	160	2.95	177.08	[M+H]+	-	5-Hydroxytryptophol	Indole derivatives	999000	889000	924000	657000	465000	575000	886000	595000	936000	1310000	1410000	733000
pme2846	139	106	0.81	138.04	[M+H]+	-	Nicotinamide-N-oxide	Vitamins and derivatives	33100	27500	36900	28100	20100	20300	10900	30200	47900	20500	28800	16000
pme2884	166	124	0.85	167.04	[M-H]-	-	Guanidinoethyl sulfonate	Organic acids and derivatives	50500	43400	20300	35700	33500	61100	10600	29200	26600	25100	17200	22300
pme2890	269	136	0.85	268.06	[M+H]+	C01817	L-Homocystine	Amino acid and derivatives	271000	350000	340000	575000	627000	401000	46800	53700	58900	77100	71200	69300
pme2898	321.1	303	3.52	320.05	[M+H]+	C02906	Dihydromyricetin	Flavonol	1380000	1240000	1170000	787000	466000	447000	557000	529000	743000	2190000	1860000	1780000
pme2914	161	99	1.59	162.05	[M-H]-	C03761	"3-Hydroxy-3-methylpentane-1,5-dioic acid"	Amino acid and derivatives	1210000	1090000	1230000	386000	538000	419000	1300000	1340000	1220000	2790000	2400000	2410000
pme2949	609.2	301	4.08	610.19	[M-H]-	C09755	Hesperetin 7-rutinoside (Hesperidin)	Flavanone	606000	592000	647000	383000	346000	356000	404000	461000	428000	1060000	1070000	1060000
pme2960	273.1	153	5.57	272.07	[M+H]+	C06561	Naringenin chalcone	Flavanone	412000	442000	420000	91100	77200	86000	287000	263000	411000	1250000	977000	736000
pme2984	593	285	5.09	594.2	[M-H]-	C09830	Isosakuranetin-7-neohesperidoside (Poncirin)	Flavanone	11600	8790	14300	18700	17200	7780	12100	22200	10300	12800	7710	9470
pme2988	149.2	107.1	5.63	148.05	[M+H]+	C02274	"3,4-Dihydrocoumarin"	Phenylpropanoids	149000	97100	169000	47800	9	9	112000	165000	136000	9	72400	246000
pme2993	193.1	133	4.16	192.04	[M+H]+	C01752	Scopoletin (7-Hydroxy-5-methoxycoumarin)	Phenylpropanoids	352000	382000	339000	866000	893000	621000	102000	62600	65200	275000	181000	176000
pme3007	403	159	0.7	404.16	[M-H]-	C00015	Uridine 5’-diphosphate	Nucleotide and derivates	322000	333000	276000	229000	201000	207000	457000	277000	317000	349000	337000	410000
pme3009	175	99	0.63	174.02	[M+H]+	-	trans-Citridic acid	Organic acids and derivatives	688000	983000	733000	363000	555000	460000	1260000	1180000	1200000	1030000	1110000	940000
pme3011	104.1	68.8	0.77	103.06	[M+H]+	C00334	γ-aminobutyric acid	Organic acids and derivatives	3780000	3870000	3700000	2490000	2760000	1870000	4430000	4120000	3970000	4630000	6120000	5490000
pme3013	102	73	0.77	103.06	[M-H]-	C05145	3-Aminoisobutanoic acid	Amino acid and derivatives	3860	5900	5830	9	2610	9	2280	4630	4270	1130	9	9
pme3017	104	58	0.76	103.06	[M+H]+	C03665	2-Aminoisobutyric acid	Amino acid and derivatives	25600000	25900000	26800000	12600000	8420000	8210000	34200000	33300000	23500000	22000000	30200000	31800000
pme3033	104	86	0.76	103.06	[M+H]+	C01026	"N,N-Dimethylglycine"	Amino acid and derivatives	2900000	3040000	2870000	2010000	1690000	1450000	3980000	3760000	3050000	3380000	4780000	4610000
pme3034	131	69	1.94	132.04	[M-H]-	-	ethylmalonate	Organic acids and derivatives	50300	31900	34300	36000	26800	46000	44300	30400	33000	41300	37400	23100
pme3038	130	84	0.85	129.04	[M+H]+	C01879	5-oxoproline	Amino acid and derivatives	294000000	270000000	257000000	216000000	223000000	148000000	309000000	286000000	283000000	305000000	363000000	361000000
pme3069	556.3	371	10.27	555.28	[M+H]+	C05122	Taurocholic acid	Organic acids and derivatives	5090000	6800000	5980000	7780000	8140000	7310000	7580000	8230000	6450000	6860000	6630000	7020000
pme3081	169.1	134	0.77	168.09	[M+H]+	C00534	4-(Aminomethyl)-5-(hydroxymethyl)-2-methylpyridin-3-ol	Alcohols	9220000	9820000	10300000	6530000	7110000	5240000	14200000	12300000	15300000	5010000	7150000	5290000
pme3083	164	120	3.87	165.04	[M-H]-	-	2-(Formylamino)benzoic acid	Organic acids and derivatives	144000	157000	145000	131000	127000	204000	251000	256000	187000	134000	110000	125000
pme3096	118	74	1.34	119.02	[M-H]-	C00872	Aminomalonic acid	Organic acids and derivatives	1210000	1250000	1200000	1240000	1390000	1300000	1380000	1390000	1230000	676000	722000	696000
pme3104	150	133	1.15	149.07	[M+H]+	C02216	1-Methyladenine	Nucleotide and derivates	2460000	2450000	2240000	2620000	2410000	2150000	3790000	3190000	3550000	1400000	1400000	1600000
pme3123	209	179	3.88	210.09	[M-H]-	C02325	Sinapyl alcohol	Phenylpropanoids	85000	105000	117000	168000	273000	246000	9	9	13000	42400	26800	32900
pme3130	465	303	3.86	464.1	[M+H]+	-	Quercetin 4'-O-glucoside (Spiraeoside)	Flavonol	2160000	2180000	2390000	1270000	1050000	914000	1370000	662000	1110000	4040000	3260000	3090000
pme3154	147.1	59	1.22	148.07	[M-H]-	-	(Rs)-Mevalonic acid	Organic acids and derivatives	709000	551000	740000	689000	704000	643000	566000	451000	419000	421000	321000	350000
pme3160	259	97	0.71	260.03	[M-H]-	C00092	D-Glucose 6-phosphate	Carbohydrates	10500000	10700000	10400000	10300000	10500000	13100000	9830000	8270000	9690000	6600000	6590000	5800000
pme3163	289	97	1.07	290.04	[M-H]-	-	D-Sedoheptuiose 7-phosphate	Carbohydrates	203000	138000	127000	121000	92900	197000	90800	130000	103000	156000	95400	103000
pme3179	179	76	0.86	178.04	[M+H]+	C01419	CYS-GLY	Amino acid and derivatives	91200	76600	82600	13300	22500	53600	110000	154000	320000	19500	25100	44700
pme3184	332	136	1.17	331.07	[M+H]+	C00360	2'-Deoxyadenosine-5'-monophosphate	Nucleotide and derivates	666000	898000	915000	499000	540000	679000	1330000	1020000	1110000	568000	554000	536000
pme3188	323	211	1.18	324.04	[M-H]-	C00105	Uridine 5'-monophosphate	Nucleotide and derivates	2020000	2210000	2540000	2370000	2320000	2180000	1050000	1200000	1150000	1630000	1900000	1480000
pme3194	118	58	1.02	117.04	[M+H]+	-	N-acetylglycine	Amino acid and derivatives	2280000	1200000	1680000	1870000	1290000	1210000	3400000	2610000	2050000	2070000	1440000	2000000
pme3198	153	109	2.75	154.03	[M-H]-	-	"2,4-Dihydroxybenzoic acid"	Organic acids and derivatives	269000	227000	306000	297000	283000	246000	156000	203000	142000	379000	312000	242000
pme3200	74	57	0.71	73.1	[M+H]+	-	1-methylguanidine	Nucleotide and derivates	35700	39800	44100	69300	74600	56300	40300	96500	49100	46200	42200	36800
pme3207	141	59	0.69	142.03	[M-H]-	-	"trans,trans-Muconic acid"	Organic acids and derivatives	973000	853000	867000	96600	89400	86000	301000	300000	230000	211000	212000	276000
pme3208	445	283	3.54	446.12	[M-H]-	C16195	Glycitin	Isoflavone	35700	33000	37100	147000	53100	36400	9	9	9920	9	9	9
pme3210	433	271	4.01	432.11	[M+H]+	C09126	Genistein 7-O-Glucoside (Genistin)	Isoflavone	215000	282000	199000	265000	303000	229000	245000	178000	179000	674000	275000	318000
pme3211	463	301	3.86	464.1	[M-H]-	C05623	Quercetin 3-O-glucoside (Isotrifoliin)	Flavonol	57800	43500	48100	39100	21200	32300	33000	34100	31800	68300	58600	29500
pme3246	341	179	2.72	342.13	[M-H]-	C00761	Coniferin	Phenylpropanoids	16200000	15900000	18100000	9	6760000	8550000	16600000	15500000	17500000	21100000	18800000	21200000
pme3256	611	303	2.37	611	Protonated	C16315	Delphinidin 3-O-rutinoside (Tulipanin)	Anthocyanins	128000	91100	65700	9	9	9	21200	9	9	395000	260000	254000
pme3263	269	225	4.43	270.05	[M-H]-	C02495	2'-Hydroxydaidzein	Isoflavone	28100	39200	22100	13600	32400	27200	23200	48200	31400	31100	30900	30200
pme3267	447	285	3.86	448.1	[M-H]-	C12626	Kaempferol 3-O-galactoside (Trifolin)	Flavonol	121000	147000	134000	42300	34900	25100	91200	57500	75200	414000	224000	160000
pme3279	287	153	4.89	286.05	[M+H]+	C12134	2'-Hydroxygenistein	Isoflavone	110000	98000	128000	138000	232000	179000	74900	202000	186000	76200	199000	172000
pme3285	275	139	3.4	274.08	[M+H]+	C09320	"Afzelechin (3,5,7,4'-Tetrahydroxyflavan)"	Flavanone	770000	725000	928000	566000	342000	492000	433000	337000	969000	1210000	774000	886000
pme3296	431	285	4.48	432.11	[M-H]-	C16911	Kaempferol 3-O-rhamnoside (Kaempferin)	Flavonol	53300	51300	61400	21300	312000	6960	27200	15600	8470	18600	23500	20000
pme3309	145.1	101	2.58	146.06	[M-H]-	-	2-Methylglutaric acid	Organic acids and derivatives	847000	923000	941000	942000	1070000	711000	463000	519000	481000	1090000	1120000	1010000
pme3313	259	97	0.83	260.03	[M-H]-	C00085	D-Fructose 6-phosphate	Carbohydrates	3400000	3600000	3400000	3290000	3720000	4340000	3400000	2570000	3070000	2190000	2140000	1930000
pme3333	153.1	136.1	1.51	152.06	[M+H]+	-	"1,4-dihydro-1-Methyl-4-oxo-3-pyridinecarboxamide"	Alkaloids	936000	1190000	1230000	1320000	1320000	1200000	1320000	1010000	827000	1300000	930000	1420000
pme3336	382	206	2.06	383.11	[M-H]-	-	N6-Succinyl Adenosine	Nucleotide and derivates	2240000	2320000	2270000	2310000	2600000	2410000	2700000	2270000	2310000	1990000	1990000	1790000
pme3346	131.1	85	2.76	132.08	[M-H]-	-	5-hydroxyhexanoic acid	Organic acids and derivatives	2010000	2040000	1930000	1320000	1420000	1750000	1070000	1220000	1350000	3210000	2920000	3160000
pme3351	144.1	126	0.84	145.07	[M-H]-	C04076	Allysine(6-Oxo DL-Norleucine)	Amino acid and derivatives	952000	936000	843000	1050000	1360000	841000	1050000	1170000	1270000	1190000	1440000	1720000
pme3367	161	105	5.96	160.05	[M+H]+	-	6-MethylCoumarin	Phenylpropanoids	374000	420000	309000	1010000	833000	984000	9	9	9	9	9	131000
pme3369	315	165	6.43	316.06	[M-H]-	C10176	Rhamnetin (7-O-methxyl quercetin)	Flavonol	14500	14900	15100	9	9	9	22600	24500	7860	9	9	5550
pme3382	160	98	1.16	161.07	[M-H]-	-	N-Acetylthreonine	Amino acid and derivatives	42000	32000	41500	42500	38000	44200	47700	47300	46000	75800	68500	65500
pme3388	189	144	0.75	188.13	[M+H]+	C01924	H-HomoArg-OH	Amino acid and derivatives	1040000	1070000	1110000	1180000	1800000	1030000	2610000	1660000	9	1400000	1430000	1850000
pme3396	289	215	3.65	288.06	[M+H]+	C01378	Fustin	Flavonol	468000	363000	539000	283000	237000	213000	284000	212000	311000	620000	420000	353000
pme3425	209.2	149.1	3.56	208.04	[M+H]+	C09265	"6-Methoxy-7,8-DihydroxyCoumarin"	Phenylpropanoids	1140000	1240000	1380000	1120000	893000	1060000	1700000	1090000	1600000	1410000	1280000	1190000
pme3428	339.1	177	2.72	340.08	[M-H]-	C09264	"Esculin (6,7-Dihydroxycoumarin-6-glucoside)"	Phenylpropanoids	47700	62900	41300	32600	26400	27900	28500	48500	28300	116000	9	40300
pme3434	211.1	137	4.62	212.07	[M-H]-	-	"Eudesmic acid (3,4,5-trimethoxybenzoic acid)"	Organic acids and derivatives	64400	62800	56700	119000	156000	159000	9	9	9	9	9	9
pme3443	207.1	192	4.61	208.07	[M-H]-	-	Sinapinaldehyde	Phenylpropanoids	725000	774000	767000	1870000	1790000	1730000	84100	73100	88100	201000	170000	167000
pme3453	147.1	129	4.42	148.05	[M-H]-	-	p-Coumaraldehyde	Phenylpropanoids	15100	15600	16800	45500	14900	17900	9	9	9	9	9	9
pme3468	739.2	593	3.35	740.22	[M-H]-	C10178	Kaempferol-3-O-robinoside-7-O-rhamnoside (Robinin)	Flavonol	9230	8480	12300	122000	3450	5390	9780	9	6870	26600	18200	9430
pme3475	273.1	153	5.59	272.07	[M+H]+	C09614	Butin	Flavone	422000	431000	412000	69200	67500	70600	253000	262000	438000	1220000	931000	744000
pme3478	277.1	146	2.84	278.13	[M-H]-	C00831	Pantetheine	Vitamins and derivatives	225000	253000	230000	325000	336000	345000	285000	286000	348000	554000	608000	664000
pme3484	479.1	315.5	3.53	480.09	[M-H]-	-	Myricetin 3-O-galactoside	Flavonol	35400	21600	23900	24400	23200	40100	51000	25800	38100	37900	22600	21600
pme3509	255.1	136.8	4.75	254.06	[M+H]+	C12123	"7,4'-Dihydroxyflavone"	Flavone	39500	51600	36700	56800	44500	30600	55600	37900	44500	45200	69000	77500
pme3511	287.1	243	1.21	288.06	[M-H]-	-	Orotidine	Others	76400	47000	79100	61400	75400	55900	36200	35800	40100	47700	33400	35800
pme3514	301	151	5.11	302.04	[M-H]-	C10105	Morin	Flavonol	66000	49900	30500	10900	13800	15500	13200	21100	19500	22600	15300	11900
pme3553	187	131	5.94	186.03	[M+H]+	C09305	Psoralen	Phenylpropanoids	23900	27300	46400	46600	50900	34000	9	40200	63800	9	46600	37500
pme3705	193.1	73	0.72	194.04	[M-H]-	C00191	D-glucoronic acid	Others	1990000	2010000	1840000	2040000	1670000	1700000	741000	535000	639000	999000	1500000	1210000
pme3719	165.1	75	0.75	166.05	[M-H]-	-	D-Xylonic acid	Organic acids and derivatives	10600000	10600000	10800000	8660000	9910000	8250000	8970000	8770000	9020000	13700000	12000000	13100000
pme3732	244.1	112	0.83	243.09	[M+H]+	C00475	Cytidine	Nucleotide and derivates	490000	496000	412000	821000	797000	732000	92000	52200	106000	112000	169000	137000
pme3825	196.2	135	1.16	197.07	[M-H]-	C00355	"3,4-Dihydroxy-DL-phenylalanine"	Amino acid and derivatives	31400	29000	38600	23900	19600	27200	25900	39700	31700	14600	14900	23500
pme3835	344.2	150	1.33	345.05	[M-H]-	C00942	"Guanosine 3',5'-cyclic monophosphate"	Nucleotide and derivates	46900	83200	78300	125000	137000	163000	9	12700	11100	27100	31900	25100
pme3840	204.1	102	0.76	205.13	[M-H]-	C05944	Pantothenol	Alcohols	13800	15100	8470	5930	13000	9970	5020	7570	9	12600	11900	9370
pme3961	252	136	1.88	251.1	[M+H]+	C00559	Deoxyadenosine	Nucleotide and derivates	71000	65700	63000	60800	47100	48600	67600	9	9	116000	78800	9
pme3965	310	178	2.18	311.12	[M-H]-	-	2-(dimethylamino)guanosine	Nucleotide and derivates	170000	172000	183000	138000	140000	168000	185000	161000	150000	158000	157000	164000
pme3968	166	103	1.15	165.07	[M+H]+	C02242	7-methylguanine	Nucleotide and derivates	1310000	1410000	1150000	652000	787000	738000	814000	670000	738000	1230000	1030000	890000
pme3970	243	153	1.21	244.07	[M-H]-	C02067	β-Pseudouridine	Nucleotide and derivates	183000	145000	167000	374000	270000	304000	107000	119000	102000	15800	52900	71700
pme3983	269.1	137	1.49	268.08	[M+H]+	-	Hypoxanthine-9-β-D-arabinofuranoside	Nucleotide and derivates	110000	102000	112000	192000	228000	205000	105000	127000	113000	109000	83000	113000
pmf0005	579.2	271	4.05	580.53	[M-H]-	C09793	Narirutin	Flavone	347000	382000	397000	303000	304000	279000	286000	242000	297000	466000	473000	450000
pmf0016	150.1	61	0.87	149.05	[M+H]+	-	DL-Methionine	Amino acid and derivatives	1800000	2110000	2000000	975000	1800000	907000	2180000	2020000	1340000	1460000	1770000	1660000
pmf0017	136	118.1	0.87	135.04	[M+H]+	C05330	DL-Homocysteine	Amino acid and derivatives	226000	332000	201000	186000	300000	226000	291000	167000	110000	79200	50000	101000
pmf0018	102.1	56	0.76	101.05	[M+H]+	-	1-Aminocyclopropanecarboxylic acid	Amino acid and derivatives	2120000	2890000	3230000	2030000	2360000	1390000	1840000	1310000	2160000	3700000	3500000	3870000
pmf0027	449.1	286.8	2.68	448.1	[M]+	C08647	Cyanidin 3-O-galactoside	Anthocyanins	7970000	7150000	6150000	2540000	1520000	2020000	2260000	1650000	2330000	12700000	15900000	14100000
pmf0032	341.1	179	0.75	342.12	[M-H]-	-	Galactinol	Carbohydrates	12900000	11700000	14900000	16500000	14500000	14700000	7360000	5320000	5840000	1050000	1090000	1090000
pmf0035	259	97	0.78	260.03	[M-H]-	-	Glucose-1-phosphate	Carbohydrates	9670000	10800000	10300000	10300000	10400000	15300000	9960000	9330000	9850000	6830000	6230000	6290000
pmf0052	249.2	150	2.05	248.19	[M+H]+	-	Sophoridine	Alkaloids	58700	43400	40200	54900	55900	46900	72600	9	48200	52200	48300	57200
pmf0057	271.1	151	5.66	272.07	[M-H]-	C06561	"4,2',4',6'-Tetrahydroxychalcone "	Flavone	86300	78400	88300	16500	10700	11500	56800	55200	92100	333000	226000	179000
pmf0058	271	150.9	5.66	272.07	[M-H]-	C00509	"4',5,7-Trihydroxyflavanone"	Flavanone	89300	97900	94300	19500	12600	17000	61500	59700	96800	316000	236000	190000
pmf0068	183.2	147	0.78	182.08	[M+H]+	C00392	Mannitol	Alcohols	128000	97600	110000	77700	54800	73800	305000	305000	252000	92900	175000	157000
pmf0070	415.4	119.2	7.75	414.39	[M+H]+	C01753	β-Sitosterol	Sterides	2790000	3120000	3450000	2180000	2780000	1700000	8270000	1680000	2900000	1520000	1840000	4200000
pmf0073	399.4	235	12.28	400.37	[M-H]-	C01789	Campesterol	Sterides	402000	367000	364000	314000	292000	332000	278000	295000	298000	257000	273000	257000
pmf0079	457.4	375.1	12.32	458.38	[M-H]-	C08980	Soyasapogenol B	Sterides	284000	285000	282000	264000	250000	269000	247000	258000	255000	262000	248000	249000
pmf0085	427.4	345	12.26	426.39	[M+H]+	C01902	Cycloartenol	Sterides	86700	97400	73300	60900	71100	81800	63000	51800	46700	66600	66300	66500
pmf0091	427.4	345	12.26	426.39	[M+H]+	-	"2,3-Oxidosqualene"	Sterides	90100	81900	98300	73200	65100	96900	51700	73500	43100	63800	53200	66500
pmf0096	88.9	70.9	1.13	90.03	[M-H]-	C00209	Oxalic acid	Organic acids and derivatives	415000	428000	445000	554000	495000	397000	384000	360000	451000	251000	321000	296000
pmf0104	181	117	3.32	180.04	[M+H]+	C01481	Caffeic acid	Phenylpropanoids	215000	211000	170000	37400	61500	90000	205000	92000	171000	470000	414000	442000
pmf0118	565.1	322.9	0.8	610.02	[M-2Na+H]-	-	Uridine 5'-diphosphoglucose disodium salt	Nucleotide and derivates	11600000	12700000	11300000	7820000	8760000	8470000	17800000	14700000	17500000	13500000	11900000	12100000
pmf0122	175.1	157	5.4	174.16	[M+H]+	-	"1,10-decanediol"	Alcohols	137000	139000	138000	223000	200000	147000	107000	177000	208000	137000	137000	165000
pmf0123	209.1	177.3	5.75	208.07	[M+H]+	-	Methyl ferulate	Phenylpropanoids	3560000	3640000	3610000	12000000	8520000	10900000	9	9	9	9	9	9
pmf0131	353.1	135.1	2.92	354.1	[M-H]-	-	Cryptochlorogenic acid	Organic acids and derivatives	76800	68200	65100	9	17000	9	24600	26400	9	47900	57000	50900
pmf0136	565.1	322.9	0.8	566.06	[M-H]-	C00029	UDP-α-D-glucose	Nucleotide and derivates	14000000	12700000	11100000	9200000	9020000	9440000	19600000	15900000	16500000	14900000	13100000	13000000
pmf0138	179	59	0.87	180.063	[M-H]-	C00159	D-(+)-Mannose	Carbohydrates	11700000	5680000	9100000	19100000	10600000	11300000	5960000	8400000	6380000	879000	899000	1020000
pmf0139	179	59	0.67	180.06	[M-H]-	C00124	D-(+)-Galactose	Carbohydrates	8190000	9400000	8090000	12800000	11300000	13700000	5440000	5800000	4840000	982000	987000	1030000
pmf0141	121	76.9	4.58	122.07	[M-H]-	C05853	2-Phenylethanol	Others	1810000	1830000	1910000	982000	3380000	1030000	777000	1600000	1290000	1310000	859000	1980000
pmf0152	291	247	3.02	292.02	[M-H]-	-	Brevifolincarboxylic acid	Phenylpropanoids	127000	141000	71300	113000	113000	90900	161000	174000	116000	154000	132000	193000
pmf0171	201	142.9	6.35	200.26	[M+H]+	C21721	Camalexin	Alkaloids	11400	17400	10500	10600	17700	9690	15000	13500	12400	16000	20600	14400
pmf0174	157.2	157.2	7.72	158.28	[M-H]-	C01633	1-Decanol	Alcohols	26800000	26800000	26000000	17100000	33700000	21100000	8900000	39500000	27800000	12100000	29700000	39000000
pmf0175	157.2	157.2	7.84	158.28	[M-H]-	-	2-Decanol	Alcohols	27400000	26800000	27000000	17700000	34100000	21700000	8890000	40600000	28000000	12500000	30300000	39800000
pmf0178	207.1	135.1	5.47	208.07	[M-H]-	-	Ethyl caffeate	Organic acids and derivatives	146000	147000	144000	9	9	9	661000	527000	209000	47100	95200	283000
pmf0179	623.2	315.1	4.04	624.17	[M-H]-	-	Narcissoside	Flavonoid	2240000	2380000	2120000	1480000	1940000	1520000	856000	1300000	1050000	2750000	2050000	2070000
pmf0204	465.1	303	3.73	464.1	[M+H]+	-	Hyperoside	Flavonoid	3110000	1700000	1790000	1910000	870000	1170000	1270000	1550000	1950000	3170000	1670000	2120000
pmf0208	465.1	303	3.9	464.1	[M+H]+	-	Isoquercitroside	Flavonoid	1280000	2100000	1600000	1370000	992000	1050000	1460000	1020000	1250000	3400000	2450000	3280000
pmf0217	259	78.9	0.79	304.1	[M-2Na+H]-	-	D-Glucose-6-phosphate disodium salt	Others	7780000	8190000	6930000	7650000	8150000	10000000	7610000	6500000	6750000	6080000	5860000	4580000
pmf0218	167	78.8	0.84	233.99	[M-3Na+2H]-	-	Phosphoenolpyruvate trisodium salt	Organic acids and derivatives	150000	192000	147000	60800	76100	90700	205000	113000	185000	235000	246000	169000
pmf0220	259	97	0.8	303.99	[M-2Na+H]-	-	D-Fructose 6-phosphate-disodium salt	Carbohydrates	10400000	11600000	9210000	12000000	11100000	13000000	10000000	7960000	11000000	6950000	7370000	6890000
pmf0230	248.1	129	6.26	247.05	[M+H]+	C18604	Forchlorfenuron	Others	13200	14700	13500	9	9	9	9	9	9	127000	14600	12500
pmf0231	349.9	198	10.08	348.93	[M+H]+	C14322	Chlorpyrifos	Alkaloids	12300	12400	10500	4590	11600	6930	7950	8230	8990	28300	9700	20100
pmf0243	271.1	98.9	12.27	270.11	[M+H]+	-	Benzyl β-D-Glucopyranoside	Others	4270000	4120000	4200000	3760000	3680000	3970000	3930000	3860000	3920000	3650000	3790000	3870000
pmf0245	143	69	1.5	142.03	[M+H]+	C14516	Kojic acid	Organic acids and derivatives	408000	552000	434000	9	328000	200000	135000	9	156000	9	9	9
pmf0253	226.1	148.3	4.22	225.1	[M+H]+	C11263	6-Benzylaminopurine	Nucleotide and derivates	88300	91300	66300	150000	111000	99900	30200	41700	40300	29700	36400	30900
pmf0256	101.1	84.7	1.28	102.1	[M-H]-	-	3-Methyl-1-pentanol	Alcohols	272000	325000	300000	396000	397000	307000	290000	278000	198000	333000	282000	231000
pmf0259	869.5	253.3	8.02	868.48	[M+H]+	C08897	Dioscin	Sterides	2120000	1950000	1590000	1450000	1790000	2850000	1710000	1260000	1390000	1880000	3160000	1660000
pmf0263	254	117	3.67	290.03	[M-H]-	-	Apigeninidin chloride	Anthocyanins	7830	11500	8960	9070	7720	9	9710	7550	12500	25200	31300	20400
pmf0266	179	137.3	4.47	178.03	[M+H]+	C09001	"5,7-Dihydroxychromone"	Flavonoid	91300	60900	56300	41500	52100	60900	72900	9	62800	74500	70500	43000
pmf0268	162	115.9	4.38	161.05	[M+H]+	C19837	Indole-3-carboxylic	Alkaloids	92100	77800	83400	78400	74800	65700	28900	48900	32400	82400	89500	72800
pmf0271	165	146.8	3.86	164.05	[M+H]+	C00811	(E)-p-coumaric acid	Phenylpropanoids	173000	246000	212000	155000	155000	213000	329000	309000	352000	139000	196000	183000
pmf0275	303	121.3	5.13	302.04	[M+H]+	-	Herbacetin	Flavonoid	623000	608000	664000	774000	860000	583000	332000	973000	950000	483000	921000	865000
pmf0280	193	113.1	0.79	194.04	[M-H]-	C00333	D-Galacturonic acid	Organic acids and derivatives	24000000	28600000	26800000	23700000	28100000	20800000	23100000	17800000	21500000	12500000	14400000	14800000
pmf0282	341.1	113	0.73	342.12	[M-H]-	C05402	Melibiose	Carbohydrates	1470000	1960000	1790000	1940000	1580000	1610000	840000	485000	629000	130000	170000	94000
pmf0284	177.1	162	4.65	178.06	[M-H]-	C02666	4-Hydroxy-3-methoxycinnamaldehyde	Phenylpropanoids	60600	58100	63500	244000	95300	92200	9	9	9	10800	9	9
pmf0286	295.3	195.2	8.95	296.31	[M-H]-	C01389	Phytol	Terpene	24600000	24600000	24800000	3060000	3500000	3220000	44800000	45300000	21500000	9590000	18500000	41200000
pmf0290	94	65.9	0.85	95.09	[M-H]-	C02502	2-Hydroxypyridine	Alkaloids	67300	56400	51600	66100	72300	70500	70000	71100	62100	32400	37500	38100
pmf0291	96	68	0.85	95.09	[M+H]+	-	4-Hydroxypyridine	Alkaloids	224000	247000	189000	244000	234000	150000	152000	128000	108000	172000	156000	161000
pmf0292	302.3	109.2	7.49	301.3	[M+H]+	C00836	D-erythro-sphinganine	Amino acid and derivatives	174000	160000	158000	441000	827000	910000	217000	171000	142000	123000	159000	92900
pmf0294	271.3	105	12.24	270.29	[M+H]+	V01924	1-Octadecanol	Lipids	366000	365000	353000	327000	318000	321000	278000	293000	291000	309000	303000	287000
pmf0295	325.1	163	2.83	324.08	[M+H]+	-	Skimmin	Phenylpropanoids	701000	759000	837000	143000	174000	476000	390000	393000	525000	1190000	1630000	1270000
pmf0301	433.1	269.1	4.3	434.12	[M-H]-	-	Engeletin	Flavonoid	110000	92200	106000	79400	90500	66900	89300	73300	77600	171000	134000	130000
pmf0309	1047.5	901.8	5.09	1048.55	[M-H]-	C08907	Protodioscin	Sterides	11700	9570	10000	9230	7120	5420	6610	6730	4970	9	24000	11500
pmf0312	164	148.8	4.5	165.04	[M-H]-	-	Coixol	Alkaloids	171000	185000	181000	273000	205000	294000	9	95300	69500	49700	40400	9
pmf0319	195.1	137	4.27	196.07	[M-H]-	C10664	Acetosyringone	Phenylpropanoids	83100	82800	85100	201000	181000	240000	9	9	9	9	9	9
pmf0324	149.1	80	1.24	148.1	[M+H]+	C06524	Nornicotine	Alkaloids	165000	144000	136000	79800	83300	104000	203000	186000	273000	171000	181000	195000
pmf0325	438	97	1.18	476.98	[M]-	C08405	Glucocheirolin	Terpene	24100	14300	20500	9	9	7150	7240	10600	19800	10400	16400	19000
pmf0327	241.1	198	4.46	242.08	[M-H]-	C01727	lumichrome	Alkaloids	30900	24200	22100	25900	27100	43100	50800	32800	34400	61200	52100	54300
pmf0338	385.2	153	3.37	386.19	[M-H]-	-	Roseoside	Terpene	676000	635000	635000	441000	392000	396000	528000	560000	506000	988000	1120000	867000
pmf0345	275.1	107	3.74	274.08	[M+H]+	C12128	(-)-Epiafzelechin	Polyphenol	15800000	16300000	16500000	9890000	4440000	11900000	9060000	6650000	14000000	33000000	22500000	24700000
pmf0348	187.1	97	4.43	188.14	[M-H]-	-	"2,6-Dimethyl-7-octene-2,3,6-triol"	Alcohols	530000	487000	542000	231000	187000	235000	897000	957000	555000	609000	548000	1070000
pmf0360	449.1	151	3.97	450.12	[M-H]-	C17449	Astilbin	Flavonoid	301000	369000	376000	197000	167000	164000	246000	256000	269000	754000	669000	604000
pmf0369	477.1	315	4.54	478.15	[M-H]-	-	Persicoside	Flavonoid	25500	24300	24300	16800	19900	17700	16200	19800	37500	55600	40000	28300
pmf0375	479.1	317	4.18	478.11	[M+H]+	-	Isorhamnetin 3-O-glucoside	Flavonoid	109000	204000	131000	137000	221000	9	133000	124000	147000	332000	317000	380000
pmf0379	457.1	169	3.44	458.08	[M-H]-	-	Gallocatechin gallate	Polyphenol	135000	115000	151000	161000	140000	132000	201000	740000	202000	204000	226000	191000
pmf0382	343.1	313	6.81	344.09	[M-H]-	C19807	"5,7-Dihydroxy-3',4',5'-trimethoxyflavone"	Flavonoid	4500	5570	4480	9	9	9	3300	3630	9	9	9	2550
pmf0392	315.1	178	7.15	316.09	[M-H]-	-	Persicogenin	Flavonoid	2360	2310	2130	2910	2830	2840	2230	1860	2950	2750	2740	2800
pmf0395	283.3	267.1	10.74	282.26	[M+H]+	C00712	Oleic acid	Lipids	67900000	83000000	104000000	9	9	9	4920000	9	6060000	30300000	35600000	17400000
pmf0396	281.2	105.1	12.24	280.24	[M+H]+	C01595	Linoleic acid	Lipids	93700	91400	91600	76700	75300	78800	73100	73700	77300	67400	70300	71900
pmf0398	313.3	159.2	11.15	312.3	[M+H]+	C06425	Arachidic acid	Lipids	123000	124000	105000	75300	44100	56400	152000	165000	106000	61100	120000	210000
pmf0399	309.3	227.3	10.72	310.29	[M-H]-	C16526	cis-Gondoic acid	Lipids	1390000	1170000	1440000	977000	1060000	886000	1320000	1420000	864000	1110000	985000	1100000
pmf0402	367.4	285.4	10.84	368.37	[M-H]-	C08320	Lignoceric acid	Lipids	34200	34700	24400	35900	43600	48100	61900	36600	28000	47000	45400	60700
pmf0403	290.2	124	3.28	289.17	[M+H]+	C02046	L-Hyoscyamine	Alkaloids	107000	113000	106000	52100	43200	111000	83300	62900	64300	183000	178000	121000
pmf0418	237.2	135	8.29	236.18	[M+H]+	C17493	Curdione	Others	1040000	956000	766000	490000	380000	331000	1040000	861000	1110000	926000	1270000	1170000
pmf0420	149	74.9	4.37	150.07	[M-H]-	C15513	Benzyl acetate	Organic acids and derivatives	476000	488000	510000	180000	485000	41600	54900	134000	225000	294000	268000	293000
pmf0434	389.1	227.1	3.26	390.15	[M-H]-	C01433	Loganin	Terpene	39500	35600	35000	70400	64100	72700	18400	14300	14100	11100	9	9840
pmf0436	164.1	110.1	0.65	163.08	[M+H]+	C16843	1-Deoxynojirimycin	Alkaloids	40900	24700	28600	17500	12500	19100	11800	15600	23200	20200	19900	19500
pmf0441	206.1	147.1	3.84	207.09	[M-H]-	C03519	N-Acetyl-L-phenylalanine	Amino acid and derivatives	1860000	1850000	1900000	928000	1030000	890000	1370000	1330000	1260000	3790000	3400000	3140000
pmf0446	379.1	199	3.26	356.11	[M+H]+	C09782	Gentiopicroside	Terpene	50200	24500	39900	9	9	9	38600	59800	50700	21400	30700	21000
pmf0455	432.3	415	3.4	431.34	[M+H]+	C10830	Peimine	Alkaloids	2510000	2700000	2040000	2230000	2280000	2230000	1590000	1340000	2320000	2190000	1820000	1720000
pmf0458	295.2	277	7.08	294.18	[M+H]+	C10462	6-Gingerol	Polyphenol	2280000	2100000	2090000	9	9	84000	1710000	1790000	753000	143000	323000	1900000
pmf0461	300.1	145.2	2.64	301.14	[M-H]-	C10677	Febrifugine	Alkaloids	15600	19700	17700	18900	19900	14800	25000	19600	26200	15600	15200	15500
pmf0467	405	140.9	2.84	406.15	[M-H]-	C17000	Morroniside	Terpene	181000	175000	138000	52700	57000	79800	187000	212000	221000	161000	183000	187000
pmf0470	132.1	73	0.79	131.06	[M+H]+	C03440	cis-4-Hydroxy-D-proline	Amino acid and derivatives	2360000	2570000	2390000	3200000	2500000	2980000	2590000	4280000	2370000	2480000	1870000	2290000
pmf0474	373.1	123	2.15	374.12	[M-H]-	C11673	Geniposidic acid	Terpene	13000	16900	14500	15500	14000	15700	11200	12400	9420	12000	12100	10500
pmf0484	132.1	86	1.35	131.09	[M+H]+	C01933	alpha-Aminocaproic acid	Amino acid and derivatives	860000000	831000000	870000000	1080000000	1000000000	989000000	631000000	596000000	561000000	315000000	332000000	357000000
pmf0485	503.2	179	0.8	504.17	[M-H]-	C00713	Panose	Carbohydrates	3790000	4020000	2930000	5210000	7060000	9150000	116000	103000	99600	44300	40100	58500
pmf0504	275.2	109	6.52	274.19	[M+H]+	C07254	Nandrolone	Others	160000	219000	198000	9	9	9	193000	258000	63500	24600	59900	248000
pmf0506	191.1	173.4	8.26	190.1	[M+H]+	C16987	Ligustilide	Others	119000	119000	123000	9	42500	67200	48700	91300	132000	284000	179000	211000
pmf0509	153.2	71	12.43	152.12	[M+H]+	C00809	(-)-Camphor	Terpene	3140000	3140000	3110000	2780000	2700000	2820000	3020000	2800000	2930000	2620000	2750000	2700000
pmf0512	87.9	44	0.86	89.01	[M-H]-	C01444	Oxamate	Phenylpropanoids	75500	66600	63300	55600	81400	82500	62500	80900	46600	60000	48800	35700
pmf0514	219.2	111.2	9.4	218.17	[M+H]+	C17090	alpha-Cyperone	Others	136000	121000	125000	30400	53600	63500	36200	71000	83500	185000	254000	182000
pmf0525	271	147	7.92	270.09	[M+H]+	C09269	Imperatorin	Phenylpropanoids	77100	82500	75700	49000	63100	83300	64800	58100	67900	78400	149000	82600
pmf0526	271.1	147.2	8.49	270.09	[M+H]+	C16976	Isoimperatorin	Phenylpropanoids	179000	185000	213000	105000	132000	201000	111000	121000	144000	178000	317000	145000
pmf0527	245.1	159.2	8.3	244.11	[M+H]+	C09280	Osthole	Phenylpropanoids	101000	116000	91700	65300	44400	57000	56700	54700	60300	197000	230000	164000
pmf0528	191.1	148	0.85	190.11	[M+H]+	C10763	Cytisine	Alkaloids	45000	25200	34500	18500	9740	17400	31500	18300	34300	66200	26400	55900
pmf0532	533	371	4.76	534.21	[M-H]-	C17048	Phillyroside	Phenylpropanoids	42500	50100	58800	20000	212000	14400	31200	11800	14900	31500	26600	67800
pmf0534	165.1	123	7.13	164.08	[M+H]+	C09904	Hinokitiol	Others	1890000	2250000	2220000	2090000	2210000	2720000	1470000	2690000	2690000	1320000	2500000	2060000
pmf0547	271.1	197	7.96	270.05	[M+H]+	C10343	Emodin	Quinones	89100	129000	107000	55800	80000	109000	65900	73800	67800	72100	119000	70900
pmf0549	607.2	299	4.14	608.17	[M-H]-	C10039	Diosmin	Flavonoid	37600	32600	28500	19500	25000	24100	28000	12800	18300	18800	32300	25600
pmf0557	327	171	6.09	350.03	[M]-	C19371	Acid orange 20	Alkaloids	2790000	2740000	2870000	546000	376000	338000	3120000	3020000	1630000	615000	1160000	4910000
pmf0558	187	131	6	186.03	[M+H]+	C09060	Angelicin	Phenylpropanoids	26700	40900	30200	33100	60300	33000	9	48100	30100	9	50500	40700
pmf0559	217.1	116	2.64	218.11	[M-H]-	C02983	Abrine	Alkaloids	542000	638000	654000	1500000	1330000	1210000	108000	96300	135000	25300	44600	43200
pmf0565	175	112.9	0.79	176.04	[M-H]-	-	L-Dencichin	Alkaloids	273000	252000	277000	200000	106000	163000	188000	162000	159000	88300	102000	156000
pmf0578	191	111	1.18	192.03	[M-H]-	-	Citric acid monohydrate	Organic acids and derivatives	9020000	8860000	9850000	11700000	10800000	9560000	8390000	7850000	7550000	5100000	6030000	5540000
pmf0582	325.1	123	7.88	324.14	[M+H]+	C10421	Glabridin	Flavonoid	22400	15200	28300	24500	23000	31300	33600	9	37500	9	9	9
pmf0584	437.1	275	4.37	436.14	[M+H]+	C01604	Phloridzin	Flavonoid	201000	207000	123000	79200	390000	36400	66200	46600	22200	71700	32500	106000
pmf0585	116.1	70	0.79	115.06	[M+H]+	C16435	Proline	Amino acid and derivatives	58800000	68400000	60400000	37700000	35600000	24400000	99000000	81100000	84000000	153000000	152000000	169000000
pmf0587	132	88	0.78	133.04	[M-H]-	C16433	Aspartic acid	Amino acid and derivatives	12000000	11700000	12000000	2070000	2920000	2410000	18100000	16100000	16500000	25900000	26000000	25400000
pmf0589	146	102	0.76	147.05	[M-H]-	-	Glutamic acid	Amino acid and derivatives	8260000	8490000	8200000	1420000	2010000	1960000	8340000	6650000	8850000	33100000	29800000	27800000
pmf0591	149.2	102.8	5.44	148.16	[M+H]+	C10438	Cinnamic acid	Phenylpropanoids	200000	186000	189000	705000	720000	532000	9	9	9	9	9	9
pmf0593	118.2	55.1	0.84	117.15	[M+H]+	C06417	D-(-)-Valine	Amino acid and derivatives	51900000	53200000	49400000	69000000	56100000	50900000	36100000	29900000	34200000	37900000	39800000	41000000
pmf0594	166.2	77	1.92	165.19	[M+H]+	C02265	D-(+)-Phenylalanine	Amino acid and derivatives	3010000	3100000	2970000	919000	1090000	974000	4010000	3590000	4220000	1950000	2110000	2670000
pmf0599	137.1	109	12.49	136.13	[M+H]+	C06306	(+)-alpha-Pinene	Terpene	4120000	4040000	3690000	4010000	3680000	3960000	4470000	3870000	3970000	4570000	4130000	4310000
pmf0605	355.1	102.8	8.45	354.15	[M+H]+	C17499	Notopterol	Phenylpropanoids	111000	98600	108000	114000	129000	111000	87500	110000	105000	81700	79400	92100
pmf0606	177	133.1	7.19	178.05	[M-H]-	-	Pectin (Technical Grade)	Others	943000	925000	948000	405000	1310000	927000	700000	1700000	778000	1270000	381000	1850000
pmf0611	209.1	76.9	8.45	208.09	[M+H]+	C01484	Chalcone	Flavonoid	51900	38900	40200	150000	118000	55900	9	9	9	9	9	9
pmf0612	286.1	171.2	7.42	285.14	[M+H]+	C03882	Piperine	Alkaloids	29100	23500	12400	16600	9	9	9	9	9	9	9	9
pmf0613	155.1	114	12.35	154.14	[M+H]+	C16772	α-Terpineol	Terpene	117000000	119000000	112000000	93700000	115000000	115000000	117000000	121000000	115000000	119000000	118000000	121000000
